# Supplementary material
Source: PubMed Central journal article supplement (PMC6145787)
Supplement: jamaotolaryngolheadnecksurg-144-594-s001.pdf [file jamaotolaryngolheadnecksurg-144-594-s001.pdf]

## Supplementary Online Content

Byars SG, Stearns SC, Boomsma JJ. Association of long-term risk of respiratory, allergic, and infectious diseases with removal of adenoids and tonsils in childhood [published online June 7, 2018]. *JAMA Otolaryngol Head Neck Surge*. doi:10.1001/jamaoto.2018.0614

**eTable 1.** Sample sizes (main analysis)

**eTable 2.** ICD-8 and ICD-10 codes (all analyses)

**eTable 3.** Relative risks for non-immune diseases

**eTable 4.** Risks (relative, absolute, NNT) for disease outcomes

**eTable 5.** Full Cox regression results (tonsillectomy)

**eTable 6.** Full Cox regression results (adenoidectomy)

**eTable 7.** Full Cox regression results (adenotonsillectomy)

**eTable 8.** Risks (relative, absolute, NNT) for conditions surgeries treat

**eMethods**

**eResults**

This supplementary material has been provided by the authors to give readers additional information about their work.

|                                                                                 | <b>Page</b>  |
|---------------------------------------------------------------------------------|--------------|
| <b>Table S1:</b> sample sizes (main analysis) .....                             | <b>1</b>     |
| <b>Table S2:</b> ICD8 and ICD10 codes (all analyses) .....                      | <b>2-27</b>  |
| <b>Table S3:</b> relative risks for non-immune diseases .....                   | <b>28</b>    |
| <b>Table S4:</b> risks (relative, absolute, NNT) for disease outcomes .....     | <b>29</b>    |
| <b>Table S5:</b> full Cox regression results (tonsillectomy) .....              | <b>30-43</b> |
| <b>Table S6:</b> full Cox regression results (adenoidectomy) .....              | <b>44-57</b> |
| <b>Table S7:</b> full Cox regression results (adenotonsillectomy) .....         | <b>58-71</b> |
| <b>Table S8:</b> risks (relative, absolute, NNT) for conditions surgeries treat | <b>72</b>    |
| <b>Supplementary Methods</b> .....                                              | <b>73-76</b> |
| <b>Supplementary Results &amp; Discussion</b> .....                             | <b>77-79</b> |

**Table S1. Sample sizes used for each analysis including the number of individuals who underwent surgery between birth and 9 years, number diagnosed with a particular disease after 9 years and up to 30 years of age, and total sample size available.** Sample sizes represent those after all exclusions have been applied and are thus smaller than the sample in Table 1.

| Disease                          | adenoidectomy |             |           | tonsillectomy |             |           | adenotonsillectomy |             |           |
|----------------------------------|---------------|-------------|-----------|---------------|-------------|-----------|--------------------|-------------|-----------|
|                                  | Surgery (n)   | Disease (n) | Total (n) | Surgery (n)   | Disease (n) | Total (n) | Surgery (n)        | Disease (n) | Total (n) |
| <b>infectious/parasitic all</b>  | 14508         | 37433       | 1061466   | 9852          | 36972       | 1056810   | 26456              | 37618       | 1073414   |
| <b>all</b>                       | 16813         | 17503       | 1154039   | 11542         | 17283       | 1148768   | 30516              | 17588       | 1167742   |
| <b>rhinitis</b>                  | 17293         | 8875        | 1171807   | 11783         | 8748        | 1166297   | 31206              | 8903        | 1185720   |
| <b>allergic conjunctivitis</b>   | 17462         | 1948        | 1175146   | 11830         | 1916        | 1169514   | 31377              | 1957        | 1189061   |
| <b>eczema/dermatitis</b>         | 17046         | 4853        | 1162563   | -             | -           | -         | 30883              | 4880        | 1176400   |
| <b>urticaria/angiodema</b>       | 17399         | 4645        | 1171672   | 11769         | 4595        | 1166042   | 31229              | 4667        | 1185502   |
| <b>skin all</b>                  | 16750         | 51882       | 1138501   | 11274         | 51259       | 1133025   | 29936              | 52284       | 1151687   |
| <b>autoimmune all</b>            | 16905         | 23536       | 1154549   | 11582         | 23256       | 1149226   | 30654              | 23698       | 1168298   |
| <b>all</b>                       | 677           | 50906       | 960489    | -             | -           | -         | -                  | -           | -         |
| <b>upper</b>                     | 869           | 33148       | 1054535   | 140           | 33109       | 1053806   | -                  | -           | -         |
| <b>lower</b>                     | 14325         | 7389        | 1083597   | 10355         | 7244        | 1079627   | 27359              | 7413        | 1096631   |
| <b>respiratory chronic lower</b> | 15781         | 22967       | 1123530   | 11037         | 22684       | 1118786   | 29046              | 23174       | 1136795   |
| <b>asthma</b>                    | 15994         | 22726       | 1127539   | 11077         | 22450       | 1122622   | 29231              | 22939       | 1140776   |
| <b>influenza</b>                 | 17394         | 2832        | 1173084   | 11794         | 2787        | 1167484   | 31278              | 2856        | 1186968   |
| <b>pneumonia</b>                 | 15253         | 6734        | 1114290   | 10837         | 6597        | 1109874   | 28660              | 6741        | 1127697   |
| <b>COPD</b>                      | 17353         | 701         | 1173478   | -             | -           | -         | -                  | -           | -         |
| <b>digestive all</b>             | 15897         | 61591       | 1116977   | 11054         | 60823       | 1112134   | 29366              | 61969       | 1130446   |
| <b>endocrine all</b>             | 16707         | 26761       | 1157402   | 11549         | 26355       | 1152244   | 30511              | 27001       | 1171206   |
| <b>obesity</b>                   | 17405         | 16710       | 1173967   | 11788         | 16452       | 1168350   | 31257              | 16886       | 1187819   |
| <b>genitourinary all</b>         | 16969         | 24206       | 1157015   | 11511         | 23907       | 1151557   | 30684              | 24372       | 1170730   |
| <b>kidney infection</b>          | 17246         | 3785        | 1169259   | 11723         | 3732        | 1163736   | 31123              | 3803        | 1183136   |
| <b>musculoskeletal all</b>       | 16898         | 109299      | 1144964   | 11433         | 108111      | 1139499   | 30319              | 110222      | 1158385   |
| <b>neoplasms all</b>             | 17152         | 29050       | 1164289   | 11669         | 28698       | 1158806   | 30975              | 29224       | 1178112   |
| <b>benign</b>                    | 17220         | 25081       | 1166731   | 11703         | 24796       | 1161214   | 31047              | 25245       | 1180558   |
| <b>circulatory all</b>           | 17262         | 12991       | 1172014   | 11787         | 12813       | 1166539   | 31263              | 13093       | 1186015   |
| <b>nervous all</b>               | 17183         | 8193        | 1170431   | 11757         | 8050        | 1165005   | 31188              | 8197        | 1184436   |
| <b>eye/adnexa all</b>            | 8086          | 30052       | 1111548   | 10415         | 30070       | 1113877   | 25783              | 30514       | 1129245   |
| <b>mental all</b>                | 17460         | 48824       | 1174924   | 11830         | 48167       | 1169294   | 31368              | 49174       | 1188832   |

Footnotes: Numbers are presented only for analyses with sufficient power for hypothesis testing (see methods)

**Table S2. ICD-8 and ICD-10 classification codes used for A. main outcome diseases tested, B. covariate effects, C. conditions surgeries treat and D. non-immune diseases. Surgeries include adenoidectomy, tonsillectomy and adenotonsillectomy.**

| <b>A. MAIN DISEASES</b>               |                                                                                                                                                                                                                                                                                                                                                                                                                                                                                                                                                                                                                                                                                                                                                                                                                                                                                                                                                                                                                                                                                                                                                                                                                                                                                                                                                                                                                                                                                                                                                                                                                                                                                                                                                                                                                                                                                                                                                                                                                                                                                                                                                                                                                                                                                                                                                                                                                                                                                                                                                                                                                                                                                                                                                                                                                                                                                                                                                                                                                                 |
|---------------------------------------|---------------------------------------------------------------------------------------------------------------------------------------------------------------------------------------------------------------------------------------------------------------------------------------------------------------------------------------------------------------------------------------------------------------------------------------------------------------------------------------------------------------------------------------------------------------------------------------------------------------------------------------------------------------------------------------------------------------------------------------------------------------------------------------------------------------------------------------------------------------------------------------------------------------------------------------------------------------------------------------------------------------------------------------------------------------------------------------------------------------------------------------------------------------------------------------------------------------------------------------------------------------------------------------------------------------------------------------------------------------------------------------------------------------------------------------------------------------------------------------------------------------------------------------------------------------------------------------------------------------------------------------------------------------------------------------------------------------------------------------------------------------------------------------------------------------------------------------------------------------------------------------------------------------------------------------------------------------------------------------------------------------------------------------------------------------------------------------------------------------------------------------------------------------------------------------------------------------------------------------------------------------------------------------------------------------------------------------------------------------------------------------------------------------------------------------------------------------------------------------------------------------------------------------------------------------------------------------------------------------------------------------------------------------------------------------------------------------------------------------------------------------------------------------------------------------------------------------------------------------------------------------------------------------------------------------------------------------------------------------------------------------------------------|
| <b>Infectious/parasitic<br/>– all</b> | <b>ICD-8:</b> 00009,00019,00099,00199,00209,00219,00299,00300,00301,00308,<br>00309,00390,00391,00398,00399,00409,00419,00429,00439,00489,<br>00499,00509,00519,00529,00589,00599,00609,00690,00698,00699,<br>00709,00719,00720,00799,00809,00819,00820,00821,00829,00839,<br>00880,00889,00890,00899,00909,00919,00920,00921,00922,00928,<br>00929,00999,01099,01100,01101,01102,01103,01104,01105,01108,<br>01109,01200,01201,01208,01209,01210,01211,01218,01219,01229,<br>01239,01290,01291,01292,01299,01300,01301,01308,01309,01390,<br>01391,01399,01400,01401,01402,01409,01509,01519,01529,01589,<br>01599,01600,01601,01602,01603,01604,01605,01606,01608,01609,<br>01700,01701,01702,01708,01709,01710,01718,01719,01729,01739,<br>01790,01799,01809,01819,01899,01900,01901,01902,01903,01904,<br>01908,01909,01919,01920,01921,01929,01930,01931,01932,01938,<br>01939,01999,02009,02099,02199,02299,02309,02319,02329,02399,<br>02499,02599,02609,02700,02701,02708,02709,02719,02790,02799,<br>03009,03019,03029,03039,03099,03199,03299,03319,03399,03400,<br>03401,03409,03410,03411,03419,03599,03609,03610,03611,03612,<br>03618,03619,03689,03699,03799,03809,03819,03829,03880,03889,<br>03899,03909,03919,03990,03991,03992,03993,03999,04000,04009,<br>04199,04299,04399,04499,04509,04519,04599,04699,05009,05019,<br>05099,05199,05200,05201,05208,05209,05300,05301,05302,05303,<br>05308,05309,05400,05401,05402,05403,05404,05408,05409,05500,<br>05501,05508,05509,05600,05601,05608,05609,05709,05719,05789,<br>05799,06009,06099,06199,06209,06219,06239,06299,06309,06329,<br>06399,06499,06599,06600,06608,06609,06709,06749,06759,06799,<br>06809,06819,06829,06899,07000,07001,07002,07003,07004,07005,<br>07006,07007,07008,07009,07199,07200,07201,07202,07203,07204,<br>07208,07209,07399,07409,07419,07429,07499,07500,07501,07508,<br>07509,07699,07799,07809,07819,07829,07889,07899,07909,07910,<br>07911,07918,07919,07929,07939,07949,07951,07959,07982,07983,<br>07984,07989,07999,08099,08109,08119,08129,08199,08209,08219,<br>08229,08299,08309,08319,08389,08399,08409,08419,08429,08439,<br>08449,08459,08480,08489,08499,08509,08519,08599,08609,08699,<br>08709,08719,08789,08799,08809,08819,08899,08909,08999,10009,<br>10080,10089,10099,10199,10209,10219,10229,10269,10289,10299,<br>10309,10339,10399,10409,10499,11000,11001,11002,11003,11004,<br>11005,11008,11009,11109,11119,11129,11180,11189,11199,11200,<br>11201,11208,11209,11399,11499,11599,11609,11699,11709,11719,<br>11729,11739,11749,11789,11799,12009,12019,12029,12089,12099,<br>12109,12119,12129,12139,12199,12209,12219,12289,12299,12309,<br>12319,12329,12339,12349,12369,12399,12499,12509,12519,12529,<br>12539,12559,12589,12599,12609,12619,12689,12699,12709,12719,<br>12729,12739,12749,12759,12799,12809,12889,12899,12999,13100,<br>13101,13108,13109,13200,13201,13208,13209,13309,13399,13409,<br>13419,13429,13439,13449,13459,13469,13499,13599,13600,13601,<br>13602,13603,13609 |
|                                       | <b>ICD10:</b> A00,A000,A001,A009,A01,A010,A011,                                                                                                                                                                                                                                                                                                                                                                                                                                                                                                                                                                                                                                                                                                                                                                                                                                                                                                                                                                                                                                                                                                                                                                                                                                                                                                                                                                                                                                                                                                                                                                                                                                                                                                                                                                                                                                                                                                                                                                                                                                                                                                                                                                                                                                                                                                                                                                                                                                                                                                                                                                                                                                                                                                                                                                                                                                                                                                                                                                                 |

---

A012,A013,A014,A02,A020,A021,A022,A022A,A022C,A022D,  
A022E,A028,A029,A03,A030,A031,A032,A033,A038,A039,  
A04,A040,A041,A042,A043,A044,A045,A046,A047,A048,  
A049,A05,A050,A051,A052,A053,A054,A058,A059,A06,  
A060,A061,A062,A063,A063A,A064,A065,A066,A068,A068A,  
A069,A07,A070,A071,A071A,A072,A073,A073A,A078,A079,  
A08,A080,A081,A082,A083,A083A,A084,A085,A09,A099,  
A15,A150,A150A,A150C,A150D,A151,A152,A153,A154,A154A,  
A154B,A154C,A155,A155A,A156,A156A,A157,A158,A158A,A159,  
A16,A160,A160A,A160B,A160C,A160D,A161,A162,A162A,A162B,  
A162C,A162D,A163,A164,A164A,A164B,A164C,A164D,A165,A165A,  
A167,A168,A168A,A168B,A168C,A169,A17,A170,A170A,A171,  
A178,A178A,A178D,A178E,A179,A18,A180,A180A,A180B,A180C,  
A180D,A180E,A180F,A180G,A181,A181B,A181C,A181D,A181F,A182,  
A183,A183A,A183B,A183C,A183E,A184,A184A,A184C,A184E,A184G,  
A184I,A185,A185D,A186,A187,A187A,A188,A188B,A188D,A188H,  
A19,A190,A191,A192,A198,A199,A20,A209,A21,A219,  
A229,A23,A239,A239A,A239B,A239C,A239D,A240,A240A,A244,  
A25,A259,A269,A27,A270,A278,A278D,A279,A28,A280,  
A281,A282,A282A,A282B,A288,A289,A30,A309,A31,A310,  
A310A,A310C,A311,A311A,A311B,A318,A319,A320,A321,A321A,  
A321B,A327,A328,A329,A339,A35,A359,A36,A360,A361,  
A362,A363,A368,A368A,A368D,A369,A37,A370,A371,A378,  
A379,A38,A389,A39,A390,A391,A392,A392A,A393,A394,  
A395,A398,A398B,A399,A40,A400,A401,A402,A403,A408,  
A409,A41,A410,A411,A411A,A412,A413,A414,A415,A418,  
A419,A419A,A419B,A42,A420,A421,A422,A427,A428,A429,  
A439,A449,A46,A469,A48,A480,A481,A482,A483,A484,  
A488,A488A,A49,A490,A491,A491A,A492,A493,A498,A499,  
A499A,A659,A669,A679,A68,A680,A681,A689,A69,A690,  
A690A,A690C,A691,A691A,A691C,A691E,A691F,A691G,A692,A692A,  
A692B,A692C,A692D,A692E,A692F,A692G,A698,A699,A70,A709,  
A709A,A709B,A719,A74,A740,A748,A749,A75,A759,A77,  
A779,A78,A789,A79,A799,A80,A800,A801,A802,A803,  
A804,A809,A81,A810,A811,A812,A818,A819,A82,A829,  
A830,A838,A839,A84,A840,A840A,A841,A848,A849,A85,  
A850,A851,A851B,A852,A858,A86,A869,A87,A870,A871,  
A872,A872A,A878,A879,A88,A880,A881,A888,A89,A899,  
A90,A909,A91,A919,A929,A931,A94,A949,A959,A962,  
A968,A969,A98,A984,A985,A985A,A985B,A985C,A988,A99,  
A999,B00,B000,B000A,B001,B001A,B001B,B002,B002A,B002B,  
B003,B004,B004A,B005,B005A,B005B,B005C,B005D,B005E,B005F,  
B005G,B007,B008,B009,B01,B010,B011,B011A,B012,B018,  
B019,B02,B020,B020A,B021,B022,B022A,B022B,B023,B023A,  
B023B,B023C,B023D,B023E,B023F,B027,B028,B029,B03,B039,  
B049,B05,B050,B051,B052,B053,B054,B058,B059,B06,  
B060,B068,B069,B07,B079,B079A,B079B,B079C,B079D,B08,  
B080,B080A,B080B,B081,B082,B083,B084,B084A,B085,B088,  
B088A,B088C,B09,B099,B15,B150,B159,B159A,B16,B160,  
B161,B162,B169,B17,B170,B171,B172,B178,B18,B180,  
B181,B182,B188,B189,B19,B190,B199,B25,B250,B251,  
B252,B253,B257,B258,B259,B26,B260,B261,B262,B263,  
B268,B269,B27,B270,B271,B278,B279,B30,B300,B301,  
B301A,B301B,B302,B303,B308,B309,B33,B330,B331,B332,

---

B333,B338,B34,B340,B341,B341A,B341B,B342,B343,B344,  
 B348,B349,B349A,B35,B350,B350A,B350C,B351,B352,B353,  
 B354,B355,B356,B356A,B358,B358A,B359,B36,B360,B360A,  
 B360B,B361,B362,B363,B368,B368A,B369,B37,B370,B370A,  
 B371,B372,B372A,B372B,B373,B373A,B373B,B374,B374A,B375,  
 B376,B377,B378,B378A,B378B,B378C,B379,B38,B389,B39,  
 B399,B40,B409,B419,B429,B43,B439,B44,B440,B441,  
 B441A,B441B,B442,B447,B448,B448A,B449,B450,B451,B451A,  
 B452,B453,B457,B458,B459,B46,B469,B469A,B469C,B47,  
 B470,B471,B479,B48,B480,B481,B482,B483,B484,B487,  
 B488,B49,B499,B499A,B50,B509,B51,B519,B52,B529,  
 B53,B530,B538,B54,B549,B55,B550,B550A,B551,B552,  
 B559,B56,B560,B561,B569,B57,B579,B579A,B58,B580,  
 B581,B582,B582A,B583,B588,B588A,B589,B59,B599,B600,  
 B601,B601A,B601B,B602,B608,B649,B65,B650,B651,B652,  
 B656,B658,B659,B66,B660,B661,B663,B664,B665,B668,  
 B669,B67,B670,B671,B672,B673,B674,B675,B676,B677,  
 B678,B679,B68,B680,B681,B689,B699,B700,B701,B71,  
 B719,B729,B739,B74,B740,B749,B75,B759,B76,B760,  
 B761,B768,B769,B769A,B77,B770,B778,B779,B78,B789,  
 B79,B799,B80,B809,B81,B814,B818,B82,B820,B829,  
 B83,B830,B838,B839,B85,B850,B851,B852,B853,B854,  
 B86,B869,B869A,B869B,B87,B879,B88,B880,B881,B888,  
 B888B,B888C,B888D,B889,B89,B899,B899A

**allergic – all**      **ICD-8:** 69299,69292,69291,69290,69289,69288,69287,69286,69285,69284,  
 69283,69282,69281,69280,69279,69269,69263,69262,69261,69260,  
 69259,69249,69243,69242,69241,69240,69239,69233,69232,69231,  
 69230,69229,69223,69222,69221,69220,69219,69213,69212,69211,  
 69210,69209,69203,69202,69201,69200,69109,69108,69101,69100,  
 50709,50708,50703,50702,50701,50700,36003,99949,70899,70891,  
 70890,70809

**ICD10:** T886,T805,T782A,T782,T780B,T780A,T780,L509,L508E,L508D,  
 L508C,L508B,L508A,L508,L506A,L506,L505,L504,L503,L502B,  
 L502A,L502,L501,L500,L50,L239A,L239,L238C,L238B,L238A,  
 L238,L237A,L237,L236A,L236,L235I,L235H,L235G,L235F,L235E,  
 L235D,L235C,L235B,L235A,L235,L234A,L234,L233A,L233,L232G,  
 L232F,L232E,L232D,L232C,L232B,L232A,L232,L231A,L231,L230E,  
 L230D,L230C,L230B,L230A,L230,L23,L209,L208D,L208C,L208B,  
 L208A,L208,L200A,L200,L20,J304,J303A,J303,J302,J301C,  
 J301B,J301A,J301,H101A,H101

**allergic – rhinitis**      **ICD-8:** 50700,50701,50702,50703,50708,50709

**ICD10:** J301,J301A,J301B,J301C,J302,J303,J303A,J304

**allergic –**      **ICD-8:** 36003

**conjunctivitis**      **ICD10:** H101,H101A

**allergic –**      **ICD-8:** 69100,69101,69108,69109,69200,69201,69202,69203,69209,69210,  
**eczema/dermatitis**      69211,69212,69213,69219,69220,69221,69222,69223,69229,69230,  
 69231,69232,69233,69239,69240,69241,69242,69243,69249,69259,  
 69260,69261,69262,69263,69269,69279,69280,69281,69282,69283,  
 69284,69285,69286,69287,69288,69289,69290,69291,69292,69299

**ICD10:** L20,L200,L200A,L208,L208A,L208B,L208C,L208D,L209,L23,  
 L230,L230A,L230B,L230C,L230D,L230E,L231,L231A,L232,L232A,  
 L232B,L232C,L232D,L232E,L232F,L232G,L233,L233A,L234,L234A,  
 L235,L235A,L235B,L235C,L235D,L235E,L235F,L235G,L235H,L235I,

|                            |                                                                                                                                                                                                                                                                                                                                                                                                                                                                                                                                                                                                                                                                                                                                                                                                                                                                                                                                                                                                                                                                                                                                                                                                                                                                                                                                                                                                                                                                                                                                                                                                                                                                                                                                                                                                                                                                                                                                                                                                                             |
|----------------------------|-----------------------------------------------------------------------------------------------------------------------------------------------------------------------------------------------------------------------------------------------------------------------------------------------------------------------------------------------------------------------------------------------------------------------------------------------------------------------------------------------------------------------------------------------------------------------------------------------------------------------------------------------------------------------------------------------------------------------------------------------------------------------------------------------------------------------------------------------------------------------------------------------------------------------------------------------------------------------------------------------------------------------------------------------------------------------------------------------------------------------------------------------------------------------------------------------------------------------------------------------------------------------------------------------------------------------------------------------------------------------------------------------------------------------------------------------------------------------------------------------------------------------------------------------------------------------------------------------------------------------------------------------------------------------------------------------------------------------------------------------------------------------------------------------------------------------------------------------------------------------------------------------------------------------------------------------------------------------------------------------------------------------------|
|                            | L236,L236A,L237,L237A,L238,L238A,L238B,L238C,L239,L239A                                                                                                                                                                                                                                                                                                                                                                                                                                                                                                                                                                                                                                                                                                                                                                                                                                                                                                                                                                                                                                                                                                                                                                                                                                                                                                                                                                                                                                                                                                                                                                                                                                                                                                                                                                                                                                                                                                                                                                     |
| <b>allergic –</b>          | <b>ICD-8:</b> 70809,70890,70891,70899                                                                                                                                                                                                                                                                                                                                                                                                                                                                                                                                                                                                                                                                                                                                                                                                                                                                                                                                                                                                                                                                                                                                                                                                                                                                                                                                                                                                                                                                                                                                                                                                                                                                                                                                                                                                                                                                                                                                                                                       |
| <b>urticaria/angiodema</b> | <b>ICD10:</b> L50,L500,L501,L502,L502A,L502B,L503,L504,L505,L506,<br>L506A,L508,L508A,L508B,L508C,L508D,L508E,L509                                                                                                                                                                                                                                                                                                                                                                                                                                                                                                                                                                                                                                                                                                                                                                                                                                                                                                                                                                                                                                                                                                                                                                                                                                                                                                                                                                                                                                                                                                                                                                                                                                                                                                                                                                                                                                                                                                          |
| <b>skin – all</b>          | <b>ICD-8:</b> 68009,68019,68029,68039,68049,68059,68069,68080,68081,68089,<br>68099,68100,68101,68102,68103,68104,68105,68106,68107,68108,<br>68109,68200,68201,68202,68209,68219,68229,68239,68249,68259,<br>68290,68299,68399,68400,68408,68409,68500,68501,68509,68600,<br>68608,68609,68619,68690,68692,68693,68694,68695,68696,68699,<br>69000,69001,69002,69003,69008,69009,69300,69308,69309,69400,<br>69401,69402,69403,69405,69408,69409,69519,69529,69530,69538,<br>69539,69549,69590,69591,69599,69609,69610,69619,69620,69621,<br>69628,69629,69639,69649,69650,69659,69699,69709,69719,69790,<br>69799,69809,69819,69829,69830,69831,69839,69849,69890,69899,<br>70099,70100,70101,70108,70109,70110,70112,70114,70115,70118,<br>70119,70129,70139,70190,70191,70199,70200,70201,70202,70203,<br>70209,70300,70301,70302,70303,70304,70305,70308,70309,70400,<br>70401,70402,70403,70404,70405,70406,70408,70409,70509,70519,<br>70590,70591,70592,70593,70599,70700,70701,70708,70709,70809,<br>70890                                                                                                                                                                                                                                                                                                                                                                                                                                                                                                                                                                                                                                                                                                                                                                                                                                                                                                                                                                                                         |
|                            | <b>ICD10:</b> L00,L009,L009A,L009B,L01,L010,L010A,L010B,L011,L02,<br>L020,L020A,L020B,L020C,L021,L021A,L021B,L021C,L022,L022A,<br>L022B,L022C,L022D,L022E,L022F,L022G,L022H,L022I,L022J,L022K,<br>L022L,L022N,L022O,L022P,L022Q,L022R,L022S,L022T,L023,L023A,<br>L023B,L023C,L023D,L024,L024A,L024B,L024C,L024D,L024E,L024F,<br>L024G,L024H,L024I,L024J,L024K,L024L,L024M,L028,L028A,L028B,<br>L028C,L029,L029A,L029B,L029C,L03,L030,L030A,L030B,L030C,<br>L030D,L030E,L030F,L030G,L030H,L030I,L030J,L030K,L031,L031A,<br>L031B,L031C,L031D,L031E,L031F,L031G,L031H,L031I,L032,L033,<br>L033A,L033B,L033C,L033D,L033E,L033F,L038,L038A,L038B,L039,<br>L039A,L04,L040,L040A,L040B,L040C,L041,L042,L042A,L043,<br>L048,L049,L05,L050,L059,L08,L080,L080A,L081,L088,<br>L088A,L088B,L088C,L089,L10,L100,L101,L102,L103,L104,<br>L104A,L108,L108A,L109,L11,L110,L111,L118,L119,L12,<br>L120,L121,L121A,L123,L128,L129,L13,L130,L131,L131A,<br>L138,L138A,L138B,L138C,L139,L20,L200,L200A,L208,L208A,<br>L208B,L208C,L208D,L209,L21,L210,L210A,L210B,L218,L218A,<br>L218B,L218C,L218E,L218F,L218G,L219,L28,L280,L280A,L280B,<br>L280C,L281,L282,L282A,L282B,L282C,L282E,L30,L300,L301,<br>L301A,L301B,L302,L302A,L303,L304,L305,L305A,L308,L308A,<br>L308B,L308C,L308D,L308E,L308F,L308G,L308H,L308I,L309,L40,<br>L400,L400A,L400B,L400C,L401,L401A,L401B,L402,L402A,L402B,<br>L403,L403A,L403B,L404,L405,L408,L408A,L408B,L408C,L408D,<br>L408E,L409,L41,L410,L410A,L410B,L410C,L411,L412,L413,<br>L414,L415,L418,L419,L42,L429,L43,L430,L431,L433,<br>L438,L438A,L438B,L438C,L438D,L438E,L439,L44,L440,L441,<br>L442,L443,L448,L448A,L448B,L448C,L448D,L449,L50,L500,<br>L501,L502,L502A,L502B,L503,L504,L505,L506,L506A,L508,<br>L508A,L508B,L508C,L508D,L508E,L509,L51,L510,L511,L511A,<br>L512,L518,L518A,L519,L52,L529,L53,L531,L532,L533,<br>L538,L538A,L538B,L538C,L538D,L539,L539A,L539B,L60,L600,<br>L601,L602,L603,L603A,L603B,L604,L605,L608,L608A,L608C,<br>L608D,L608E,L608F,L608G,L608H,L608I,L609,L63,L630,L631, |

---

L632,L638,L638A,L639,L64,L648,L649,L65,L650,L651,  
L652,L658,L658A,L658B,L658C,L659,L66,L660,L661,L662,  
L663,L664,L668,L668A,L669,L67,L670,L671,L671D,L671E,  
L678,L678A,L678B,L678D,L679,L68,L682,L683,L688,L689,  
L71,L711,L718,L718A,L718B,L718C,L718D,L718E,L719,L72,  
L720,L721,L721A,L721B,L722,L728,L729,L73,L730,L731,  
L732,L738,L738A,L738B,L738D,L738E,L738F,L738H,L738I,L739,  
L74,L740,L741,L742,L743,L744,L744A,L748,L748A,L749,  
L75,L750,L751,L752,L752A,L758,L759,L84,L849,L849A,  
L849B,L87,L870,L871,L872,L878,L878A,L879,L88,L889,  
L889B,L889D,L89,L899,L899A,L899B,L899C,L899D,L899E,L899F,  
L90,L900,L900A,L900B,L901,L902,L903,L904,L904A,L905,  
L905A,L905B,L905C,L905D,L906,L906A,L906B,L906C,L906D,L908,  
L908A,L908B,L908D,L908F,L908G,L908J,L908K,L909,L91,L910,  
L910A,L918,L918B,L919,L92,L920,L920A,L920C,L921,L922,  
L923,L923A,L923B,L928,L928A,L928D,L928E,L928G,L929,L929A,  
L929B,L94,L940,L940A,L940B,L941,L942,L942A,L942B,L943,  
L944,L945,L946,L948,L949,L95,L950,L950A,L951,L958,  
L958A,L958B,L959,L97,L979,L979A,L979B,L979C,L979D,L979E,  
L98,L980,L981,L981A,L982,L983,L984,L984A,L984B,L984C,  
L984D,L984E,L985,L985A,L985B,L985C,L985D,L985E,L985F,L985G,  
L985H,L985I,L986,L988,L988A,L988B,L988C,L988D,L989

---

**autoimmune – all ICD-8:** 13599,13601,13602,24200,24401,24503,24900,24901,24902,24903,  
24904,24905,24906,24907,24908,24909,25510,26900,28100,28101,  
28108,28109,28390,28391,28709,28710,34000,34001,34008,34009,  
34809,35400,36401,39099,39109,39119,39129,39199,44301,44302,  
44308,44309,44319,44609,44619,44629,44630,44631,44639,44691,  
44692,51701,56301,56302,56308,56309,56319,57109,59502,69100,  
69308,69309,69400,69401,69402,69403,69405,69408,69409,69529,  
69549,69609,69610,69619,70101,70108,70109,70901,71209,71219,  
71229,71239,71249,71259,71609,71619,73309,73390,73400,73401,  
73402,73408,73409,73419,73490,73491

---

**ICD10:** D510,D510A,D591,D591A,  
D69,D690,D690A,D690B,D690C,D690D,D690E,D690F,D693,D693A,  
D86,D860,D861,D862,D863,D863A,D868,D868B,D868C,D868D,  
D868E,D868F,D869,E050A,E050B,E063,E063A,E063B,E063C,E10,  
E100,E100A,E100B,E100C,E100D,E100E,E100F,E101,E102,E103,  
E104,E105,E105A,E105B,E105C,E105D,E106,E107,E108,E109,  
E109A,E271A,G122G,G35,G359,G359A,G359B,G359C,G610,G610A,  
G700,H201,I00,I009,I009A,I009B,I01,I010,I011,I012,  
I018,I018A,I019,I730,I731,J841A,J841B,J841C,K50,K500,  
K500A,K500B,K500C,K500D,K501,K501A,K501B,K501C,K501D,K508,  
K508A,K508B,K508C,K509,K51,K510,K511,K512,K512A,K513,  
K513A,K514,K515,K518,K518A,K518B,K519,K743,K743A,K900,  
K900A,K900B,L10,L100,L101,L102,L104,L104A,L108,L108A,  
L109,L12,L120,L121,L121A,L122,L122A,L123,L128,L129,  
L130,L20,L200,L200A,L208,L208A,L208B,L208C,L208D,L209,  
L40,L400,L400A,L400B,L400C,L401,L401A,L401B,L402,L402A,  
L402B,L403,L403A,L403B,L404,L405,L408,L408A,L408B,L408C,  
L408D,L408E,L409,L52,L529,L80,L809,L93,L930,L930A,  
L931,L932,L932A,L932B,L932C,L940,L940A,L940B,M023,M05,  
M050,M050A,M051,M051B,M051C,M051D,M051E,M051F,M052,M053,  
M053A,M053C,M053D,M053E,M058,M059,M06,M060,M061,M062,  
M063,M064,M068,M069,M080,M080A,M080B,M081,M082,M082A,

---



---

M082B,M084,M088,M088A,M089,M300,M303,M310A,M313,M314,  
M315,M315A,M316,M316A,M32,M321,M321A,M321B,M321C,M321D,  
M321E,M328,M329,M33,M330,M331,M332,M339,M34,M340,  
M341,M348,M348A,M348B,M348C,M349,M350,M350A,M350B,M350C,  
M350D,M350E,M351,M351A,M352,M353,M45,M459,M459A,M459B,  
M720,N301

---

**respiratory – all**

**ICD-8:** 46099,46100,46101,46102,46103,46104,46108,46109,46200,46201,  
46208,46209,46300,46301,46302,46308,46309,46400,46401,46402,  
46403,46408,46409,46599,46600,46601,46602,46608,46609,47099,  
47100,47101,47108,47109,47200,47201,47209,47300,47308,47309,  
47400,47408,47409,48099,48100,48101,48108,48109,48209,48219,  
48229,48239,48290,48299,48300,48308,48309,48499,48599,48699,  
49000,49001,49009,49100,49101,49102,49103,49104,49108,49109,  
49200,49201,49208,49209,49300,49301,49302,49308,49309,50000,  
50001,50002,50008,50009,50199,50209,50210,50211,50212,50213,  
50214,50215,50218,50219,50300,50301,50302,50303,50304,50305,  
50306,50307,50308,50309,50400,50499,50500,50501,50502,50503,  
50504,50508,50509,50699,50700,50701,50702,50703,50708,50709,  
50800,50801,50802,50803,50804,50805,50806,50807,50809,51000,  
51001,51002,51003,51004,51008,51009,51100,51101,51108,51109,  
51119,51120,51121,51122,51129,51299,51300,51301,51302,51309,  
51400,51408,51409,51700,51701,51709,51899,51909,51919,51920,  
51921,51922,51923,51929,51990,51991,51992,51993,51999

---

**ICD10:** J00,J009,J009A,J009B,J009C,J01,J010,J010A,J010B,J011,  
J011A,J011B,J012,J012A,J012B,J013,J013B,J014,J014A,J018,  
J019,J02,J020,J020A,J028,J029,J029A,J029B,J029C,J03,  
J030,J038,J039,J039A,J039B,J039C,J039D,J039E,J039F,J04,  
J040,J040A,J040B,J040D,J041,J042,J042A,J05,J050,J051,  
J06,J060,J068,J069,J09,J091,J091A,J091B,J099,J10,  
J100,J101,J101A,J101B,J101C,J108,J108A,J108B,J108C,J11,  
J110,J111,J111A,J111B,J111C,J118,J118A,J118B,J118C,J12,  
J120,J121,J122,J128,J129,J13,J139,J139A,J139B,J14,  
J149,J149A,J149B,J15,J150,J151,J152,J153,J154,J155,  
J156,J156A,J157,J158,J159,J16,J160,J168,J18,J180,  
J181,J182,J188,J189,J20,J200,J201,J202,J203,J204,  
J205,J206,J207,J208,J209,J209A,J21,J210,J218,J219,  
J22,J229,J30,J300,J300A,J300B,J301,J301A,J301B,J301C,  
J302,J303,J303A,J304,J31,J310,J310A,J310B,J310D,J310E,  
J310F,J311,J312,J312A,J312B,J32,J320,J321,J322,J323,  
J324,J328,J329,J33,J330,J330A,J330B,J331,J331A,J338,  
J338A,J338B,J338C,J338D,J339,J34,J340,J340A,J340B,J340C,  
J340D,J340E,J340F,J340J,J341,J341A,J341B,J342,J343,J343A,  
J348,J348A,J348B,J348C,J35,J350,J351,J351A,J351B,J352,  
J353,J358,J358A,J358C,J359,J36,J369,J37,J370,J370A,  
J370B,J370C,J371,J38,J380,J380A,J380B,J381,J381A,J381B,  
J382,J382A,J383,J383A,J383B,J383C,J383D,J383E,J384,J384A,  
J384B,J384C,J384D,J385,J385A,J385B,J386,J387,J387A,J387B,  
J387D,J387E,J387G,J39,J390,J390A,J390B,J390C,J391,J391A,  
J392,J392A,J392B,J392C,J392D,J398,J399,J40,J409,J41,  
J410,J411,J418,J42,J429,J429A,J429B,J43,J430,J430A,  
J431,J431A,J432,J438,J439,J439A,J44,J440,J441,J448,  
J448A,J448B,J449,J45,J450,J450A,J451,J451A,J458,J459,  
J459A,J46,J469,J47,J479,J80,J801,J809,J81,J819,  
J82,J821,J829,J84,J840,J840A,J840B,J841,J841A,J841B,

---

J841C,J841D,J841E,J842,J843,J848,J848A,J849,J85,J850,  
 J850A,J851,J852,J853,J86,J860,J860A,J869,J869A,J90,  
 J909,J92,J929,J93,J930,J931,J938,J939,J94,J940,  
 J941,J942,J942A,J948,J948A,J949,J96,J960,J961,J969,  
 J98,J980,J980A,J980B,J980C,J980D,J980E,J980G,J980H,J980I,  
 J981,J982,J982A,J983,J984,J984B,J984C,J985,J985A,J985B,  
 J985C,J985D,J986,J986A,J986B,J986C,J986D,J988,J989

**respiratory – upper**    **ICD-8:** 46099,46100,46101,46102,46103,46104,46108,46109,46200,46201,  
 46208,46209,46300,46301,46302,46308,46309,46400,46401,46402,  
 46403,46408,46409,46599,50000,50001,50002,50008,50009,50199,  
 50209,50210,50211,50212,50213,50214,50215,50218,50219,50300,  
 50301,50302,50303,50304,50305,50306,50307,50308,50309,50400,  
 50499,50500,50501,50502,50503,50504,50508,50509,50699,50700,  
 50701,50702,50703,50708,50709,50800,50801,50802,50803,50804,  
 50805,50806,50807,50809

**ICD10:** J00,J009,J009A,J009B,J009C,J01,J010,J010A,J010B,J011,  
 J011A,J011B,J012,J012A,J012B,J013,J013B,J014,J014A,J018,  
 J019,J02,J020,J020A,J028,J029,J029A,J029B,J029C,J03,  
 J030,J038,J039,J039A,J039B,J039C,J039D,J039E,J039F,J04,  
 J040,J040A,J040B,J040D,J041,J042,J042A,J05,J050,J051,  
 J06,J060,J068,J069,J30,J300,J300A,J300B,J301,J301A,  
 J301B,J301C,J302,J303,J303A,J304,J31,J310,J310A,J310B,  
 J310D,J310E,J310F,J311,J312,J312A,J312B,J32,J320,J321,  
 J322,J323,J324,J328,J329,J33,J330,J330A,J330B,J331,  
 J331A,J338,J338A,J338B,J338C,J338D,J339,J34,J340,J340A,  
 J340B,J340C,J340D,J340E,J340F,J340J,J341,J341A,J341B,J342,  
 J343,J343A,J348,J348A,J348B,J348C,J35,J350,J351,J351A,  
 J351B,J352,J353,J358,J358A,J358C,J359,J36,J369,J37,  
 J370,J370A,J370B,J370C,J371,J38,J380,J380A,J380B,J381,  
 J381A,J381B,J382,J382A,J383,J383A,J383B,J383C,J383D,J383E,  
 J384,J384A,J384B,J384C,J384D,J385,J385A,J385B,J386,J387,  
 J387A,J387B,J387D,J387E,J387G,J39,J390,J390A,J390B,J390C,  
 J391,J391A,J392,J392A,J392B,J392C,J392D,J398,J399

**respiratory – lower**    **ICD-8:** 46600,46601,46602,46608,46609,48099,48100,48101,48108,48109,  
 48209,48219,48229,48239,48290,48299,48300,48308,48309,48499,  
 48599,48699

**ICD10:** J12,J120,J121,J122,J128,J129,J13,J139,J139A,J139B,  
 J14,J149,J149A,J149B,J15,J150,J151,J152,J153,J154,  
 J155,J156,J156A,J157,J158,J159,J16,J160,J168,J18,  
 J180,J181,J182,J188,J189,J20,J200,J201,J202,J203,  
 J204,J205,J206,J207,J208,J209,J209A,J21,J210,J218,  
 J219,J22,J229

**respiratory – lower-  
 chronic**    **ICD-8:** 49000,49001,49009,49100,49101,49102,49103,49104,49108,49109,  
 49200,49201,49208,49209,49300,49301,49302,49308,49309

**ICD10:** J40,J409,J41,J410,J411,J418,J42,J429,J429A,J429B,  
 J43,J430,J430A,J431,J431A,J432,J438,J439,J439A,J44,  
 J440,J441,J448,J448A,J448B,J449,J45,J450,J450A,J451,  
 J451A,J458,J459,J459A,J46,J469,J47,J479

**respiratory –**    **ICD-8:** 49300,49301,49302,49308,49309

**asthma**    **ICD10:** J45,J450,J450A,J451,J451A,J458,J459,J459A,J46,J469

**respiratory –**    **ICD-8:** 47099,47100,47101,47108,47109,47200,47201,47209,47300,47308  
**influenza**    47309,47400,47408,47409

**ICD10:** J09,J091,J091A,J091B,J099,J10,J100,J101,J101A,J101B,

|                                |                                                                                                                                                                                                                                                                                                                                                                                                                                                                                                                                                                                                                                                                                                                                                                                                                                                                                                                                                                                                                                                                                                                                                                                                                                                                                                                                                                                                                                                                                                                                                                                                                                                                                                                                                                                                                                                                                                                                                                                                                                                                                                                                                                                                                                                                                                                                                                                                                                                                                                                                                                                                                           |
|--------------------------------|---------------------------------------------------------------------------------------------------------------------------------------------------------------------------------------------------------------------------------------------------------------------------------------------------------------------------------------------------------------------------------------------------------------------------------------------------------------------------------------------------------------------------------------------------------------------------------------------------------------------------------------------------------------------------------------------------------------------------------------------------------------------------------------------------------------------------------------------------------------------------------------------------------------------------------------------------------------------------------------------------------------------------------------------------------------------------------------------------------------------------------------------------------------------------------------------------------------------------------------------------------------------------------------------------------------------------------------------------------------------------------------------------------------------------------------------------------------------------------------------------------------------------------------------------------------------------------------------------------------------------------------------------------------------------------------------------------------------------------------------------------------------------------------------------------------------------------------------------------------------------------------------------------------------------------------------------------------------------------------------------------------------------------------------------------------------------------------------------------------------------------------------------------------------------------------------------------------------------------------------------------------------------------------------------------------------------------------------------------------------------------------------------------------------------------------------------------------------------------------------------------------------------------------------------------------------------------------------------------------------------|
|                                | J101C,J108,J108A,J108B,J108C,J11,J110,J111,J111A,J111B,<br>J111C,J118,J118A,J118B,J118C                                                                                                                                                                                                                                                                                                                                                                                                                                                                                                                                                                                                                                                                                                                                                                                                                                                                                                                                                                                                                                                                                                                                                                                                                                                                                                                                                                                                                                                                                                                                                                                                                                                                                                                                                                                                                                                                                                                                                                                                                                                                                                                                                                                                                                                                                                                                                                                                                                                                                                                                   |
| <b>respiratory – pneumonia</b> | <b>ICD-8:</b> 48099,48100,48101,48108,48109,48209,48219,48229,48239,48290,<br>48299,48300,48308,48309,48499,48599,48699<br><b>ICD10:</b> J12,J120,J121,J122,J128,J129,J13,J139,J139A,J139B,<br>J14,J149,J149A,J149B,J15,J150,J151,J152,J153,J154,<br>J155,J156,J156A,J157,J158,J159,J16,J160,J168,J18,<br>J180,J181,J182,J188,J189                                                                                                                                                                                                                                                                                                                                                                                                                                                                                                                                                                                                                                                                                                                                                                                                                                                                                                                                                                                                                                                                                                                                                                                                                                                                                                                                                                                                                                                                                                                                                                                                                                                                                                                                                                                                                                                                                                                                                                                                                                                                                                                                                                                                                                                                                        |
| <b>respiratory – COPD</b>      | <b>ICD-8:</b> 49100,49101,49102,49103,49104,49108,49109,49200,49201,49208,<br>49209<br><b>ICD10:</b> J41,J410,J411,J418,J42,J429,J429A,J429B,J43,J430,<br>J430A,J431,J431A,J432,J438,J439,J439A,J44,J440,J441,<br>J448,J448A,J448B,J449                                                                                                                                                                                                                                                                                                                                                                                                                                                                                                                                                                                                                                                                                                                                                                                                                                                                                                                                                                                                                                                                                                                                                                                                                                                                                                                                                                                                                                                                                                                                                                                                                                                                                                                                                                                                                                                                                                                                                                                                                                                                                                                                                                                                                                                                                                                                                                                   |
| <b>digestive – all</b>         | <b>ICD-8:</b> 53000,53001,53002,53008,53009,53090,53091,53092,53093,53094,<br>53095,53096,53097,53098,53099,53100,53101,53108,53109,53190,<br>53191,53192,53193,53194,53195,53196,53198,53199,53209,53290,<br>53291,53299,53309,53390,53391,53399,53409,53490,53491,53499,<br>53500,53501,53502,53503,53504,53505,53506,53508,53509,53600,<br>53608,53609,53619,53690,53691,53692,53693,53699,53700,53701,<br>53702,53703,53704,53705,53706,53709,54000,54001,54002,54008,<br>54009,54090,54091,54092,54098,54099,54199,54200,54209,54300,<br>54301,54302,54309,55000,55001,55008,55009,55100,55101,55109,<br>55119,55129,55130,55131,55139,55180,55181,55182,55183,55189,<br>55199,55299,55309,55319,55329,55339,55380,55381,55389,55399,<br>56000,56001,56002,56008,56009,56019,56020,56021,56022,56028,<br>56029,56030,56038,56039,56090,56091,56092,56093,56094,56099,<br>56100,56101,56102,56103,56108,56109,56200,56208,56209,56210,<br>56211,56212,56218,56219,56300,56301,56302,56308,56309,56319,<br>56399,56419,56490,56499,56700,56701,56702,56703,56704,56708,<br>56709,56899,56900,56901,56904,56905,56906,56907,56908,56912,<br>56913,56914,56915,56916,56917,56920,56999,57000,57001,57002,<br>57008,57009,57109,57111,57119,57190,57191,57192,57193,57194,<br>57199,57200,57201,57209,57300,57301,57302,57303,57304,57305,<br>57309,57400,57401,57402,57403,57404,57405,57406,57407,57408,<br>57409,57500,57501,57502,57503,57504,57508,57509,57600,57601,<br>57602,57603,57604,57605,57609,57700,57701,57702,57703,57704,<br>57708,57709,57711,57719,57790,57791,57792,57793,57799<br><b>ICD10:</b> K20,K209,K209A,K209B,K209C,K21,K210,K210A,K219,K219A,<br>K22,K220,K220A,K221,K221A,K221B,K221C,K221D,K221E,K222,<br>K222A,K222B,K222C,K225,K225A,K225B,K228,K228A,K228B,K228C,<br>K228D,K228E,K228F,K228G,K228H,K228I,K229,K25,K250,K250A,<br>K250B,K250C,K250D,K250E,K250F,K251,K251A,K251B,K251C,K251D,<br>K251E,K252,K252A,K252B,K252C,K252D,K252E,K253,K253A,K253B,<br>K253C,K253D,K253E,K254,K254A,K254B,K254C,K254D,K254E,K254F,<br>K254G,K254H,K254I,K254J,K255,K255A,K255D,K255E,K255F,K255H,<br>K255I,K255J,K256,K256B,K256D,K256E,K256F,K256H,K256I,K256J,<br>K257,K257A,K257B,K257C,K257D,K257E,K259,K259A,K26,K260,<br>K260A,K261,K261A,K262,K262A,K263,K263A,K264,K264A,K264B,<br>K264C,K264D,K265,K265A,K265B,K265D,K266,K266A,K266B,K266C,<br>K266D,K267,K267A,K267B,K269,K27,K270,K271,K272,K273,<br>K274,K275,K276,K277,K279,K28,K280,K280A,K280B,K281,<br>K281A,K281B,K282,K282B,K283,K283A,K283B,K283C,K284,K284A,<br>K284B,K284C,K284D,K284E,K284F,K285,K285A,K285B,K285C,K285D, |

K285F, K286, K286A, K286B, K287, K287A, K287B, K287C, K289, K29, K290, K291, K293, K294, K295, K296, K296A, K296B, K296C, K297, K298, K298A, K299, K30, K309, K31, K310, K310A, K311, K311A, K312, K312A, K312B, K312C, K313, K314, K314A, K315, K315A, K315B, K316, K316A, K316B, K316C, K316D, K316E, K318, K318A, K318B, K318C, K318E, K318F, K318G, K318H, K319, K35, K350, K350A, K351, K351A, K359, K359A, K359B, K36, K369, K37, K379, K38, K380, K381, K381A, K382, K383, K388, K388A, K388B, K388C, K388D, K389, K40, K400, K401, K402, K402A, K403, K403A, K403B, K404, K409, K41, K410, K411, K412, K412A, K413, K413A, K413B, K414, K419, K42, K420, K420A, K420B, K421, K429, K43, K430, K430A, K430B, K431, K439, K439A, K439A1, K439A2, K439A3, K439A4, K44, K440, K440A, K440B, K441, K449, K45, K450, K450A, K450B, K450C, K450F, K450I, K451, K451A, K451C, K451E, K451F, K451H, K451I, K458, K458A, K458B, K458C, K458F, K458G, K458H, K458I, K458J, K458K, K458M, K458P, K46, K460, K460A, K460B, K461, K469, K51, K510, K511, K512, K512A, K513, K513A, K514, K515, K518, K518A, K518B, K519, K55, K550, K550A, K550B, K550C, K550D, K550E, K550F, K550G, K550H, K551, K551A, K551B, K551C, K551D, K551E, K551F, K552, K553, K553A, K553B, K553C, K558, K559, K56, K560, K560A, K560B, K561, K561A, K561B, K561C, K561D, K562, K562A, K562B, K562C, K563, K564, K564A, K564B, K565, K565A, K565B, K565C, K565D, K565E, K566, K566A, K566B, K566C, K566D, K566E, K566F, K566G, K566H, K567, K57, K570, K570A, K570B, K570C, K571, K571A, K571B, K572, K572A, K572B, K572C, K573, K573A, K573B, K573C, K573D, K573E, K573F, K574, K574A, K575, K578, K579, K579A, K58, K580, K580A, K589, K589A, K63, K630, K631, K631A, K632, K632A, K632B, K632C, K632D, K632E, K632F, K632G, K632H, K632I, K632J, K633, K634, K638, K638A, K638B, K638C, K638D, K638E, K638F, K639, K65, K650, K650A, K650B, K650C, K650D, K650E, K650F, K650G, K650H, K650I, K650J, K650K, K650L, K650M, K650N, K650O, K650P, K658, K658A, K658B, K658C, K658D, K658E, K658F, K658G, K658I, K659, K66, K660, K660A, K660B, K660C, K660D, K660E, K660F, K661, K668, K668A, K668B, K669, K72, K720, K720A, K720C, K720D, K720E, K720F, K721, K729, K73, K730, K731, K732, K732A, K732B, K732C, K732D, K732E, K732F, K732G, K738, K739, K74, K740, K740A, K740B, K741, K742, K743, K743A, K744, K745, K746, K746A, K746B, K746C, K746D, K746E, K746F, K746G, K75, K750, K750A, K750B, K750C, K750D, K751, K751A, K752, K753, K758, K759, K76, K760, K760A, K760B, K760C, K761, K761A, K762, K763, K764, K764A, K765, K766, K766A, K766B, K767, K768, K768A, K768B, K768C, K768E, K769, K80, K800, K800A, K800B, K800C, K800D, K801, K801A, K801B, K801C, K801D, K802, K802A, K802B, K802C, K802D, K802E, K802F, K803, K803A, K803B, K803C, K804, K804A, K804B, K804C, K804D, K804E, K805, K805A, K805B, K805C, K805D, K805E, K805F, K805G, K805H, K805I, K805J, K805K, K808, K81, K810, K810A, K810B, K810C, K810D, K811, K818, K819, K82, K820, K820A, K821, K822, K822A, K823, K823A, K823B, K824, K828, K828B, K828D, K828F, K828G, K828H, K828I, K828J, K828K, K829, K83, K830, K830A, K830B, K830C, K830D, K830E, K830F, K830G, K831, K831A, K831B, K832, K832A, K833, K833A, K833B, K834, K835, K838, K838B, K838D, K838E, K839, K85, K859, K859A, K859B, K859C, K859D, K859E, K859F, K86, K861, K861A, K861B, K861C, K861D, K862, K863, K868, K868A, K868B, K868C, K868D, K868E, K868F, K868G, K868I, K868L, K868M, K868N, K869

---

|                        |                                                                                                                                                           |
|------------------------|-----------------------------------------------------------------------------------------------------------------------------------------------------------|
| <b>endocrine – all</b> | <b>ICD-8:</b> 24009, 24019, 24099, 24109, 24119, 24199, 24200, 24201, 24208, 24209, 24219, 24220, 24228, 24229, 24400, 24401, 24402, 24403, 24408, 24409, |
|------------------------|-----------------------------------------------------------------------------------------------------------------------------------------------------------|

---

---

24500,24501,24502,24503,24504,24508,24509,24600,24609,25000,  
25001,25002,25003,25004,25005,25006,25007,25008,25009,25100,  
25101,25102,25103,25108,25109,25200,25201,25202,25203,25204,  
25205,25208,25209,25210,25211,25218,25219,25299,25300,25301,  
25302,25308,25309,25310,25311,25312,25313,25314,25315,25318,  
25319,25329,25390,25399,25499,25500,25501,25508,25509,25510,  
25511,25512,25518,25519,25529,25590,25599,25800,25801,25809,  
25819,25890,25891,25892,25899,26009,26010,26019,26089,26099,  
26199,26299,26309,26319,26380,26381,26389,26399,26401,26408,  
26409,26509,26519,26529,26599,26609,26680,26689,26699,26700,  
26708,26709,26899,26900,26901,26902,26909,26919,26990,26991,  
26992,26999,27400,27401,27408,27409,27509,27519,27529,27539,  
27549,27559,27590,27599,27600,27601,27602,27608,27609,27799,  
27809,27819,27829,27899,27900,27901,27902,27903,27904,27905,  
27906,27907,27908,27909

---

**ICD10:** E01,E010,E010A,E011,E011A,E012,E018,E02,E029,E03,  
E033,E034,E035,E038,E039,E04,E040,E041,E041A,E042,  
E042A,E048,E048A,E049,E05,E050,E050A,E050B,E050C,E050D,  
E051,E052,E053,E054,E055,E058,E058A,E058B,E059,E059A,  
E06,E060,E060A,E060B,E061,E061A,E061B,E061C,E062,E063,  
E063A,E063B,E063C,E065,E065A,E065C,E069,E07,E070,E070A,  
E078,E078A,E078B,E078E,E079,E11,E110,E110A,E110B,E110C,  
E110D,E110E,E111,E112,E113,E114,E115,E115A,E115B,E115C,  
E115D,E116,E117,E118,E119,E119A,E13,E130,E131,E132,  
E133,E134,E135,E136,E137,E138,E139,E14,E140,E140A,  
E140B,E140C,E140D,E141,E142,E143,E144,E145,E145A,E145B,  
E145C,E145D,E146,E147,E148,E149,E16,E161,E161A,E161B,  
E161C,E161D,E162,E163,E168,E168A,E168C,E168E,E169,E20,  
E200,E201,E208,E209,E21,E210,E210A,E210B,E211,E212,  
E213,E213A,E213B,E214,E215,E22,E220,E220A,E220C,E221,  
E222,E229,E23,E230,E230A,E230B,E230C,E230D,E230E,E230F,  
E230G,E230H,E230I,E232,E233,E236,E236A,E236B,E236C,E236E,  
E237,E24,E240,E241,E243,E248,E249,E26,E260,E260A,  
E260B,E261,E268,E268A,E269,E27,E271,E271A,E272,E272A,  
E274,E274A,E274B,E274C,E274D,E274E,E275,E275A,E278,E279,  
E31,E310,E310A,E311,E318,E319,E32,E320,E321,E328,  
E329,E34,E340,E341,E342,E349,E40,E409,E41,E419,  
E42,E429,E43,E439,E439A,E44,E440,E441,E45,E459,  
E46,E469,E47,E470,E50,E500,E501,E502,E503,E504,  
E505,E506,E507,E507A,E508,E508A,E509,E51,E511,E512,  
E513,E519,E52,E529,E529A,E53,E530,E531,E538,E538A,  
E538B,E538C,E538D,E538E,E539,E549,E55,E559,E56,E560,  
E561,E568,E569,E58,E589,E59,E599,E599A,E60,E609,  
E609A,E609B,E609C,E609D,E61,E610,E611,E612,E613,E614,  
E615,E616,E617,E618,E619,E63,E630,E631,E638,E639,  
E64,E640,E641,E642,E643,E648,E648A,E649,E649A,E649B,  
E65,E658,E658A,E658B,E659,E66,E660,E660A,E660B,E660C,  
E660D,E660E,E660F,E660G,E660H,E662,E662A,E668,E669,E67,  
E670,E671,E672,E673,E678,E68,E689,E78,E780,E780A,  
E780C,E780D,E780E,E781,E781A,E781B,E781C,E781D,E781E,E782,  
E782A,E782B,E782C,E782D,E782E,E782F,E782G,E782H,E782I,E782J,  
E783,E783A,E785

---

**endocrine – obesity ICD-8: 27799**

---

---

**ICD10:** E66,E660,E660A,E660B,E660C,E660D,E660E,E660F,E660G,E660H,  
E662,E662A,E668,E669

---

**genitourinary – all**

**ICD-8:** 58000,58001,58002,58008,58009,58199,58200,58201,58202,58208,  
58209,58300,58301,58302,58308,58309,58499,59009,59010,59011,  
59012,59013,59014,59015,59019,59020,59021,59029,59099,59100,  
59101,59108,59109,59200,59201,59202,59203,59204,59205,59208,  
59209,59309,59319,59320,59321,59322,59323,59324,59325,59326,  
59327,59329,59330,59331,59338,59339,59340,59341,59349,59350,  
59351,59352,59359,59400,59401,59409,59500,59501,59502,59503,  
59504,59508,59509,59600,59601,59602,59603,59604,59605,59606,  
59607,59608,59609,59700,59701,59702,59703,59708,59709,59800,  
59801,59802,59803,59808,59809,59900,59901,59902,59903,59904,  
59905,59906,59909,60100,60101,60102,60103,60108,60109,61200,  
61201,61202,61203,61204,61208,61209,61300,61301,61302,61303,  
61304,61308,61309,61499,61600,61601,61602,61603,61608,61609,  
61619,61629,61690,61699,62009,62090,62099

---

**ICD10:** N00,N000,N001,N002,N003,N004,N005,N005A,N005C,N006,  
N007,N008,N008A,N008B,N009,N01,N010,N011,N012,N013,  
N014,N015,N015C,N016,N017,N018,N018A,N018B,N019,N03,  
N030,N031,N032,N033,N034,N035,N035A,N035C,N036,N037,  
N038,N038A,N038B,N039,N05,N050,N051,N052,N053,N054,  
N055,N055B,N055C,N056,N057,N058,N058A,N058B,N059,N06,  
N060,N061,N062,N063,N064,N065,N065C,N066,N067,N068,  
N068A,N068B,N069,N10,N109,N11,N110,N110A,N111,N111A,  
N111B,N112,N118,N119,N12,N129,N13,N130,N131,N131A,  
N132,N132A,N132B,N133,N133A,N134,N135,N135A,N135B,N135C,  
N136,N136A,N136B,N136C,N136D,N137,N138,N138A,N139,N139A,  
N139B,N15,N150,N151,N151A,N151B,N158,N159,N17,N170,  
N170A,N171,N171A,N172,N172B,N172C,N178,N179,N18,N180,  
N188,N188A,N188B,N189,N19,N199,N20,N200,N200A,N200F,  
N200I,N200M,N200S,N200X,N200X1,N200X2,N200Y,N200Z,N201,N201A,  
N201F,N201I,N201M,N201S,N201X,N201Y,N201Z,N202,N202A,N202F,  
N202I,N202M,N202S,N202X,N202X2,N202Y,N202Z,N209,N209A,N21,  
N210,N210A,N211,N218,N219,N23,N239,N25,N250,N250B,  
N250C,N250D,N251,N258,N258A,N258B,N258C,N259,N26,N269,  
N27,N270,N271,N279,N28,N280,N280A,N280B,N280D,N281,  
N288,N288A,N288B,N288D,N288E,N288F,N288G,N288H,N289,N289A,  
N30,N300,N301,N302,N303,N303A,N308,N308A,N308B,N308C,  
N308D,N308E,N308F,N308G,N308H,N308J,N308K,N309,N31,N310,  
N311,N312,N318,N318A,N319,N319B,N32,N320,N320A,N320B,  
N321,N321A,N322,N323,N324,N325,N325A,N325B,N328,N328A,  
N328B,N328C,N328D,N328E,N329,N34,N340,N340A,N340B,N340C,  
N341,N342,N342A,N342B,N342C,N342D,N342E,N342F,N342G,N343,  
N35,N351,N358,N358A,N359,N36,N360,N360A,N360B,N360C,  
N361,N362,N363,N368,N368A,N368C,N368D,N368E,N369,N39,  
N391,N392,N394,N394A,N394B,N394C,N398,N399,N41,N410,  
N411,N412,N412A,N413,N413A,N418,N419,N679,N70,N700,  
N700A,N700B,N700C,N700D,N700E,N700F,N700G,N701,N701A,N701B,  
N701C,N701D,N701E,N701F,N701G,N701H,N702,N709,N709B,N709C,  
N71,N710,N710A,N710B,N710C,N710D,N710E,N710F,N711,N711A,  
N711B,N711C,N711D,N711F,N719,N72,N729,N729A,N729B,N729C,  
N729D,N729E,N729F,N73,N730,N730B,N730C,N730E,N731,N731B,  
N731C,N732,N732A,N732B,N732C,N732E,N733,N733A,N734,N734A,  
N735,N735A,N736,N736A,N736B,N738,N738A,N738B,N738C,N739

---

|                                                  |                                                                                                                                                                                                                                                                                                                                                                                                                                                                                                                                                                                                                                                                                                                                                                                                                                                                                                                                                                                                                                                                                                                                                                                                                                                                                                                                                                                                                                                                                                                                                                                                                                                                                                                                                                                                                                                                                                                                                                                                                                                                                                                                                                                                                                                                                                                                                                                                                                                                                                                                                                                                                                                                                                                                                                                                                                                                                                                                                                                                                                                                                                                        |
|--------------------------------------------------|------------------------------------------------------------------------------------------------------------------------------------------------------------------------------------------------------------------------------------------------------------------------------------------------------------------------------------------------------------------------------------------------------------------------------------------------------------------------------------------------------------------------------------------------------------------------------------------------------------------------------------------------------------------------------------------------------------------------------------------------------------------------------------------------------------------------------------------------------------------------------------------------------------------------------------------------------------------------------------------------------------------------------------------------------------------------------------------------------------------------------------------------------------------------------------------------------------------------------------------------------------------------------------------------------------------------------------------------------------------------------------------------------------------------------------------------------------------------------------------------------------------------------------------------------------------------------------------------------------------------------------------------------------------------------------------------------------------------------------------------------------------------------------------------------------------------------------------------------------------------------------------------------------------------------------------------------------------------------------------------------------------------------------------------------------------------------------------------------------------------------------------------------------------------------------------------------------------------------------------------------------------------------------------------------------------------------------------------------------------------------------------------------------------------------------------------------------------------------------------------------------------------------------------------------------------------------------------------------------------------------------------------------------------------------------------------------------------------------------------------------------------------------------------------------------------------------------------------------------------------------------------------------------------------------------------------------------------------------------------------------------------------------------------------------------------------------------------------------------------------|
| <p><b>genitourinary – kidney infection *</b></p> | <p><b>ICD-8:</b> 59009,59010,59011,59012,59013,59014,59015,59019,59020,59021,59029,59099</p> <hr/> <p><b>ICD10:</b> N10,N109,N11,N110,N110A,N111,N111A,N111B,N112,N118,N119,N12,N129</p> <p><i>* does not include urinary tract infections (N39.0, 599.0)</i></p> <hr/> <p><b>musculoskeletal – all</b></p> <p><b>ICD-8:</b> 71000,71001,71002,71003,71004,71008,71009,71199,71219,71229,71239,71249,71259,71300,71301,71302,71303,71304,71305,71306,71308,71309,71310,71311,71312,71313,71314,71315,71318,71319,71490,71491,71492,71493,71494,71499,71599,71609,71619,71709,71719,71729,71790,71791,71799,71899,72000,72001,72002,72003,72008,72009,72010,72011,72012,72013,72018,72019,72029,72030,72031,72032,72038,72039,72199,72220,72221,72222,72223,72224,72225,72289,72299,72309,72319,72390,72391,72392,72393,72394,72395,72399,72409,72419,72499,72500,72501,72509,72510,72511,72519,72589,72599,72699,72709,72719,72729,72739,72749,72759,72769,72779,72789,72799,72809,72819,72829,72839,72849,72859,72869,72879,72889,72890,72899,72900,72901,72902,72903,72904,72905,72906,72907,72909,73099,73100,73101,73102,73103,73104,73105,73108,73109,73299,73309,73319,73390,73391,73392,73393,73399,73400,73401,73402,73408,73409,73419,73490,73491,73499,73500,73501,73502,73503,73504,73508,73509,73699,73799,73800,73801,73802,73803,73804,73805,73806,73809</p> <hr/> <p><b>ICD10:</b> M00,M000,M000A,M000B,M001,M001A,M002,M002A,M002B,M008,M009,M02,M021,M022,M023,M028,M029,M05,M050,M050A,M051,M051B,M051C,M051D,M051E,M051F,M052,M053,M053A,M053C,M053D,M053E,M058,M059,M06,M060,M061,M062,M063,M064,M068,M069,M11,M110,M112,M112A,M118,M119,M12,M120,M121,M122,M123,M124,M128,M128A,M13,M130,M131,M138,M138A,M139,M15,M150,M151,M152,M153,M153A,M154,M158,M159,M16,M160,M161,M161A,M161B,M162,M163,M163A,M163B,M166,M167,M167A,M167B,M169,M17,M170,M171,M171A,M171B,M174,M175,M175A,M175B,M179,M18,M180,M181,M181A,M181B,M184,M185,M185A,M185B,M189,M19,M190,M190A,M192,M192A,M198,M198A,M199,M30,M300,M301,M303,M308,M308A,M31,M310,M310A,M310B,M311,M311A,M311B,M312,M313,M314,M315,M315A,M316,M316A,M318,M318A,M318B,M319,M33,M331,M332,M339,M34,M340,M341,M348,M348A,M348B,M348C,M349,M35,M350,M350A,M350B,M350C,M350D,M350E,M351,M351A,M352,M353,M354,M355,M356,M358,M359,M40,M400,M401,M401A,M402,M402A,M403,M404,M404A,M404B,M404C,M405,M41,M412,M413,M413A,M415,M415A,M415B,M418,M419,M42,M421,M429,M43,M430,M431,M432,M432A,M433,M434,M434A,M435,M435A,M436,M438,M439,M45,M459,M459A,M459B,M46,M460,M461,M462,M463,M463A,M464,M465,M465A,M468,M469,M47,M470,M470A,M470B,M471,M471A,M471B,M471C,M472,M472A,M472B,M478,M478A,M478B,M478C,M478D,M478E,M479,M48,M480,M481,M481A,M482,M482A,M483,M484,M485,M485A,M485B,M488,M488A,M489,M50,M500,M500A,M500B,M500C,M500D,M500E,M500F,M501,M501A,M501B,M501C,M501D,M501E,M501F,M502,M503,M508,M509,M51,M510,M510A,M510B,M510C,M510D,M510E,M510F,M510G,M511,M511A,M511B,M511C,M511D,M511E,M511F,M511H,M511I,M512,M512A,M512B,M512C,M512D,M512E,M512F,M512G,M513,M513A,M513B,M513C,M514,M518,M519,M53,M530,M530A,M531,M532,M533,M533A,M533B,M538,</p> |
|--------------------------------------------------|------------------------------------------------------------------------------------------------------------------------------------------------------------------------------------------------------------------------------------------------------------------------------------------------------------------------------------------------------------------------------------------------------------------------------------------------------------------------------------------------------------------------------------------------------------------------------------------------------------------------------------------------------------------------------------------------------------------------------------------------------------------------------------------------------------------------------------------------------------------------------------------------------------------------------------------------------------------------------------------------------------------------------------------------------------------------------------------------------------------------------------------------------------------------------------------------------------------------------------------------------------------------------------------------------------------------------------------------------------------------------------------------------------------------------------------------------------------------------------------------------------------------------------------------------------------------------------------------------------------------------------------------------------------------------------------------------------------------------------------------------------------------------------------------------------------------------------------------------------------------------------------------------------------------------------------------------------------------------------------------------------------------------------------------------------------------------------------------------------------------------------------------------------------------------------------------------------------------------------------------------------------------------------------------------------------------------------------------------------------------------------------------------------------------------------------------------------------------------------------------------------------------------------------------------------------------------------------------------------------------------------------------------------------------------------------------------------------------------------------------------------------------------------------------------------------------------------------------------------------------------------------------------------------------------------------------------------------------------------------------------------------------------------------------------------------------------------------------------------------------|

---

M539,M54,M540,M540A,M540B,M541,M541A,M541B,M541C,M541D,  
M542,M543,M544,M545,M545A,M546,M548,M549,M60,M600,  
M600A,M601,M602,M602B,M608,M609,M61,M610,M611,M612,  
M612A,M612B,M613,M614,M615,M619,M619A,M62,M620,M620A,  
M621,M621A,M622,M623,M624,M625,M625A,M626,M628,M628A,  
M628B,M629,M65,M650,M651,M652,M653,M653A,M654,M658,  
M658A,M658B,M659,M659A,M659B,M66,M660,M661,M661A,M662,  
M663,M664,M665,M67,M670,M671,M672,M673,M674,M678,  
M679,M71,M710,M711,M712,M713,M713A,M714,M715,M718,  
M719,M72,M720,M721,M722,M723,M724,M725,M725A,M725B,  
M728,M728A,M728B,M728C,M729,M75,M750,M751,M751A,M751B,  
M751C,M752,M753,M753A,M754,M755,M758,M759,M76,M760,  
M761,M762,M763,M763B,M764,M765,M766,M766A,M766B,M767,  
M768,M768A,M768B,M769,M77,M770,M771,M772,M773,M774,  
M775,M778,M779,M779A,M79,M790,M790A,M790B,M791,M792,  
M792A,M792B,M793,M793A,M793B,M793C,M793F,M794,M795,M796,  
M797,M798,M798A,M798B,M798C,M798D,M799,M80,M800,M801,  
M802,M805,M808,M809,M809A,M809B,M809C,M809D,M81,M810,  
M811,M812,M815,M816,M818,M818A,M819,M83,M830,M831,  
M832,M832A,M833,M838,M839,M84,M840,M841,M842,M843,  
M844,M844A,M848,M849,M85,M850,M851,M852,M852A,M853,  
M854,M855,M856,M858,M858A,M859,M86,M860,M861,M862,  
M863,M864,M865,M865A,M866,M868,M868A,M869,M869A,M869B,  
M869C,M87,M870,M873,M878,M879,M88,M880,M888,M889,  
M89,M890,M890A,M891,M892,M893,M894,M894C,M895,M896,  
M898,M898A,M898B,M899,M93,M930,M931,M932,M932A,M932B,  
M938,M939,M94,M940,M941,M942,M943,M948,M948A,M948B,  
M948D,M948E,M948F,M948G,M949

---

**neoplasms – all**

**ICD-8:** 14009,14019,14029,14099,14109,14119,14129,14139,14199,14209,  
14280,14281,14289,14299,14309,14319,14399,14499,14509,14519,  
14589,14599,14609,14689,14699,14700,14701,14702,14708,14709,  
14809,14819,14889,14899,14999,15000,15001,15002,15008,15009,  
15109,15119,15180,15181,15182,15189,15199,15209,15280,15281,  
15289,15299,15300,15301,15302,15309,15319,15329,15339,15380,  
15389,15399,15409,15410,15411,15419,15429,15509,15519,15589,  
15609,15610,15611,15618,15619,15629,15699,15709,15780,15781,  
15789,15799,15809,15899,15999,16009,16019,16029,16089,16099,  
16109,16180,16181,16189,16199,16209,16210,16211,16212,16213,  
16214,16215,16216,16218,16219,16309,16319,16399,17009,17019,  
17029,17039,17049,17059,17069,17079,17089,17099,17109,17119,  
17129,17139,17199,17209,17219,17229,17230,17239,17249,17259,  
17260,17261,17262,17269,17279,17289,17299,17309,17319,17329,  
17330,17339,17349,17359,17360,17361,17362,17369,17379,17389,  
17399,17400,17401,17402,17408,17409,18000,18001,18002,18003,  
18008,18009,18199,18200,18201,18202,18203,18208,18209,18299,  
18300,18301,18302,18303,18308,18309,18319,18399,18400,18401,  
18409,18419,18489,18499,18599,18699,18700,18701,18702,18708,  
18709,18780,18789,18799,18800,18801,18802,18808,18809,18909,  
18919,18929,18990,18991,18992,18999,19000,19001,19002,19003,  
19004,19008,19009,19100,19101,19102,19103,19104,19105,19106,  
19107,19108,19109,19200,19201,19208,19209,19219,19220,19228,  
19229,19239,19249,19259,19299,19399,19409,19419,19429,19439,  
19449,19489,19499,19509,19519,19590,19591,19593,19599,19609,  
19619,19629,19639,19649,19679,19689,19699,19709,19719,19729,

---



---

19739,19749,19759,19769,19779,19789,19799,19809,19810,19819,  
19829,19839,19841,19842,19849,19850,19851,19859,19890,19891,  
19892,19899,19909,19910,19919,20009,20019,20199,20209,20219,  
20220,20229,20290,20299,20399,20409,20419,20499,20509,20519,  
20599,20609,20619,20699,20709,20719,20729,20799,20899,20900,  
20901,20902,20908,20909,21009,21019,21020,21021,21022,21029,  
21039,21040,21041,21042,21049,21059,21069,21079,21089,21099,  
21109,21119,21120,21121,21122,21128,21129,21130,21131,21132,  
21133,21134,21135,21136,21138,21139,21149,21150,21151,21152,  
21158,21159,21169,21170,21171,21179,21199,21200,21201,21202,  
21203,21204,21209,21219,21229,21230,21231,21239,21249,21259,  
21299,21300,21301,21302,21303,21304,21305,21306,21307,21308,  
21309,21499,21500,21501,21502,21503,21508,21509,21600,21601,  
21602,21603,21604,21605,21606,21607,21608,21609,21619,21629,  
21689,21699,21700,21701,21702,21708,21709,21899,21909,21919,  
21990,21991,21999,22099,22100,22101,22102,22109,22119,22129,  
22189,22199,22209,22219,22280,22281,22289,22299,22309,22319,  
22329,22330,22331,22332,22338,22339,22380,22389,22399,22400,  
22401,22402,22403,22404,22408,22409,22500,22501,22502,22503,  
22504,22505,22506,22507,22508,22509,22510,22511,22518,22519,  
22520,22521,22522,22523,22524,22525,22528,22529,22530,22531,  
22539,22549,22559,22569,22599,22609,22619,22620,22621,22629,  
22639,22689,22699,22700,22701,22702,22703,22709,22899,23009,  
23019,23020,23021,23022,23028,23029,23030,23031,23032,23033,  
23034,23035,23036,23038,23039,23049,23050,23051,23052,23058,  
23059,23069,23079,23099,23101,23102,23103,23104,23108,23109,  
23119,23129,23130,23131,23139,23149,23159,23199,23200,23201,  
23202,23203,23204,23205,23206,23208,23209,23210,23211,23212,  
23213,23218,23219,23220,23221,23222,23223,23224,23225,23226,  
23227,23228,23229,23300,23301,23302,23308,23309,23409,23419,  
23490,23499,23590,23599,23609,23610,23618,23619,23620,23628,  
23629,23689,23699,23709,23719,23720,23721,23729,23739,23749,  
23759,23769,23799,23800,23801,23802,23803,23804,23808,23809,  
23819,23829,23839,23849,23859,23869,23879,23899,23909,23919,  
23999

---

**ICD10:** C00,C000,C001,C002,C003,C004,C005,C006,C008,  
C009,C01,C019,C02,C020,C021,C021A,C021B,C022,C022A,  
C023,C024,C028,C029,C03,C030,C031,C039,C04,C040,  
C041,C048,C049,C05,C050,C051,C052,C058,C059,C06,  
C060,C061,C062,C068,C069,C07,C079,C08,C080,C081,  
C088,C089,C09,C090,C090A,C090B,C091,C091A,C091B,C092,  
C098,C099,C10,C100,C101,C102,C103,C104,C104A,C108,  
C109,C11,C110,C111,C112,C113,C118,C119,C12,C129,  
C13,C130,C131,C132,C138,C139,C14,C140,C141,C142,  
C148,C15,C150,C151,C152,C153,C154,C155,C158,C159,  
C16,C160,C161,C162,C163,C164,C165,C166,C168,C169,  
C17,C170,C171,C172,C173,C178,C179,C18,C180,C180A,  
C181,C182,C183,C184,C185,C186,C187,C188,C188A,C189,  
C19,C199,C20,C209,C21,C210,C210D,C210H,C210J,C210K,  
C210L,C210M,C210R,C210V,C210W,C210Z,C211,C212,C218,C22,  
C220,C221,C222,C223,C224,C227,C229,C23,C239,C24,  
C240,C240A,C240B,C240C,C240D,C240E,C241,C248,C249,C25,  
C250,C251,C252,C253,C254,C257,C258,C259,C26,C260,  
C261,C268,C269,C30,C300,C300A,C300B,C300C,C301,C301B,

---

---

C31,C310,C311,C312,C313,C318,C319,C32,C320,C320A,  
C321,C321A,C321B,C321C,C321D,C322,C323,C328,C329,C33,  
C339,C34,C340,C340A,C341,C342,C343,C348,C349,C37,  
C379,C38,C380,C380A,C381,C382,C383,C384,C388,C39,  
C390,C398,C399,C40,C400,C400C,C400D,C401,C402,C402B,  
C403,C403A,C403B,C408,C408B,C409,C409B,C41,C410,C410A,  
C410B,C410D,C411,C412,C412A,C413,C413A,C413E,C413F,C414,  
C414E,C414F,C418,C418B,C419,C419B,C43,C430,C430E,C430F,  
C431,C431A,C431B,C431F,C431J,C432,C432A,C432F,C432Z,C433,  
C433E,C433F,C433G,C433J,C434,C434A,C434B,C434E,C434F,C434G,  
C434K,C434Z,C435,C435A,C435B,C435C,C435D,C435E,C435F,C435G,  
C435Z,C436,C436B,C436C,C436E,C436F,C436G,C436Z,C437,C437A,  
C437B,C437C,C437E,C437F,C437G,C437H,C437J,C437Z,C438,C438E,  
C438F,C438G,C438Z,C439,C439F,C439G,C439J,C439K,C439Z,C44,  
C440,C440D,C440E,C440F,C440H,C440J,C440K,C440Q,C440T,C440V,  
C440Z,C441,C441A,C441B,C441D,C441E,C441F,C441G,C441H,C441J,  
C441K,C441T,C441Z,C442,C442A,C442B,C442C,C442D,C442E,C442F,  
C442H,C442J,C442K,C442L,C442M,C442P,C443,C443A,C443D,C443E,  
C443F,C443G,C443H,C443J,C443K,C443M,C443P,C443R,C443S,C443Z,  
C444,C444A,C444B,C444D,C444E,C444F,C444G,C444H,C444J,C444K,  
C444M,C444P,C444S,C444V,C444W,C444Z,C445,C445A,C445B,C445C,  
C445D,C445E,C445F,C445G,C445H,C445J,C445K,C445L,C445M,C445N,  
C445P,C445R,C445U,C445V,C445W,C445Z,C446,C446A,C446B,C446C,  
C446D,C446E,C446G,C446H,C446J,C446K,C446L,C446M,C446P,C446Z,  
C447,C447B,C447C,C447D,C447E,C447F,C447G,C447H,C447J,C447K,  
C447L,C447M,C447P,C447R,C447V,C447W,C447Z,C448,C448D,C448E,  
C448F,C448G,C448H,C448K,C448P,C448W,C449,C449D,C449E,C449F,  
C449G,C449H,C449J,C449K,C449L,C449M,C449N,C449P,C449Q,C449R,  
C449T,C449V,C449Z,C45,C450,C451,C452,C457,C459,C46,  
C460,C461,C462,C463,C467,C468,C469,C47,C470,C471,  
C471A,C472,C473,C473A,C474,C474B,C475,C476,C478,C479,  
C48,C480,C481,C481A,C481B,C481C,C482,C488,C49,C490,  
C490A,C490B,C490C,C491,C491A,C491B,C492,C492A,C492B,C493,  
C493A,C494,C495,C495A,C496,C498,C498A,C499,C50,C500,  
C500A,C500B,C500C,C500D,C501,C502,C503,C504,C505,C506,  
C508,C509,C51,C510,C510A,C511,C512,C518,C519,C519E,  
C519H,C519K,C519M,C519R,C519Z,C52,C529,C53,C530,C531,  
C532,C533,C534,C538,C539,C54,C540,C541,C542,C543,  
C544,C545,C546,C548,C549,C55,C559,C56,C560,C561,  
C562,C563,C569,C57,C570,C571,C572,C573,C574,C577,  
C578,C579,C58,C589,C60,C600,C601,C602,C608,C609,  
C609D,C609J,C609R,C609Z,C61,C619,C62,C620,C621,C629,  
C629A,C63,C630,C631,C632,C637,C638,C639,C64,C649,  
C65,C659,C66,C669,C67,C670,C671,C672,C673,C674,  
C675,C675A,C676,C677,C678,C679,C68,C680,C681,C688,  
C689,C69,C690,C691,C692,C692A,C693,C694,C694A,C695,  
C695A,C695B,C696,C697,C698,C699,C70,C700,C701,C709,  
C71,C710,C710A,C710B,C711,C712,C713,C714,C715,C716,  
C717,C717A,C717B,C717C,C718,C719,C72,C720,C721,C722,  
C722A,C723,C724,C725,C728,C729,C73,C739,C74,C740,  
C741,C749,C75,C750,C751,C752,C753,C754,C755,C755B,  
C758,C759,C76,C760,C760A,C760B,C760C,C761,C762,C763,  
C764,C765,C767,C768,C77,C770,C770A,C770B,C770C,C770D,  
C770E,C770F,C770G,C770H,C771,C771A,C771B,C772,C772A,C772B,

---

---

C773,C773A,C773B,C773C,C773D,C774,C774A,C774B,C774C,C774D,  
C775,C775A,C775B,C778,C778A,C778B,C779,C779A,C779B,C78,  
C780,C781,C782,C783,C784,C785,C785A,C785B,C786,C786A,  
C786B,C786C,C787,C788,C79,C790,C790A,C790B,C791,C791I,  
C791J,C791S,C791T,C791U,C791V,C791X,C792,C793,C793A,C793B,  
C793C,C794,C795,C795A,C795B,C796,C797,C798,C80,C809,  
C81,C810,C811,C812,C813,C817,C819,C82,C820,C821,  
C822,C827,C829,C83,C830,C831,C832,C833,C834,C835,  
C836,C837,C838,C839,C84,C840,C840A,C840B,C840C,C841,  
C842,C843,C844,C844A,C844D,C844E,C845,C845A,C845B,C845D,  
C85,C850,C851,C851A,C851B,C851C,C851D,C851E,C857,C857A,  
C859,C859A,C859B,C88,C880,C881,C882,C883,C887,C889,  
C90,C900,C901,C902,C902A,C91,C910,C911,C912,C913,  
C914,C914A,C915,C917,C917A,C919,C92,C920,C921,C922,  
C923,C923B,C924,C925,C927,C927A,C929,C93,C930,C931,  
C932,C937,C939,C94,C940,C941,C942,C943,C943A,C944,  
C945,C947,C95,C950,C950A,C950B,C951,C952,C957,C959,  
C96,C960,C961,C962,C963,C967,C967A,C969,C97,C979,  
D00,D000,D000A,D000B,D000C,D001,D002,D01,D010,D011,  
D012,D013,D013A,D013B,D014,D015,D015A,D015B,D017,D019,  
D02,D020,D021,D022,D022B,D023,D023B,D024,D03,D030,  
D031,D031B,D031E,D032,D032E,D033,D033E,D033F,D034,D034A,  
D034B,D034E,D034F,D035,D035A,D035B,D035C,D035E,D035F,D036,  
D036A,D036B,D036E,D036F,D037,D037A,D037E,D038,D038E,D038F,  
D039,D039E,D039F,D04,D040,D040E,D040Z,D041,D041A,D041B,  
D041D,D041Z,D042,D042A,D042B,D042D,D043,D043A,D043B,D043D,  
D043Z,D044,D044A,D044B,D044D,D044Z,D045,D045A,D045B,D045C,  
D045D,D045E,D045Z,D046,D046B,D046D,D046G,D046Z,D047,D047A,  
D047D,D047Z,D048,D048D,D048E,D048Z,D049,D049D,D049E,D049Z,  
D05,D050,D051,D057,D059,D06,D060,D061,D067,D069,  
D07,D070,D071,D071D,D071E,D071G,D071Z,D072,D073,D074,  
D074D,D074E,D074Z,D075,D076,D076A,D076T,D09,D090,D091,  
D092,D093,D093A,D097,D099,D10,D100,D101,D101A,D102,  
D103,D103A,D103B,D104,D104A,D105,D106,D107,D109,D11,  
D110,D117,D117A,D117B,D119,D12,D120,D120A,D121,D122,  
D123,D123A,D123B,D124,D125,D126,D126A,D126B,D126C,D126F,  
D127,D128,D129,D129A,D129B,D13,D130,D131,D132,D133,  
D133A,D134,D134A,D135,D136,D137,D137A,D137B,D139,D14,  
D140,D140A,D140B,D140C,D141,D142,D143,D143A,D143B,D144,  
D15,D150,D151,D152,D157,D159,D16,D160,D160A,D160C,  
D160D,D161,D161A,D161B,D162,D162A,D162B,D163,D163A,D163B,  
D163C,D164,D164A,D164C,D164D,D165,D165A,D166,D166B,D167,  
D167A,D167B,D167D,D167E,D167F,D168,D168B,D168D,D168E,D168F,  
D169,D169A,D169B,D17,D170,D170A,D170B,D170C,D170D,D170E,  
D170F,D171,D171A,D171B,D172,D172A,D172B,D173,D173A,D173B,  
D174,D175,D176,D177,D177A,D177B,D179,D18,D180,D180A,  
D180B,D180C,D180D,D180E,D180F,D181,D181A,D181B,D189,D19,  
D190,D191,D192,D192D,D193,D194,D195,D196,D197,D199,  
D20,D200,D201,D21,D210,D210A,D210B,D210C,D211,D211A,  
D211B,D212,D212A,D212B,D213,D214,D215,D216,D217,D217A,  
D219,D22,D220,D220D,D220E,D220G,D220P,D220Z,D221,D221A,  
D221B,D221D,D221G,D221N,D221P,D222,D222A,D222B,D222D,D222F,  
D222G,D222P,D223,D223A,D223D,D223E,D223F,D223G,D223H,D223K,  
D223L,D223N,D223P,D223Q,D223V,D223Z,D224,D224A,D224B,D224D,

---

---

D224E,D224F,D224G,D224L,D224P,D224Q,D224V,D225,D225B,D225D,  
D225E,D225F,D225G,D225H,D225K,D225L,D225M,D225P,D225Q,D225V,  
D225Z,D226,D226B,D226D,D226E,D226F,D226G,D226N,D226P,D226V,  
D226Z,D227,D227A,D227B,D227D,D227E,D227F,D227G,D227H,D227P,  
D227V,D228,D228A,D228D,D228E,D228G,D228H,D228L,D228N,D228P,  
D228Q,D229,D229D,D229E,D229F,D229G,D229H,D229K,D229L,D229M,  
D229N,D229P,D229Q,D229V,D229Z,D23,D230,D2301,D2308,D230D,  
D230F,D230H,D230J,D230K,D230L,D230Q,D230T,D230U,D230X,D231,  
D2318,D231A,D231B,D231D,D231F,D231H,D231I,D231J,D231K,D231L,  
D231Q,D231T,D231X,D232,D2328,D232A,D232B,D232D,D232F,D232H,  
D232J,D232L,D232N,D232Q,D232R,D232X,D233,D2331,D2338,D233D,  
D233F,D233G,D233H,D233I,D233L,D233Q,D233R,D233T,D233X,D233Y,  
D233Z,D234,D2341,D2348,D234A,D234B,D234D,D234F,D234G,D234H,  
D234I,D234J,D234L,D234N,D234Q,D234R,D234T,D234X,D235,D2351,  
D2358,D235A,D235B,D235C,D235D,D235H,D235I,D235J,D235K,D235L,  
D235M,D235N,D235Q,D235R,D235T,D235X,D235Y,D236,D2361,D2368,  
D236B,D236D,D236E,D236H,D236I,D236J,D236K,D236L,D236N,D236R,  
D236X,D237,D2371,D2378,D237A,D237B,D237D,D237E,D237H,D237J,  
D237K,D237L,D237M,D237N,D237R,D237S,D237X,D237Y,D238,D2381,  
D2388,D238D,D238E,D238G,D238H,D238J,D238L,D238N,D238Q,D238R,  
D238X,D238Y,D238Z,D239,D2391,D2392,D2398,D239A,D239D,D239E,  
D239G,D239H,D239I,D239J,D239K,D239L,D239M,D239N,D239Q,D239R,  
D239T,D239X,D239Z,D24,D249,D249A,D249B,D249C,D249D,D249E,  
D249F,D249G,D249W,D25,D250,D250A,D250B,D250C,D251,D252,  
D259,D26,D260,D261,D267,D269,D27,D270,D271,D272,  
D278,D279,D28,D280,D281,D282,D282A,D282C,D287,D289,  
D2891,D2898,D289H,D289M,D289N,D289Q,D289R,D289X,D29,D290,  
D291,D292,D293,D294,D297,D297A,D297C,D299,D2998,D299J,  
D299K,D299L,D299M,D299Q,D299T,D299X,D30,D300,D301,D302,  
D303,D304,D307,D309,D31,D310,D311,D312,D313,D314,  
D315,D315A,D315B,D316,D316A,D317,D319,D32,D320,D321,  
D329,D329A,D33,D330,D330A,D330B,D330C,D330D,D331,D331A,  
D331B,D331C,D331D,D332,D333,D333A,D333B,D334,D337,D339,  
D34,D349,D35,D350,D350A,D351,D352,D352A,D353,D354,  
D355,D356,D356B,D356C,D357,D358,D359,D36,D360,D361,  
D361A,D367,D369,D37,D370,D370A,D370B,D370C,D371,D372,  
D373,D374,D375,D375A,D376,D376A,D376B,D376C,D377,D379,  
D38,D380,D381,D381A,D381B,D381C,D382,D383,D384,D385,  
D385A,D385B,D385C,D389,D39,D390,D391,D391A,D392,D392A,  
D392B,D397,D399,D40,D400,D401,D407,D409,D41,D410,  
D411,D412,D413,D414,D417,D419,D42,D420,D421,D429,  
D43,D430,D430B,D430C,D430D,D430E,D430F,D431,D431A,D431B,  
D431C,D431D,D431E,D431F,D432,D433,D434,D437,D439,D44,  
D440,D441,D442,D443,D444,D445,D446,D447,D447B,D448,  
D449,D45,D459,D46,D460,D461,D462,D463,D464,D467,  
D469,D47,D470,D470A,D471,D471A,D472,D473,D474,D477,  
D477A,D479,D48,D480,D481,D482,D483,D484,D485,D486,  
D487,D487A,D487B,D487C,D487D,D489

---

**neoplasms – benign ICD-8:** 21009,21019,21020,21021,21022,21029,21039,21040,21041,21042,  
21049,21059,21069,21079,21089,21099,21109,21119,21120,21121,  
21122,21128,21129,21130,21131,21132,21133,21134,21135,21136,  
21138,21139,21149,21150,21151,21152,21158,21159,21169,21170,  
21171,21179,21199,21200,21201,21202,21203,21204,21209,21219,  
21229,21230,21231,21239,21249,21259,21299,21300,21301,21302,

---

---

21303,21304,21305,21306,21307,21308,21309,21499,21500,21501,  
21502,21503,21508,21509,21600,21601,21602,21603,21604,21605,  
21606,21607,21608,21609,21619,21629,21689,21699,21700,21701,  
21702,21708,21709,21899,21909,21919,21990,21991,21999,22099,  
22100,22101,22102,22109,22119,22129,22189,22199,22209,22219,  
22280,22281,22289,22299,22309,22319,22329,22330,22331,22332,  
22338,22339,22380,22389,22399,22400,22401,22402,22403,22404,  
22408,22409,22500,22501,22502,22503,22504,22505,22506,22507,  
22508,22509,22510,22511,22518,22519,22520,22521,22522,22523,  
22524,22525,22528,22529,22530,22531,22539,22549,22559,22569,  
22599,22609,22619,22620,22621,22629,22639,22689,22699,22700,  
22701,22702,22703,22709,22899

---

**ICD10:** D10,D100,D101,D101A,D102,  
D103,D103A,D103B,D104,D104A,D105,D106,D107,D109,D11,  
D110,D117,D117A,D117B,D119,D12,D120,D120A,D121,D122,  
D123,D123A,D123B,D124,D125,D126,D126A,D126B,D126C,D126F,  
D127,D128,D129,D129A,D129B,D13,D130,D131,D132,D133,  
D133A,D134,D134A,D135,D136,D137,D137A,D137B,D139,D14,  
D140,D140A,D140B,D140C,D141,D142,D143,D143A,D143B,D144,  
D15,D150,D151,D152,D157,D159,D16,D160,D160A,D160C,  
D160D,D161,D161A,D161B,D162,D162A,D162B,D163,D163A,D163B,  
D163C,D164,D164A,D164C,D164D,D165,D165A,D166,D166B,D167,  
D167A,D167B,D167D,D167E,D167F,D168,D168B,D168D,D168E,D168F,  
D169,D169A,D169B,D17,D170,D170A,D170B,D170C,D170D,D170E,  
D170F,D171,D171A,D171B,D172,D172A,D172B,D173,D173A,D173B,  
D174,D175,D176,D177,D177A,D177B,D179,D18,D180,D180A,  
D180B,D180C,D180D,D180E,D180F,D181,D181A,D181B,D189,D19,  
D190,D191,D192,D192D,D193,D194,D195,D196,D197,D199,  
D20,D200,D201,D21,D210,D210A,D210B,D210C,D211,D211A,  
D211B,D212,D212A,D212B,D213,D214,D215,D216,D217,D217A,  
D219,D22,D220,D220D,D220E,D220G,D220P,D220Z,D221,D221A,  
D221B,D221D,D221G,D221N,D221P,D222,D222A,D222B,D222D,D222F,  
D222G,D222P,D223,D223A,D223D,D223E,D223F,D223G,D223H,D223K,  
D223L,D223N,D223P,D223Q,D223V,D223Z,D224,D224A,D224B,D224D,  
D224E,D224F,D224G,D224L,D224P,D224Q,D224V,D225,D225B,D225D,  
D225E,D225F,D225G,D225H,D225K,D225L,D225M,D225P,D225Q,D225V,  
D225Z,D226,D226B,D226D,D226E,D226F,D226G,D226N,D226P,D226V,  
D226Z,D227,D227A,D227B,D227D,D227E,D227F,D227G,D227H,D227P,  
D227V,D228,D228A,D228D,D228E,D228G,D228H,D228L,D228N,D228P,  
D228Q,D229,D229D,D229E,D229F,D229G,D229H,D229K,D229L,D229M,  
D229N,D229P,D229Q,D229V,D229Z,D23,D230,D2301,D2308,D230D,  
D230F,D230H,D230J,D230K,D230L,D230Q,D230T,D230U,D230X,D231,  
D2318,D231A,D231B,D231D,D231F,D231H,D231I,D231J,D231K,D231L,  
D231Q,D231T,D231X,D232,D2328,D232A,D232B,D232D,D232F,D232H,  
D232J,D232L,D232N,D232Q,D232R,D232X,D233,D2331,D2338,D233D,  
D233F,D233G,D233H,D233I,D233L,D233Q,D233R,D233T,D233X,D233Y,  
D233Z,D234,D2341,D2348,D234A,D234B,D234D,D234F,D234G,D234H,  
D234I,D234J,D234L,D234N,D234Q,D234R,D234T,D234X,D235,D2351,  
D2358,D235A,D235B,D235C,D235D,D235H,D235I,D235J,D235K,D235L,  
D235M,D235N,D235Q,D235R,D235T,D235X,D235Y,D236,D2361,D2368,  
D236B,D236D,D236E,D236H,D236I,D236J,D236K,D236L,D236N,D236R,  
D236X,D237,D2371,D2378,D237A,D237B,D237D,D237E,D237H,D237J,  
D237K,D237L,D237M,D237N,D237R,D237S,D237X,D237Y,D238,D2381,  
D2388,D238D,D238E,D238G,D238H,D238J,D238L,D238N,D238Q,D238R,

---

---

D238X,D238Y,D238Z,D239,D2391,D2392,D2398,D239A,D239D,D239E,  
D239G,D239H,D239I,D239J,D239K,D239L,D239M,D239N,D239Q,D239R,  
D239T,D239X,D239Z,D24,D249,D249A,D249B,D249C,D249D,D249E,  
D249F,D249G,D249W,D25,D250,D250A,D250B,D250C,D251,D252,  
D259,D26,D260,D261,D267,D269,D27,D270,D271,D272,  
D278,D279,D28,D280,D281,D282,D282A,D282C,D287,D289,  
D2891,D2898,D289H,D289M,D289N,D289Q,D289R,D289X,D29,D290,  
D291,D292,D293,D294,D297,D297A,D297C,D299,D2998,D299J,  
D299K,D299L,D299M,D299Q,D299T,D299X,D30,D300,D301,D302,  
D303,D304,D307,D309,D31,D310,D311,D312,D313,D314,  
D315,D315A,D315B,D316,D316A,D317,D319,D32,D320,D321,  
D329,D329A,D33,D330,D330A,D330B,D330C,D330D,D331,D331A,  
D331B,D331C,D331D,D332,D333,D333A,D333B,D334,D337,D339,  
D34,D349,D35,D350,D350A,D351,D352,D352A,D353,D354,  
D355,D356,D356B,D356C,D357,D358,D359,D36,D360,D361,  
D361A,D367,D369

---

**circulatory – all**

**ICD-8:** 39099,39109,39119,  
39129,39199,39209,39299,39300,39301,39308,39309,39400,39401,  
39402,39408,39409,39490,39491,39492,39498,39499,39500,39501,  
39502,39508,39509,39590,39591,39592,39598,39599,39600,39601,  
39602,39603,39604,39608,39609,39690,39691,39692,39693,39694,  
39698,39699,39700,39701,39709,39899,40009,40019,40029,40039,  
40099,40199,40299,40399,40499,41009,41099,41109,41199,41209,  
41299,41309,41399,41409,41499,42000,42001,42008,42009,42100,  
42101,42108,42109,42199,42299,42300,42301,42302,42308,42309,  
42400,42401,42402,42408,42409,42410,42411,42412,42418,42419,  
42490,42491,42492,42499,42599,42600,42601,42602,42608,42609,  
42709,42710,42711,42719,42720,42721,42722,42723,42724,42725,  
42726,42727,42728,42729,42790,42791,42792,42793,42794,42795,  
42796,42797,42799,42899,42900,42908,42909,43000,43001,43008,  
43009,43090,43091,43098,43099,43100,43101,43108,43109,43190,  
43191,43198,43199,43200,43201,43202,43208,43209,43290,43291,  
43292,43298,43299,43309,43399,43409,43499,43509,43599,43600,  
43601,43609,43690,43699,43700,43701,43708,43709,43790,43791,  
43798,43799,43809,43899,44009,44019,44020,44021,44028,44029,  
44030,44039,44099,44109,44110,44111,44119,44120,44121,44129,  
44199,44299,44300,44301,44302,44308,44309,44319,44329,44380,  
44381,44382,44389,44399,44400,44408,44409,44419,44420,44421,  
44428,44429,44439,44440,44441,44442,44443,44444,44448,44449,  
44490,44499,44609,44619,44629,44630,44631,44639,44649,44690,  
44691,44692,44699,44799,44801,44802,44808,44809,044990,

---

**ICD10:** I00,I009,I009A,I009B,I01,I010,I011,I012,I018,I018A,  
I019,I02,I020,I020A,I029,I05,I050,I051,I052,I058,  
I059,I06,I060,I061,I062,I068,I069,I07,I070,I071,  
I072,I078,I079,I08,I080,I080A,I081,I081A,I082,I082A,  
I083,I088,I089,I09,I090,I091,I091A,I091B,I092,I092B,  
I092C,I098,I098A,I098B,I098E,I099,I10,I109,I11,I110,  
I119,I12,I120,I129,I13,I130,I131,I132,I139,I15,  
I150,I151,I152,I158,I159,I20,I200,I200A,I200B,I200C,  
I201,I201A,I201B,I208,I208A,I208B,I208D,I209,I21,I210,  
I210A,I210B,I211,I211A,I211B,I212,I212A,I212B,I212C,I212E,  
I212G,I212H,I213,I214,I219,I22,I220,I220A,I220C,I221,  
I221A,I221B,I228,I228B,I228C,I228F,I228G,I229,I23,I230,  
I231,I232,I233,I234,I235,I236,I236A,I236B,I238,I238A,

---

---

I24,I240,I240A,I241,I241A,I248,I248A,I249,I25,I250,  
I251,I251A,I251B,I251C,I252,I252A,I252B,I252C,I253,I254,  
I255,I256,I256A,I258,I259,I26,I260,I260A,I269,I269A,  
I27,I270,I271,I272,I278,I279,I279A,I28,I280,I281,  
I288,I288A,I288B,I289,I30,I300,I301,I301A,I301B,I301C,  
I301E,I308,I309,I31,I310,I310B,I311,I311A,I311B,I312,  
I313,I313A,I318,I318B,I319,I319A,I33,I330,I330A,I330B,  
I330C,I330D,I330E,I330F,I339,I34,I340,I341,I342,I348,  
I348A,I349,I35,I350,I351,I352,I358,I358A,I359,I36,  
I360,I361,I362,I368,I368A,I369,I37,I370,I371,I372,  
I378,I379,I38,I389,I40,I400,I400A,I400B,I401,I408,  
I409,I42,I420,I421,I421A,I422,I423,I423B,I424,I424A,  
I425,I428,I428A,I428B,I429,I44,I440,I441,I441A,I441B,  
I441C,I441D,I441E,I442,I442A,I443,I443A,I444,I445,I446,  
I446A,I446B,I447,I45,I450,I451,I451A,I452,I453,I454,  
I455,I455A,I455B,I455C,I455G,I455H,I455K,I455L,I456,I456A,  
I456AA,I456B,I456C,I456D,I456DA,I456DB,I456E,I458,I458M,I459,  
I459A,I46,I460,I461,I469,I47,I470,I470A,I470B,I470C,  
I470D,I470H,I470HA,I470HB,I471,I471A,I471B,I471C,I471E,I471EA,  
I471EB,I471F,I471FA,I471G,I471H,I471J,I471L,I471LA,I471M,I471N,  
I471P,I471PA,I471PB,I471R,I471RA,I471RB,I471RC,I471X,I472,I472A,  
I472B,I472D,I472E,I472EA,I472F,I472FA,I472H,I472L,I472LA,I472LB,  
I472LC,I472M,I472N,I472NA,I478,I478A,I479,I479A,I48,I489,  
I489A,I489AA,I489AB,I489AC,I489AD,I489AE,I489B,I489BA,I489BB,I489BC,  
I489BD,I49,I490,I490A,I490B,I491,I491A,I491B,I491C,I491D,  
I491E,I492,I493,I493A,I493B,I493C,I494,I494A,I495,I495A,  
I495B,I498,I498A,I498B,I498C,I498D,I498E,I499,I499A,I50,  
I500,I500A,I501,I501A,I501B,I501C,I502,I503,I508,I508A,  
I509,I509A,I509B,I51,I510,I510A,I510B,I511,I511A,I512,  
I513,I513A,I513B,I513C,I514,I514A,I515,I516,I517,I517A,  
I517B,I517C,I518,I518A,I519,I60,I600,I601,I602,I603,  
I604,I605,I606,I606A,I606B,I606C,I606D,I607,I607A,I608,  
I609,I61,I610,I610A,I611,I611A,I611B,I612,I613,I614,  
I615,I616,I618,I619,I62,I620,I621,I629,I63,I630,  
I631,I632,I633,I634,I634A,I635,I636,I638,I639,I64,  
I649,I65,I650,I650A,I650B,I651,I651A,I651B,I652,I652A,  
I652B,I653,I653B,I653C,I653D,I658,I659,I66,I660,I660A,  
I660B,I661,I662,I662A,I663,I664,I668,I668A,I669,I67,  
I670,I671,I671A,I672,I672A,I673,I673A,I674,I676,I676A,  
I677,I678,I678A,I678B,I679,I69,I690,I691,I692,I693,  
I694,I698,I70,I700,I701,I702,I702A,I702B,I708,I709,  
I71,I710,I710A,I710B,I711,I712,I713,I714,I715,I716,  
I718,I719,I719A,I719B,I72,I720,I721,I722,I723,I724,  
I728,I729,I73,I730,I731,I738,I738A,I738B,I738C,I738D,  
I739,I739A,I739B,I739C,I74,I740,I740A,I740B,I740C,I740D,  
I741,I741A,I741B,I742,I742A,I742B,I743,I743A,I743B,I744,  
I744A,I744B,I744C,I744D,I744E,I745,I745A,I745B,I748,I749,  
I77,I770,I770A,I771,I772,I772A,I772B,I773,I774,I775,  
I776,I776A,I778,I778A,I779,I78,I781,I781A,I781B,I781C,  
I781D,I788,I788A,I788B,I788C,I788D,I789

---

nervous – all

**ICD-8:** 32009,32019,  
32080,32089,32090,32091,32092,32093,32099,32199,32200,32201,  
32202,32203,32204,32205,32208,32209,32300,32301,32302,32303,  
32308,32309,32400,32401,32408,32409,34000,34001,34008,34009,

---

---

34100,34101,34109,34299,34600,34601,34608,34609,34790,34791,  
34792,34793,34794,34795,34796,34799,35799,35800,35801,35808,  
35809

---

**ICD10:** G00,G000,G001,G002,G003,G008,G008A,G008B,G009,G009A,  
G03,G030,G031,G032,G038,G039,G04,G040,G040A,G041,  
G042,G042A,G048,G048A,G048B,G048C,G049,G049A,G049B,G049C,  
G06,G060,G060B,G060C,G060D,G060E,G060F,G060G,G060I,G060J,  
G060M,G061,G061A,G061B,G061C,G061E,G062,G062A,G062B,G062C,  
G08,G089,G089A,G089B,G089L,G09,G099,G20,G209,G209A,  
G21,G210,G211,G212,G213,G218,G218A,G219,G23,G231,  
G231A,G232,G238,G239,G30,G300,G301,G308,G309,G31,  
G310,G310A,G310B,G311,G318,G318B,G318D,G318E,G319,G35,  
G359,G359A,G359B,G359C,G36,G360,G360A,G361,G368,G369,  
G37,G370,G370A,G371,G372,G373,G373A,G374,G375,G378,  
G379,G54,G540,G540A,G540B,G540C,G541,G542,G543,G544,  
G545,G545A,G545B,G546,G547,G547A,G548,G549,G56,G560,  
G561,G562,G562A,G563,G564,G568,G568A,G569,G57,G570,  
G571,G571A,G572,G573,G574,G575,G576,G576A,G578,G578A,  
G579,G58,G580,G587,G588,G589,G59,G590,G598,G61,  
G610,G610A,G611,G618,G619,G64,G649,G649A,G90,G900,  
G900A,G902,G903,G903A,G903B,G908,G909,G93,G930,G930A,  
G930B,G931,G932,G933,G933A,G934,G935,G935A,G935B,G935C,  
G936,G937,G939,G95,G950,G950A,G950B,G951,G951A,G951B,  
G951D,G951G,G952,G952A,G958,G958A,G958B,G958C,G959,G96,  
G960,G960A,G960B,G961,G968,G969,G98,G989

---

eye/adnexa – all

**ICD-8:** 36000,36001,36002,  
36003,36004,36005,36008,36009,36100,36101,36102,36103,36108,  
36109,36200,36201,36202,36208,36209,36300,36301,36302,36303,  
36308,36309,36390,36391,36392,36393,36394,36395,36398,36399,  
36400,36401,36402,36403,36404,36408,36409,36500,36501,36502,  
36503,36508,36509,36600,36601,36602,36603,36604,36609,36700,  
36701,36702,36708,36709,36800,36801,36802,36803,36804,36805,  
36806,36808,36809,36900,36901,36902,36903,36904,36905,36908,  
36909,37000,37001,37002,37003,37004,37008,37009,37100,37102,  
37108,37109,37299,37300,37301,37302,37303,37304,37305,37306,  
37308,37309,37401,37402,37403,37404,37405,37406,37407,37408,  
37409,37500,37501,37502,37503,37504,37508,37509,37510,37511,  
37512,37513,37514,37515,37516,37518,37519,37520,37521,37528,  
37529,37590,37599,37600,37601,37602,37603,37608,37609,37700,  
37701,37702,37703,37704,37705,37706,37707,37708,37709,37710,  
37711,37718,37719,37729,37739,37790,37791,37792,37793,37799,  
37809,37810,37813,37814,37815,37820,37821,37822,37823,37825,  
37830,37831,37832,37840,37850,37851,37852,37860,37861,37862,  
37863,37864,37865,37866,37867,37868,37869,37870,37871,37872,  
37873,37874,37875,37876,37877,37878,37879,37880,37881,37882,  
37883,37884,37885,37886,37887,37888,37889,37899,37909,37919,  
37929,37939,38000,38001,38002,38003,38008,38009,38100,38101,  
38102,38108,38109,38119,38199,38209,38219,38299,38309,38319,  
38399,38400,38401,38402,38409,38599,38699,38709,38719,38790,  
38791,38792,38793,38794,38795,38796,38797,38799,38800,38809,  
38909,38919,38929,38999

---

**ICD10:** H00,H000,H000A,H000B,H000C,H000D,H001,H01,H010,H011,  
H011A,H011B,H011C,H011D,H011E,H018,H019,H02,H020,H020A,

---



---

H020B,H021,H022,H023,H024,H025,H025A,H025B,H025C,H025D,  
H026,H027,H027B,H027C,H028,H028A,H028B,H028C,H029,H04,  
H040,H041,H041B,H041C,H041D,H041E,H041F,H042,H043,H043A,  
H043B,H043C,H043D,H043F,H044,H044A,H044B,H044C,H045,H045A,  
H045B,H045C,H045D,H045E,H045F,H046,H046A,H048,H049,H05,  
H050,H050A,H050B,H050D,H050E,H051,H051A,H052,H052A,H052B,  
H053,H053A,H053B,H053C,H053D,H054,H055,H055A,H055B,H058,  
H058A,H058B,H059,H10,H100,H101,H101A,H102,H103,H104,  
H104A,H105,H108,H109,H11,H110,H111,H111B,H111C,H111D,  
H111E,H112,H112A,H114,H114A,H114B,H114C,H114D,H118,H118A,  
H119,H13,H130,H131,H131A,H131B,H131C,H131D,H131F,H131I,  
H131J,H131M,H131N,H132,H133,H133A,H138,H15,H150,H151,  
H158,H158A,H158B,H159,H16,H160,H160A,H160B,H160C,H160D,  
H160E,H160F,H160G,H160H,H161,H161A,H161B,H161C,H161D,H161E,  
H161F,H161G,H161H,H162,H162A,H162B,H163,H164,H168,H169,  
H17,H170,H171,H178,H178A,H179,H18,H180,H180A,H180B,  
H180C,H180D,H180E,H181,H182,H183,H183B,H184,H184A,H184B,  
H186,H187,H187A,H187B,H187C,H187D,H188,H188A,H188B,H188C,  
H189,H20,H200,H200A,H200B,H200C,H200D,H200E,H200F,H200G,  
H200H,H200I,H200J,H200K,H201,H202,H202A,H208,H209,H21,  
H210,H211,H211A,H212,H212A,H212B,H212D,H212E,H212F,H212H,  
H212I,H213,H213B,H213C,H213D,H213E,H213H,H214,H214A,H214B,  
H215,H215A,H215B,H215D,H215E,H215F,H218,H219,H25,H250,  
H250A,H250B,H250C,H250D,H250E,H250F,H250G,H251,H251A,H251B,  
H252,H252A,H258,H259,H26,H262,H262A,H262B,H264,H264A,  
H268,H269,H27,H270,H271,H271A,H271B,H271C,H278,H279,  
H30,H300,H300A,H300B,H301,H301A,H301B,H302,H308,H308A,  
H309,H31,H310,H310A,H310B,H310C,H311,H311A,H311B,H313,  
H313A,H313B,H313C,H314,H314A,H318,H319,H33,H330,H330A,  
H331,H331A,H331B,H331C,H331D,H331E,H332,H332A,H332B,H333,  
H333A,H333B,H334,H334A,H335,H34,H340,H340A,H341,H341A,  
H341B,H342,H342A,H342B,H342C,H348,H348A,H348B,H348C,H348D,  
H348E,H348F,H349,H35,H350,H350A,H350B,H350C,H350D,H350E,  
H350F,H350G,H350H,H350I,H350J,H350K,H351,H351A,H352,H352A,  
H353,H353A,H353B,H353C,H353D,H353E,H353F,H353G,H353H,H353J,  
H353K,H353L,H354,H354A,H354C,H354D,H356,H357,H357A,H357B,  
H358,H359,H40,H400,H401,H401A,H401B,H401C,H401D,H401E,  
H401F,H402,H402A,H402B,H402C,H404,H405,H408,H409,H43,  
H430,H431,H432,H433,H433A,H438,H438A,H438B,H438C,H439,  
H44,H440,H441,H441A,H441B,H441D,H442,H443,H444,H445,  
H445B,H445C,H446,H446B,H446C,H446E,H446F,H447,H447A,H447B,  
H447C,H447D,H447E,H447F,H448,H448A,H448B,H448C,H449,H46,  
H469,H469A,H469B,H469C,H47,H470,H470A,H470B,H470C,H471,  
H471A,H472,H472A,H473,H473A,H473B,H474,H475,H475A,H475C,  
H476,H477,H49,H490,H491,H492,H493,H494,H498,H498A,  
H498B,H499,H50,H500,H500A,H500B,H501,H501A,H501B,H502,  
H503,H503A,H503B,H504,H504A,H504B,H504C,H504D,H504E,H504F,  
H504G,H505,H505A,H505B,H505C,H506,H506A,H506B,H508,H508A,  
H509,H51,H510,H511,H512,H518,H519,H52,H520,H521,  
H522,H523,H523A,H523B,H524,H525,H525A,H525B,H526,H527,  
H53,H530,H530A,H530B,H530C,H531,H531A,H531C,H531D,H531E,  
H531F,H531G,H531H,H532,H533,H533A,H533B,H533C,H534,H534A,  
H534B,H534C,H534D,H534E,H534G,H534H,H534I,H535,H535B,H535C,  
H535D,H535E,H536,H538,H539,H54,H540,H541,H542,H543,

---

---

H544,H545,H546,H547,H55,H559,H559A,H559B,H559C,H559D,  
H559X,H57,H570,H570A,H571,H578,H579

---

mental – all

**ICD-8:** 29009,29010,  
29011,29018,29019,29209,29219,29229,29239,29299,29309,29319,  
29329,29339,29349,29399,29409,29419,29429,29489,29499,29509,  
29519,29529,29539,29559,29569,29589,29599,29709,29719,29799,  
29839,29689,30183,29609,29619,29629,29639,29699,29809,29819,  
30019,30049,30119,29829,30009,30029,30039,30059,30069,30079,  
30089,30099,30509,30519,30529,30539,30549,30559,30560,30568,  
30569,30109,30129,30139,30149,30159,30169,30179,30180,30181,  
30182,30184,30189,30199

---

**ICD10:** F00,F000,F0000,F0001,F0002,F0003,F0004,F001,F0010,F0011,  
F0012,F0013,F0014,F002,F0020,F0021,F0022,F0023,F0024,F009,  
F0090,F0091,F0092,F0093,F0094,F01,F010,F0100,F0101,F0102,  
F0103,F0104,F011,F0110,F0111,F0112,F0113,F0114,F012,F0120,  
F0121,F0122,F0123,F0124,F013,F0130,F0131,F0132,F0133,F0134,  
F018,F0180,F0181,F0182,F0183,F0184,F019,F0190,F0191,F0192,  
F0193,F0194,F03,F039,F0390,F0391,F0392,F0393,F0394,F04,  
F049,F05,F050,F051,F058,F059,F09,F099,F20,F200,  
F2000,F2001,F2002,F2003,F2004,F2005,F2006,F2007,F2008,F2009,  
F201,F2010,F2011,F2012,F2013,F2014,F2015,F2018,F2019,F202,  
F2020,F2021,F2022,F2023,F2024,F2025,F2028,F2029,F203,F2030,  
F2031,F2032,F2033,F2034,F2035,F2038,F2039,F204,F2040,F2044,  
F205,F2050,F2051,F2052,F2053,F2054,F2055,F2058,F2059,F206,  
F2060,F2061,F2062,F2063,F2064,F2065,F2069,F208,F2080,F2081,  
F2084,F2088,F209,F2090,F2091,F2092,F2093,F2094,F2095,F2098,  
F2099,F21,F210,F2100,F219,F22,F220,F2200,F222,F228,  
F229,F25,F250,F2500,F2501,F251,F2510,F2511,F252,F2520,  
F2521,F258,F2580,F2581,F259,F2590,F2591,F28,F280,F289,  
F29,F299,F30,F300,F301,F302,F3020,F3021,F308,F309,  
F31,F310,F311,F312,F3120,F3121,F313,F3130,F3131,F314,  
F315,F3150,F3151,F316,F317,F318,F319,F32,F320,F3200,  
F3201,F321,F3210,F3211,F322,F323,F3230,F3231,F328,F329,  
F329A,F33,F330,F3300,F3301,F331,F3310,F3311,F332,F3321,  
F333,F3330,F3331,F334,F338,F339,F34,F340,F3400,F3401,  
F341,F3410,F3411,F348,F349,F38,F380,F3800,F381,F3810,  
F388,F39,F399,F40,F400,F4000,F4001,F401,F402,F402A,  
F408,F409,F41,F410,F4100,F4101,F411,F412,F413,F418,  
F419,F42,F420,F421,F422,F4220,F4222,F428,F429,F43,  
F430,F4300,F4301,F4302,F431,F432,F4320,F4321,F4322,F4323,  
F4324,F4325,F4328,F433,F4330,F438,F439,F44,F440,F441,  
F442,F443,F444,F445,F446,F447,F448,F4480,F4481,F4482,  
F4488,F449,F45,F450,F451,F452,F452A,F453,F4530,F4531,  
F4532,F4533,F4534,F4538,F454,F458,F459,F48,F480,F481,  
F488,F489,F60,F600,F601,F602,F6020,F603,F6030,F6031,  
F604,F605,F606,F607,F608,F609,F6090,F61,F610,F611,  
F619,F68,F680,F681,F688,F69,F690,F699

---

---

**B. COVARIATE EFFECTS [PRE-EXISTING CONDITIONS]**

---

|                                                                                                                                                                                                    |               |                                                                                                                                                                                                                                                                                    |
|----------------------------------------------------------------------------------------------------------------------------------------------------------------------------------------------------|---------------|------------------------------------------------------------------------------------------------------------------------------------------------------------------------------------------------------------------------------------------------------------------------------------|
| <b>pre-existing maternal hypertension</b> – essential (primary) hypertension, hypertensive heart disease, hypertensive renal disease, hypertensive heart and renal disease, secondary hypertension | <b>ICD-8:</b> | 40009, 40019, 40029, 40039, 40099, 40199, 40299, 40399, 40499                                                                                                                                                                                                                      |
|                                                                                                                                                                                                    | <b>ICD10:</b> | O10, O100, O100A-0C, O101, O101A-1C, O102, O102A-2C, O103, O103A, O104, O104A-4C, O109, O109A-9C, O11, O119, O119A-9C, I10, I109, I11, I110, I119, I12, I120, I129, I13, I130-2, I139, I15, I150-2, I158-9                                                                         |
| <b>pre-existing maternal diabetes</b> – type I (insulin dependent) and type II (non-insulin dependent), malnutrition-related, other, unspecified                                                   | <b>ICD-8:</b> | 24900-09, 25000-09                                                                                                                                                                                                                                                                 |
|                                                                                                                                                                                                    | <b>ICD10:</b> | E10, E100, E100A-0F, E101-5, E105A-5D, E106-9, E109A, E11, E110, E110A-0E, E111-5, E115A-5D, E116-9, E119A, E12, E120, E120A-0E, E121-5, E125A-5C, E126-9, E13, E130-9, E14, E140, E140A-0D, E141-5, E145A-5D, E146-9, O240, O240A-0C, O241, O241A-1C, O242, O242A, O243, O243A-3B |

---

**B. COVARIATE EFFECTS [PREGNANCY-INDUCED]**

---

|                                                                                                                                       |               |                                                                                                                                     |
|---------------------------------------------------------------------------------------------------------------------------------------|---------------|-------------------------------------------------------------------------------------------------------------------------------------|
| <b>maternal bleeding</b> – haemorrhage in early pregnancy, placenta praevia, premature separation of placenta, antepartum haemorrhage | <b>ICD-8:</b> | 63209, 63219, 63229, 63239, 63249, 63299, 65100-22, 65124-43, 65145-60, 65163, 65165-66, 65168-80, 65182, 65185-87, 65189-99        |
|                                                                                                                                       | <b>ICD10:</b> | O20, O200, O208, O208A, O208B, O209, O44, O440-3, O449, O45, O450, O450D, O451, O451B, O452-3, O458-9, O46, O460, O468, O468A, O469 |
| <b>fetal oxygen deprivation</b> – intrauterine hypoxia, birth asphyxia                                                                | <b>ICD-8:</b> | 77639, 77649, 77690-93, 77698-99                                                                                                    |
|                                                                                                                                       | <b>ICD10:</b> | P20, P200, P200A-0E, P201, P201A-1B, P201D-1E, P209, P21, P210, P210A-0D, P211, P211A-1D, P219                                      |
| <b>pregnancy oedema</b>                                                                                                               | <b>ICD-8:</b> | 63702                                                                                                                               |
|                                                                                                                                       | <b>ICD10:</b> | O12, O120-2                                                                                                                         |

---

---

**C. CONDITIONS SURGERIES TREAT**

---

|                                |                                                                                                                                                                                                                                                                                                                                                                                            |
|--------------------------------|--------------------------------------------------------------------------------------------------------------------------------------------------------------------------------------------------------------------------------------------------------------------------------------------------------------------------------------------------------------------------------------------|
| <b>abnormal breathing</b>      | <b>ICD-8:</b><br><b>ICD10:</b> R065,R065A                                                                                                                                                                                                                                                                                                                                                  |
| <b>sleep disorders</b>         | <b>ICD-8:</b> 30649,78069<br><b>ICD10:</b> G47,G470,G4700,G4703,G471,G4710,G4711,G4712,G4713,G4715,<br>G472,G4720,G4721,G4722,G4723,G4726,G473,G4730,G4731,G4732,<br>G4734,G4735,G4735A,G4735C,G4735E,G4736,G4739,G474,G4741,G4742,<br>G4743,G4744,G474A,G474B,G475,G4750,G4751,G4752,G4753,G4756,<br>G4757,G475W,G476,G4760,G4761,G4762,G4763,G4764,G4765,G4766,<br>G478,G478A,G479,G479A |
| <b>obstructive sleep apnea</b> | <b>ICD-8:</b><br><b>ICD10:</b> G473,G4730,G4731,G4732,G4734,G4735,G4735A,G4735C,G4735E,G4736,<br>G4739                                                                                                                                                                                                                                                                                     |
| <b>tonsillitis</b>             | <b>ICD-8:</b> 46300,46301,46302,46308,46309<br><b>ICD10:</b> J03,J030,J038,J039,J039A,J039B,J039C,J039D,J039E,J039F                                                                                                                                                                                                                                                                        |
| <b>chronic tonsillitis</b>     | <b>ICD-8:</b> 50000,50001,50002,50008,50009,<br><b>ICD10:</b> J35,J350,J351,J351A,J351B,J352,J353,J358,J358A,J358C,<br>J359                                                                                                                                                                                                                                                                |
| <b>sinusitis</b>               | <b>ICD-8:</b> 46100,46101,46102,46103,46104,46108,46109,<br><b>ICD10:</b> J01,J010,J010A,J010B,J011,J011A,J011B,J012,J012A,J012B,<br>J013,J013B,J014,J014A,J018,J019                                                                                                                                                                                                                       |
| <b>chronic sinusitis</b>       | <b>ICD-8:</b> 50300,50301,50302,50303,50304,50305,50306,50307,50308,50309<br><b>ICD10:</b> J32,J320,J321,J322,J323,J324,J328,J329                                                                                                                                                                                                                                                          |
| <b>otitis media</b>            | <b>ICD-8:</b> 38100,38101,38102,38108,38109,38119,38199,38209,38219,38299<br><b>ICD10:</b> H650,H650A,H650B,H651,H651A,H651B,H651C,H651D,H651E,H651F<br>H651G,H652,H652A,H653,H653A,H653B,H654,H654A,H654B,H654C<br>H659,H66,H660,H660A,H661,H661A,H662,H663,H664,H669                                                                                                                     |

---

---

**D. NON-IMMUNE DISEASES**

---

|                            |                                                                                                                                                                                                                                                                                                                                                                                                                                                                                                                                                                                                                                                                                                                                                                                                                                                                          |
|----------------------------|--------------------------------------------------------------------------------------------------------------------------------------------------------------------------------------------------------------------------------------------------------------------------------------------------------------------------------------------------------------------------------------------------------------------------------------------------------------------------------------------------------------------------------------------------------------------------------------------------------------------------------------------------------------------------------------------------------------------------------------------------------------------------------------------------------------------------------------------------------------------------|
| <b>osteoarthritis</b>      | <b>ICD-8:</b> 71300,71301,71302,71303,71304,71305,71306,71308,71309,71310,71311,71312,71313,71314,71315,71318,71319                                                                                                                                                                                                                                                                                                                                                                                                                                                                                                                                                                                                                                                                                                                                                      |
|                            | <b>ICD10:</b> M15,M150,M151,M152,M153,M153A,M154,M158,M159,M16,M160,M161,M161A,M161B,M162,M163,M163A,M163B,M164,M165,M165A,M165B,M166,M167,M167A,M167B,M169,M17,M170,M171,M171A,M171B,M172,M173,M173A,M173B,M174,M175,M175A,M175B,M179,M18,M180,M181,M181A,M181B,M182,M183,M184,M185,M185A,M185B,M189,M19,M190,M190A,M191,M191A,M192,M192A,M198,M198A,M199,M47,M470,M470A,M470B,M471,M471A,M471B,M471C,M472,M472A,M472B,M478,M478A,M478B,M478C,M478D,M478E,M479                                                                                                                                                                                                                                                                                                                                                                                                          |
| <b>cardiac arrhythmias</b> | <b>ICD-8:</b> 427.5,42790,42791,42792,427.4,42793,42794,427.9,42799,78229                                                                                                                                                                                                                                                                                                                                                                                                                                                                                                                                                                                                                                                                                                                                                                                                |
|                            | <b>ICD10:</b> I47,I47,I470,I470A,I470B,I470C,I470D,I470H,I470HA,I470HB,I471,I471A,I471B,I471C,I471E,I471EA,I471EB,I471F,I471FA,I471G,I471H,I471J,I471L,I471LA,I471M,I471N,I471P,I471PA,I471PB,I471R,I471RA,I471RB,I471RC,I471X,I472,I472A,I472B,I472D,I472E,I472EA,I472F,I472FA,I472H,I472L,I472LA,I472LB,I472LC,I472M,I472N,I472NA,I478,I478A,I479,I479A,I48,I48,I489,I489A,I489AA,I489AB,I489AC,I489AD,I489AE,I489B,I489BA,I489BB,I489BC,I489BD,I49,I49,I490,I490A,I490B,I491,I491A,I491B,I491C,I491D,I491E,I492,I493,I493A,I493B,I493C,I494,I494A,I495,I495A,I495B,I498,I498A,I498B,I498C,I498D,I498E,I499,I499A,R000,R001                                                                                                                                                                                                                                            |
| <b>heart failure</b>       | <b>ICD-8:</b> 747090,39490,39491,39492,39498,39499,39590,39591,39592,39598,39599,39700,74609,74619,74629,74639,74640,74641,74649,74659,74660,74661,74662,74663,74669,74679,74689,74699,74709,74719,74729,74739,74749,74759,74769,74789,74799                                                                                                                                                                                                                                                                                                                                                                                                                                                                                                                                                                                                                             |
|                            | <b>ICD10:</b> I061,I051,Q250,Q210,I34,I340,I341,I342,I348,I348A,I349,I35,I350,I351,I352,I358,I358A,I359,I36,I360,I361,I362,I368,I368A,I369,I37,I370,I371,I372,I378,I379,Q20,Q200,Q201,Q202,Q203,Q203A,Q204,Q205,Q205B,Q206,Q208,Q209,Q21,Q211,Q211A,Q211B,Q212,Q213,Q213A,Q214,Q218,Q218A,Q218B,Q218C,Q219,Q22,Q220,Q221,Q222,Q223,Q224,Q225,Q226,Q228,Q229,Q23,Q230,Q230A,Q231,Q231A,Q232,Q232A,Q233,Q234,Q238,Q238A,Q238B,Q239,Q24,Q240,Q241,Q242,Q243,Q244,Q245,Q246,Q248,Q248A,Q248D,Q248G,Q248H,Q248I,Q248K,Q249,Q25,Q251,Q251A,Q252,Q253,Q253A,Q254,Q254B,Q254C,Q254E,Q254G,Q254H,Q254I,Q255,Q256,Q257,Q257C,Q257F,Q257G,Q258,Q259,Q26,Q260,Q261,Q262,Q263,Q264,Q265,Q266,Q268,Q268A,Q268B,Q269,Q27,Q270,Q270A,Q270B,Q271,Q272,Q273,Q274,Q278,Q278A,Q278B,Q278C,Q278E,Q278H,Q278J,Q278L,Q279,Q28,Q280,Q281,Q282,Q283,Q283A,Q283B,Q283C,Q283D,Q283E,Q288,Q288A,Q289 |
| <b>acid-peptic disease</b> | <b>ICD-8:</b> 53600,53608,53609,53619,53690,53691,53692,53693,53699                                                                                                                                                                                                                                                                                                                                                                                                                                                                                                                                                                                                                                                                                                                                                                                                      |
|                            | <b>ICD10:</b> K30,K309                                                                                                                                                                                                                                                                                                                                                                                                                                                                                                                                                                                                                                                                                                                                                                                                                                                   |
| <b>alcoholic hepatitis</b> | <b>ICD-8:</b> 57109                                                                                                                                                                                                                                                                                                                                                                                                                                                                                                                                                                                                                                                                                                                                                                                                                                                      |
|                            | <b>ICD10:</b> DK701,DK703                                                                                                                                                                                                                                                                                                                                                                                                                                                                                                                                                                                                                                                                                                                                                                                                                                                |

---

**Table S3. Relative risk (RR) for non-immune diseases up to age 30 depending on whether any of the three surgeries occurred between birth to 9 years of age.**

|                     | adenoidectomy    | tonsillectomy   | adenotonsillectomy |
|---------------------|------------------|-----------------|--------------------|
| Disease             | RR               | RR              | RR                 |
| osteoarthritis      | 1.04(0.85-1.29)  | 1.03(0.75-1.41) | 0.87(0.71-1.07)    |
| cardiac arrhythmias | 0.99(0.82-1.21)  | 0.99(0.75-1.31) | 1.17(0.99-1.37)    |
| heart failure       | 1.24(0.95-1.61)  | 1.28(0.92-1.78) | 1.15(0.93-1.42)    |
| acid-peptic disease | 1.17(1.01-1.36)  | 1.36(1.10-1.68) | 1.24(1.08-1.41)    |
| alcoholic hepatitis | 1.92(0.23-15.84) | -               | 5.78(1.21-27.59)   |

*Footnotes:*

- RR exclusion: Missing relative risks (RR) occur when the exponentiated coefficient for the Cox regression was infinite or there was insufficient power for hypothesis testing (see methods)
- RR p-values: None of the relative risks above were significant after Bonferroni correction for 14 analyses (i.e.  $\alpha=0.05/14=0.00357$ )

Table S4. Accompanying values for Fig. 1 including relative risks (RR), absolute risk difference (ARD), number needed to treat (NNT(B/H) or benefit/harm)

| Disease                                 | adenoidectomy   |       |          |          | tonsillectomy   |       |          |          | adenotonsillectomy |       |         |          | CR    |
|-----------------------------------------|-----------------|-------|----------|----------|-----------------|-------|----------|----------|--------------------|-------|---------|----------|-------|
|                                         | RR              | ER    | ARD      | NNT(B/H) | RR              | ER    | ARD      | NNT(B/H) | RR                 | ER    | ARD     | NNT(B/H) |       |
| <b>infectious/parasitic all</b>         | 1.27(1.19-1.36) | 15.39 | +3.32 %  | 30 (H)   | 1.22(1.11-1.35) | 14.84 | +2.78 %  | 36 (H)   | 1.17(1.10-1.25)    | 14.21 | +2.14 % | 47 (H)   | 12.07 |
| <b>all</b>                              | 1.37(1.25-1.51) | 3.84  | +1.06 %  | 94 (H)   | 1.35(1.19-1.54) | 3.77  | +0.99 %  | 101 (H)  | 1.20(1.10-1.31)    | 3.35  | +0.57 % | 176 (H)  | 2.78  |
| <b>rhinitis</b>                         | 1.61(1.42-1.82) | 1.36  | +0.52 %  | 193 (H)  | 1.53(1.29-1.82) | 1.29  | +0.45 %  | 220 (H)  | 1.24(1.10-1.40)    | 1.05  | +0.21 % | 479 (H)  | 0.84  |
| <b>allergic conjunctivitis</b>          | 1.75(1.35-2.26) | 0.37  | +0.16 %  | 624 (H)  | 1.50(1.03-2.18) | 0.32  | +0.11 %  | 937 (H)  | 1.36(1.07-1.73)    | 0.29  | +0.08 % | 1297 (H) | 0.21  |
| <b>eczema/dermatitis</b>                | 1.29(1.07-1.56) | 1.80  | +0.42 %  | 241 (H)  | -               | -     | -        | -        | 1.16(0.98-1.38)    | -     | -       | -        | 1.38  |
| <b>urticaria/angiodema</b>              | 1.22(1.01-1.46) | 0.83  | +0.15 %  | 656 (H)  | 1.46(1.15-1.86) | 1.00  | +0.32 %  | 314 (H)  | 1.18(0.99-1.39)    | -     | -       | -        | 0.68  |
| <b>skin all</b>                         | 1.23(1.17-1.30) | 7.74  | +1.49 %  | 67 (H)   | 1.39(1.29-1.49) | 8.70  | +2.45 %  | 41 (H)   | 1.28(1.22-1.34)    | 8.02  | +1.77 % | 56 (H)   | 6.25  |
| <b>autoimmune all</b>                   | 1.19(1.09-1.29) | 3.71  | +0.60 %  | 166 (H)  | 1.15(1.02-1.29) | 3.59  | +0.47 %  | 211 (H)  | 1.17(1.09-1.26)    | 3.66  | +0.55 % | 182 (H)  | 3.11  |
| <b>all</b>                              | 1.48(1.13-1.95) | 30.06 | +9.87 %  | 10 (H)   | -               | -     | -        | -        | -                  | -     | -       | -        | 20.19 |
| <b>upper</b>                            | 1.99(1.51-2.63) | 21.54 | +10.77 % | 9 (H)    | 2.72(1.54-4.80) | 29.38 | +18.61 % | 5 (H)    | -                  | -     | -       | -        | 10.77 |
| <b>lower</b>                            | 1.61(1.42-1.84) | 13.38 | +5.12 %  | 20 (H)   | 1.24(1.01-1.53) | 10.30 | +2.03 %  | 49 (H)   | 1.38(1.21-1.56)    | 11.41 | +3.15 % | 32 (H)   | 8.26  |
| <b>respiratory chronic lower asthma</b> | 1.44(1.33-1.56) | 8.80  | +2.72 %  | 37 (H)   | 1.39(1.24-1.55) | 8.47  | +2.39 %  | 42 (H)   | 1.33(1.24-1.43)    | 8.12  | +2.04 % | 49 (H)   | 6.08  |
| <b>influenza</b>                        | 1.45(1.33-1.57) | 8.42  | +2.62 %  | 38 (H)   | 1.41(1.26-1.58) | 8.21  | +2.41 %  | 41 (H)   | 1.34(1.25-1.44)    | 7.81  | +2.01 % | 50 (H)   | 5.80  |
| <b>pneumonia</b>                        | 1.46(1.18-1.81) | 0.62  | +0.20 %  | 505 (H)  | 1.43(1.06-1.93) | 0.61  | +0.19 %  | 538 (H)  | 1.44(1.19-1.74)    | 0.61  | +0.19 % | 527 (H)  | 0.42  |
| <b>COPD</b>                             | 1.65(1.44-1.89) | 8.93  | +3.53 %  | 28 (H)   | 1.28(1.03-1.58) | 6.94  | +1.54 %  | 65 (H)   | 1.32(1.16-1.51)    | 7.15  | +1.75 % | 57 (H)   | 5.40  |
| <b>COPD</b>                             | 2.11(1.53-2.92) | 0.54  | +0.29 %  | 349 (H)  | -               | -     | -        | -        | -                  | -     | -       | -        | 0.25  |
| <b>digestive all</b>                    | 1.13(1.07-1.19) | 6.71  | +0.78 %  | 128 (H)  | 1.16(1.08-1.25) | 6.94  | +1.01 %  | 99 (H)   | 1.14(1.09-1.20)    | 6.80  | +0.87 % | 114 (H)  | 5.93  |
| <b>endocrine all</b>                    | 1.24(1.16-1.34) | 3.44  | +0.69 %  | 145 (H)  | 1.31(1.17-1.45) | 3.61  | +0.86 %  | 117 (H)  | 1.42(1.33-1.51)    | 3.92  | +1.16 % | 86 (H)   | 2.75  |
| <b>obesity</b>                          | 1.19(1.08-1.30) | 1.33  | +0.22 %  | 465 (H)  | 1.40(1.23-1.59) | 1.57  | +0.45 %  | 221 (H)  | 1.47(1.36-1.59)    | 1.66  | +0.54 % | 186 (H)  | 1.12  |
| <b>genitourinary all</b>                | 1.17(1.08-1.27) | 3.36  | +0.51 %  | 197 (H)  | 1.27(1.13-1.42) | 3.62  | +0.77 %  | 129 (H)  | 1.23(1.14-1.32)    | 3.51  | +0.66 % | 152 (H)  | 2.85  |
| <b>kidney infection</b>                 | 1.41(1.16-1.73) | 1.14  | +0.34 %  | 296 (H)  | 1.28(0.96-1.72) | -     | -        | -        | 1.25(1.04-1.50)    | 1.00  | +0.20 % | 493 (H)  | 0.80  |
| <b>musculoskeletal all</b>              | 1.15(1.10-1.19) | 10.30 | +1.35 %  | 74 (H)   | 1.21(1.15-1.28) | 10.91 | +1.96 %  | 51 (H)   | 1.18(1.14-1.22)    | 10.63 | +1.67 % | 60 (H)   | 8.95  |
| <b>neoplasms all</b>                    | 1.19(1.10-1.29) | 3.23  | +0.53 %  | 188 (H)  | 1.22(1.09-1.35) | 3.30  | +0.60 %  | 167 (H)  | 1.18(1.10-1.26)    | 3.19  | +0.49 % | 203 (H)  | 2.70  |
| <b>benign</b>                           | 1.19(1.09-1.29) | 2.72  | +0.44 %  | 227 (H)  | 1.22(1.09-1.37) | 2.79  | +0.51 %  | 195 (H)  | 1.17(1.09-1.26)    | 2.67  | +0.40 % | 253 (H)  | 2.28  |
| <b>circulatory all</b>                  | 1.11(0.99-1.24) | -     | -        | -        | 1.17(0.99-1.37) | -     | -        | -        | 1.25(1.14-1.38)    | 1.40  | +0.29 % | 347 (H)  | 1.12  |
| <b>nervous all</b>                      | 1.35(1.19-1.52) | 1.21  | +0.32 %  | 317 (H)  | 1.50(1.26-1.80) | 1.35  | +0.46 %  | 220 (H)  | 1.24(1.10-1.40)    | 1.11  | +0.22 % | 453 (H)  | 0.89  |
| <b>eye/adnexa all</b>                   | 1.34(1.20-1.49) | 7.74  | +1.98 %  | 50 (H)   | 1.25(1.12-1.39) | 7.21  | +1.46 %  | 69 (H)   | 1.23(1.14-1.32)    | 7.09  | +1.34 % | 75 (H)   | 5.75  |
| <b>mental all</b>                       | 1.19(1.13-1.26) | 3.46  | +0.57 %  | 176 (H)  | 1.22(1.12-1.32) | 3.54  | +0.65 %  | 155 (H)  | 1.22(1.16-1.28)    | 3.53  | +0.64 % | 156 (H)  | 2.89  |

Footnotes:

- CR - Control Risk (i.e. event rate (%) in the control group)
- ER - Experimental Risk (i.e. event rate (%) in the case (surgery) group)
- ARD - Absolute Risk Difference (a.k.a. absolute risk reduction/increase) [ARD=100 X CR X (1-RR)]
- NNT(B/H) - Number Needed to Treat-Benefit or Harm [NNT=100/ARD]
- RR exclusion: Relative risks (RR) are presented only for analyses with sufficient power for hypothesis testing (see methods)
  - > e.g. there was insufficient power for testing COPD and eczema/dermatitis in the tonsillectomy analysis
- ER, ARD and NNT exclusion: these values are presented only when Bonferroni corrected p-value (78 tests;  $\alpha=0.05/78=0.000641$ ) for relative risks (RR) were significant
  - > Bonferroni corrected p-values are given in Fig.1

**Table S5 - Full Cox regression outputs - impact of tonsillectomy on risk of later disease.**

| <b>1. Infectious/parasitic - all</b> | <b>exp(coef)</b> | <b>LCL</b> | <b>UCL</b> | <b>SE</b> | <b>Z</b> | <b>Pr(Z)</b> |
|--------------------------------------|------------------|------------|------------|-----------|----------|--------------|
| surgery                              | 1.2299           | 1.1194     | 1.3513     | 0.0480    | 4.3098   | <0.0001      |
| paternal age                         | 0.9947           | 0.9810     | 1.0087     | 0.0071    | -0.7329  | 0.4636       |
| maternal age                         | 0.9712           | 0.9558     | 0.9869     | 0.0081    | -3.5733  | 0.0003       |
| gestation length                     | 0.9861           | 0.9751     | 0.9973     | 0.0057    | -2.4194  | 0.0155       |
| maternal bleeding                    | 1.1194           | 1.0770     | 1.1634     | 0.0196    | 5.7323   | <0.0001      |
| fetal oxygen deprivation             | 0.8436           | 0.6517     | 1.0920     | 0.1316    | -1.2912  | 0.1966       |
| pregnancy oedema                     | 1.0568           | 0.9652     | 1.1572     | 0.0462    | 1.1950   | 0.2320       |
| apgar5 score                         | 1.0457           | 1.0014     | 1.0920     | 0.0221    | 2.0252   | 0.0428       |
| birth weight                         | 0.9927           | 0.9823     | 1.0033     | 0.0053    | -1.3437  | 0.1790       |
| preexisting hypertension             | 1.0271           | 0.7882     | 1.3386     | 0.1351    | 0.1985   | 0.8425       |
| preexisting diabetes                 | 1.0522           | 0.8787     | 1.2598     | 0.0919    | 0.5536   | 0.5798       |
| previous induced abortion            | 1.0906           | 1.0627     | 1.1192     | 0.0132    | 6.5663   | <0.0001      |
| previous spontaneous abortion        | 1.0458           | 1.0166     | 1.0758     | 0.0144    | 3.0998   | 0.0019       |
| education level                      | 0.9900           | 0.9781     | 1.0020     | 0.0061    | -1.6313  | 0.1028       |
| parental income                      | 0.9885           | 0.9759     | 1.0013     | 0.0065    | -1.7547  | 0.0793       |
| country                              | 1.2804           | 1.2213     | 1.3424     | 0.0241    | 10.2439  | <0.0001      |
| region Sjælland                      | 0.7832           | 0.7584     | 0.8088     | 0.0164    | -14.8789 | <0.0001      |
| region Syddanmark                    | 0.6843           | 0.6647     | 0.7045     | 0.0148    | -25.6018 | <0.0001      |
| region Midtjylland                   | 0.7016           | 0.6819     | 0.7219     | 0.0145    | -24.3924 | <0.0001      |
| region Nordjylland                   | 0.6145           | 0.5910     | 0.6388     | 0.0198    | -24.5179 | <0.0001      |
| mother with disorder                 | 1.3909           | 1.3469     | 1.4363     | 0.0163    | 20.1262  | <0.0001      |
| father with disorder                 | 1.2472           | 1.2058     | 1.2901     | 0.0172    | 12.8118  | <0.0001      |

| <b>2. Allergic - all</b>      | <b>exp(coef)</b> | <b>LCL</b> | <b>UCL</b> | <b>SE</b> | <b>Z</b> | <b>Pr(Z)</b> |
|-------------------------------|------------------|------------|------------|-----------|----------|--------------|
| surgery                       | 1.3559           | 1.1909     | 1.5437     | 0.0661    | 4.5999   | <0.0001      |
| paternal age                  | 1.0028           | 0.9823     | 1.0237     | 0.0105    | 0.2697   | 0.7873       |
| maternal age                  | 1.0314           | 1.0074     | 1.0559     | 0.0119    | 2.5806   | 0.0098       |
| gestation length              | 0.9966           | 0.9806     | 1.0130     | 0.0082    | -0.3994  | 0.6895       |
| maternal bleeding             | 1.1283           | 1.0672     | 1.1928     | 0.0283    | 4.2562   | <0.0001      |
| fetal oxygen deprivation      | 0.6123           | 0.3902     | 0.9609     | 0.2298    | -2.1331  | 0.0329       |
| pregnancy oedema              | 1.2471           | 1.1032     | 1.4097     | 0.0625    | 3.5317   | 0.0004       |
| apgar5 score                  | 1.0872           | 1.0233     | 1.1551     | 0.0308    | 2.7074   | 0.0067       |
| birth weight                  | 0.9774           | 0.9624     | 0.9926     | 0.0078    | -2.8975  | 0.0037       |
| preexisting hypertension      | 0.6993           | 0.4403     | 1.1107     | 0.2360    | -1.5148  | 0.1298       |
| preexisting diabetes          | 1.0535           | 0.8035     | 1.3812     | 0.1381    | 0.3771   | 0.7060       |
| previous induced abortion     | 1.0356           | 0.9964     | 1.0763     | 0.0196    | 1.7799   | 0.0750       |
| previous spontaneous abortion | 1.0442           | 1.0017     | 1.0884     | 0.0211    | 2.0434   | 0.0410       |
| education level               | 1.0645           | 1.0457     | 1.0837     | 0.0090    | 6.8851   | <0.0001      |
| parental income               | 1.0197           | 1.0006     | 1.0392     | 0.0096    | 2.0228   | 0.0430       |
| country                       | 1.4006           | 1.3052     | 1.5031     | 0.0360    | 9.3580   | <0.0001      |
| region Sjælland               | 0.7015           | 0.6664     | 0.7385     | 0.0262    | -13.5225 | <0.0001      |
| region Syddanmark             | 1.0262           | 0.9858     | 1.0682     | 0.0204    | 1.2652   | 0.2057       |
| region Midtjylland            | 0.7817           | 0.7492     | 0.8156     | 0.0216    | -11.3641 | <0.0001      |
| region Nordjylland            | 0.7070           | 0.6675     | 0.7489     | 0.0293    | -11.8104 | <0.0001      |
| mother with disorder          | 1.8600           | 1.7403     | 1.9879     | 0.0339    | 18.2820  | <0.0001      |
| father with disorder          | 1.7478           | 1.6085     | 1.8991     | 0.0423    | 13.1795  | <0.0001      |



| 3. Allergic - rhinitis        | exp(coef) | LCL    | UCL    | SE     | Z       | Pr(Z)   |
|-------------------------------|-----------|--------|--------|--------|---------|---------|
|                               | surgery   | 1.5382 | 1.2932 | 1.8295 | 0.0885  | 4.8655  |
| paternal age                  | 1.0128    | 0.9834 | 1.0431 | 0.0150 | 0.8486  | 0.3960  |
| maternal age                  | 1.0714    | 1.0362 | 1.1077 | 0.0170 | 4.0537  | <0.0001 |
| gestation length              | 1.0011    | 0.9786 | 1.0241 | 0.0116 | 0.0966  | 0.9230  |
| maternal bleeding             | 1.0580    | 0.9760 | 1.1469 | 0.0411 | 1.3719  | 0.1700  |
| fetal oxygen deprivation      | 0.5662    | 0.2942 | 1.0896 | 0.3339 | -1.7028 | 0.0885  |
| pregnancy oedema              | 1.1823    | 0.9899 | 1.4121 | 0.0906 | 1.8482  | 0.0645  |
| apgar5 score                  | 1.0991    | 1.0109 | 1.1950 | 0.0427 | 2.2138  | 0.0268  |
| birth weight                  | 0.9839    | 0.9628 | 1.0054 | 0.0110 | -1.4639 | 0.1432  |
| preexisting hypertension      | 0.6089    | 0.3042 | 1.2185 | 0.3539 | -1.4015 | 0.1610  |
| preexisting diabetes          | 0.7827    | 0.5040 | 1.2157 | 0.2246 | -1.0901 | 0.2756  |
| previous induced abortion     | 0.9982    | 0.9442 | 1.0552 | 0.0283 | -0.0617 | 0.9507  |
| previous spontaneous abortion | 1.0399    | 0.9808 | 1.1027 | 0.0298 | 1.3124  | 0.1893  |
| education level               | 1.1277    | 1.0994 | 1.1567 | 0.0129 | 9.2748  | <0.0001 |
| parental income               | 1.0268    | 0.9994 | 1.0550 | 0.0138 | 1.9173  | 0.0551  |
| country                       | 1.4448    | 1.2992 | 1.6067 | 0.0542 | 6.7892  | <0.0001 |
| region Sjælland               | 0.8918    | 0.8250 | 0.9640 | 0.0397 | -2.8818 | 0.0039  |
| region Syddanmark             | 1.7541    | 1.6552 | 1.8589 | 0.0296 | 18.9800 | <0.0001 |
| region Midtjylland            | 1.1054    | 1.0377 | 1.1776 | 0.0322 | 3.1079  | 0.0018  |
| region Nordjylland            | 1.2850    | 1.1904 | 1.3870 | 0.0389 | 6.4311  | <0.0001 |
| mother with disorder          | 3.1501    | 2.8050 | 3.5376 | 0.0591 | 19.3836 | <0.0001 |
| father with disorder          | 2.8009    | 2.4327 | 3.2248 | 0.0719 | 14.3247 | <0.0001 |

| 4. Allergic - conjunctivitis  | exp(coef) | LCL    | UCL    | SE       | Z       | Pr(Z)   |
|-------------------------------|-----------|--------|--------|----------|---------|---------|
|                               | surgery   | 1.5005 | 1.0326 | 2.1804   | 0.1906  | 2.1284  |
| paternal age                  | 1.0129    | 0.9517 | 1.0780 | 0.0317   | 0.4051  | 0.6853  |
| maternal age                  | 1.0698    | 0.9969 | 1.1482 | 0.0360   | 1.8741  | 0.0609  |
| gestation length              | 1.0263    | 0.9780 | 1.0769 | 0.0245   | 1.0580  | 0.2900  |
| maternal bleeding             | 1.2087    | 1.0277 | 1.4216 | 0.0827   | 2.2901  | 0.0220  |
| fetal oxygen deprivation      | 0.0000    | 0.0000 | Inf    | 375.9072 | -0.0339 | 0.9729  |
| pregnancy oedema              | 1.4339    | 1.0084 | 2.0389 | 0.1795   | 2.0068  | 0.0447  |
| apgar5 score                  | 1.1163    | 0.9374 | 1.3295 | 0.0891   | 1.2352  | 0.2167  |
| birth weight                  | 1.0095    | 0.9640 | 1.0572 | 0.0235   | 0.4047  | 0.6856  |
| preexisting hypertension      | 0.3289    | 0.0462 | 2.3384 | 1.0007   | -1.1110 | 0.2665  |
| preexisting diabetes          | 1.2502    | 0.5928 | 2.6367 | 0.3807   | 0.5866  | 0.5574  |
| previous induced abortion     | 1.0699    | 0.9532 | 1.2010 | 0.0589   | 1.1477  | 0.2510  |
| previous spontaneous abortion | 1.1904    | 1.0563 | 1.3415 | 0.0609   | 2.8598  | 0.0042  |
| education level               | 1.0669    | 1.0107 | 1.1262 | 0.0275   | 2.3469  | 0.0189  |
| parental income               | 1.0354    | 0.9770 | 1.0974 | 0.0296   | 1.1763  | 0.2394  |
| country                       | 1.6231    | 1.3202 | 1.9953 | 0.1053   | 4.5974  | <0.0001 |
| region Sjælland               | 0.6811    | 0.5728 | 0.8099 | 0.0883   | -4.3463 | <0.0001 |
| region Syddanmark             | 1.9167    | 1.7072 | 2.1518 | 0.0590   | 11.0194 | <0.0001 |
| region Midtjylland            | 0.7041    | 0.6083 | 0.8148 | 0.0745   | -4.7063 | <0.0001 |
| region Nordjylland            | 0.9790    | 0.8251 | 1.1617 | 0.0872   | -0.2420 | 0.8087  |
| mother with disorder          | 1.7031    | 0.8103 | 3.5793 | 0.3789   | 1.4050  | 0.1600  |
| father with disorder          | 2.9024    | 1.3805 | 6.1024 | 0.3791   | 2.8104  | 0.0049  |

| <b>5. Allergic - eczema/dermatitis</b> | <b>exp(coef)</b> | <b>LCL</b> | <b>UCL</b> | <b>SE</b> | <b>Z</b> | <b>Pr(Z)</b> |
|----------------------------------------|------------------|------------|------------|-----------|----------|--------------|
| surgery                                | 1.1019           | 0.8381     | 1.4486     | 0.1395    | 0.6953   | 0.4868       |
| paternal age                           | 0.9902           | 0.9521     | 1.0299     | 0.0200    | -0.4867  | 0.6264       |
| maternal age                           | 0.9997           | 0.9558     | 1.0456     | 0.0229    | -0.0115  | 0.9907       |
| gestation length                       | 1.0213           | 0.9900     | 1.0535     | 0.0158    | 1.3308   | 0.1832       |
| maternal bleeding                      | 1.2004           | 1.0824     | 1.3313     | 0.0527    | 3.4607   | 0.0005       |
| fetal oxygen deprivation               | 0.6863           | 0.3077     | 1.5305     | 0.4091    | -0.9198  | 0.3576       |
| pregnancy oedema                       | 1.3341           | 1.0635     | 1.6736     | 0.1156    | 2.4927   | 0.0126       |
| apgar5 score                           | 1.0482           | 0.9309     | 1.1802     | 0.0605    | 0.7785   | 0.4362       |
| birth weight                           | 0.9805           | 0.9521     | 1.0098     | 0.0149    | -1.3066  | 0.1913       |
| preexisting hypertension               | 0.7147           | 0.2971     | 1.7194     | 0.4478    | -0.7497  | 0.4534       |
| preexisting diabetes                   | 1.1093           | 0.6667     | 1.8459     | 0.2598    | 0.3995   | 0.6895       |
| previous induced abortion              | 1.0811           | 1.0060     | 1.1619     | 0.0367    | 2.1234   | 0.0337       |
| previous spontaneous abortion          | 1.0661           | 0.9856     | 1.1531     | 0.0400    | 1.5993   | 0.1097       |
| education level                        | 1.0391           | 1.0044     | 1.0749     | 0.0173    | 2.2178   | 0.0265       |
| parental income                        | 1.0532           | 1.0161     | 1.0917     | 0.0183    | 2.8335   | 0.0046       |
| country                                | 1.2574           | 1.0953     | 1.4436     | 0.0704    | 3.2532   | 0.0011       |
| region Sjælland                        | 0.6079           | 0.5509     | 0.6707     | 0.0501    | -9.9151  | <0.0001      |
| region Syddanmark                      | 0.8919           | 0.8269     | 0.9620     | 0.0386    | -2.9625  | 0.0030       |
| region Midtjylland                     | 0.8007           | 0.7414     | 0.8647     | 0.0392    | -5.6603  | <0.0001      |
| region Nordjylland                     | 0.3985           | 0.3492     | 0.4547     | 0.0673    | -13.6625 | <0.0001      |
| mother with disorder                   | 2.4342           | 2.0175     | 2.9370     | 0.0958    | 9.2859   | <0.0001      |
| father with disorder                   | 1.9319           | 1.4446     | 2.5836     | 0.1482    | 4.4407   | <0.0001      |

| <b>6. Allergic - urticaria/angiodema</b> | <b>exp(coef)</b> | <b>LCL</b> | <b>UCL</b> | <b>SE</b> | <b>Z</b> | <b>Pr(Z)</b> |
|------------------------------------------|------------------|------------|------------|-----------|----------|--------------|
| surgery                                  | 1.4662           | 1.1556     | 1.8604     | 0.1214    | 3.1505   | 0.0016       |
| paternal age                             | 1.0023           | 0.9639     | 1.0422     | 0.0199    | 0.1173   | 0.9065       |
| maternal age                             | 0.9915           | 0.9481     | 1.0369     | 0.0228    | -0.3720  | 0.7098       |
| gestation length                         | 0.9868           | 0.9561     | 1.0185     | 0.0161    | -0.8205  | 0.4118       |
| maternal bleeding                        | 1.2402           | 1.1191     | 1.3744     | 0.0524    | 4.1074   | <0.0001      |
| fetal oxygen deprivation                 | 0.5421           | 0.2031     | 1.4470     | 0.5008    | -1.2221  | 0.2216       |
| pregnancy oedema                         | 1.5418           | 1.2480     | 1.9049     | 0.1078    | 4.0139   | <0.0001      |
| apgar5 score                             | 1.1011           | 0.9793     | 1.2380     | 0.0598    | 1.6112   | 0.1071       |
| birth weight                             | 0.9722           | 0.9436     | 1.0018     | 0.0152    | -1.8420  | 0.0654       |
| preexisting hypertension                 | 0.7370           | 0.3062     | 1.7736     | 0.4480    | -0.6809  | 0.4958       |
| preexisting diabetes                     | 1.3225           | 0.8302     | 2.1068     | 0.2375    | 1.1769   | 0.2392       |
| previous induced abortion                | 1.0636           | 0.9886     | 1.1443     | 0.0373    | 1.6533   | 0.0982       |
| previous spontaneous abortion            | 1.0419           | 0.9619     | 1.1287     | 0.0407    | 1.0082   | 0.3133       |
| education level                          | 1.0362           | 1.0016     | 1.0720     | 0.0173    | 2.0542   | 0.0399       |
| parental income                          | 0.9716           | 0.9373     | 1.0071     | 0.0182    | -1.5732  | 0.1156       |
| country                                  | 1.5065           | 1.3342     | 1.7011     | 0.0619    | 6.6140   | <0.0001      |
| region Sjælland                          | 0.5995           | 0.5467     | 0.6575     | 0.0471    | -10.8578 | <0.0001      |
| region Syddanmark                        | 0.6471           | 0.5988     | 0.6993     | 0.0395    | -10.9932 | <0.0001      |
| region Midtjylland                       | 0.4922           | 0.4527     | 0.5352     | 0.0426    | -16.6034 | <0.0001      |
| region Nordjylland                       | 0.3523           | 0.3096     | 0.4009     | 0.0659    | -15.8221 | <0.0001      |
| mother with disorder                     | 1.9543           | 1.6053     | 2.3791     | 0.1003    | 6.6767   | <0.0001      |
| father with disorder                     | 1.4122           | 1.0653     | 1.8720     | 0.1438    | 2.4003   | 0.0163       |

| 7. Skin - all                 | exp(coef) | LCL    | UCL    | SE     | Z        | Pr(Z)   |
|-------------------------------|-----------|--------|--------|--------|----------|---------|
|                               | surgery   | 1.3924 | 1.2939 | 1.4985 | 0.0374   | 8.8447  |
| paternal age                  | 0.9912    | 0.9796 | 1.0029 | 0.0059 | -1.4631  | 0.1434  |
| maternal age                  | 0.9513    | 0.9385 | 0.9642 | 0.0069 | -7.2204  | <0.0001 |
| gestation length              | 0.9959    | 0.9865 | 1.0054 | 0.0048 | -0.8331  | 0.4047  |
| maternal bleeding             | 1.0664    | 1.0318 | 1.1021 | 0.0167 | 3.8285   | 0.0001  |
| fetal oxygen deprivation      | 0.8474    | 0.6903 | 1.0402 | 0.1045 | -1.5822  | 0.1135  |
| pregnancy oedema              | 1.1205    | 1.0428 | 1.2041 | 0.0366 | 3.1024   | 0.0019  |
| apgar5 score                  | 1.0923    | 1.0541 | 1.1319 | 0.0181 | 4.8674   | <0.0001 |
| birth weight                  | 1.0216    | 1.0125 | 1.0307 | 0.0045 | 4.6988   | <0.0001 |
| preexisting hypertension      | 1.0325    | 0.8230 | 1.2953 | 0.1157 | 0.2767   | 0.7819  |
| preexisting diabetes          | 1.1552    | 1.0013 | 1.3328 | 0.0729 | 1.9787   | 0.0478  |
| previous induced abortion     | 1.0887    | 1.0650 | 1.1130 | 0.0112 | 7.5617   | <0.0001 |
| previous spontaneous abortion | 1.0473    | 1.0223 | 1.0729 | 0.0123 | 3.7505   | 0.0001  |
| education level               | 0.9642    | 0.9544 | 0.9741 | 0.0052 | -6.9593  | <0.0001 |
| parental income               | 0.9686    | 0.9580 | 0.9792 | 0.0055 | -5.7084  | <0.0001 |
| country                       | 1.3015    | 1.2506 | 1.3546 | 0.0203 | 12.9285  | <0.0001 |
| region Sjælland               | 0.7931    | 0.7709 | 0.8159 | 0.0144 | -16.0040 | <0.0001 |
| region Syddanmark             | 0.8648    | 0.8442 | 0.8860 | 0.0123 | -11.7786 | <0.0001 |
| region Midtjylland            | 0.8520    | 0.8319 | 0.8727 | 0.0122 | -13.0988 | <0.0001 |
| region Nordjylland            | 0.5931    | 0.5727 | 0.6143 | 0.0179 | -29.1776 | <0.0001 |
| mother with disorder          | 1.3334    | 1.3002 | 1.3674 | 0.0128 | 22.3863  | <0.0001 |
| father with disorder          | 1.2956    | 1.2626 | 1.3296 | 0.0131 | 19.6305  | <0.0001 |

| 8. Autoimmune - all           | exp(coef) | LCL    | UCL    | SE     | Z        | Pr(Z)   |
|-------------------------------|-----------|--------|--------|--------|----------|---------|
|                               | surgery   | 1.1522 | 1.0218 | 1.2993 | 0.0612   | 2.3122  |
| paternal age                  | 0.9820    | 0.9646 | 0.9997 | 0.0091 | -1.9900  | 0.0465  |
| maternal age                  | 0.9716    | 0.9520 | 0.9916 | 0.0104 | -2.7653  | 0.0056  |
| gestation length              | 0.9930    | 0.9791 | 1.0071 | 0.0072 | -0.9706  | 0.3317  |
| maternal bleeding             | 1.0831    | 1.0313 | 1.1376 | 0.0250 | 3.1916   | 0.0014  |
| fetal oxygen deprivation      | 1.0618    | 0.7993 | 1.4106 | 0.1448 | 0.4144   | 0.6785  |
| pregnancy oedema              | 1.2177    | 1.0967 | 1.3520 | 0.0533 | 3.6904   | 0.0002  |
| apgar5 score                  | 0.9849    | 0.9319 | 1.0409 | 0.0282 | -0.5370  | 0.5912  |
| birth weight                  | 0.9945    | 0.9814 | 1.0078 | 0.0067 | -0.8083  | 0.4188  |
| preexisting hypertension      | 1.0167    | 0.7328 | 1.4106 | 0.1670 | 0.0994   | 0.9207  |
| preexisting diabetes          | 1.5193    | 1.2801 | 1.8031 | 0.0873 | 4.7866   | <0.0001 |
| previous induced abortion     | 0.9745    | 0.9419 | 1.0082 | 0.0173 | -1.4853  | 0.1374  |
| previous spontaneous abortion | 1.0515    | 1.0146 | 1.0898 | 0.0182 | 2.7557   | 0.0058  |
| education level               | 0.9912    | 0.9760 | 1.0066 | 0.0078 | -1.1132  | 0.2655  |
| parental income               | 1.0111    | 0.9946 | 1.0279 | 0.0083 | 1.3186   | 0.1872  |
| country                       | 0.8997    | 0.8386 | 0.9651 | 0.0358 | -2.9485  | 0.0031  |
| region Sjælland               | 0.9677    | 0.9285 | 1.0085 | 0.0211 | -1.5543  | 0.1201  |
| region Syddanmark             | 0.9810    | 0.9460 | 1.0173 | 0.0185 | -1.0317  | 0.3021  |
| region Midtjylland            | 0.9185    | 0.8855 | 0.9527 | 0.0186 | -4.5572  | <0.0001 |
| region Nordjylland            | 0.7750    | 0.7377 | 0.8142 | 0.0251 | -10.1141 | <0.0001 |
| mother with disorder          | 1.5399    | 1.4781 | 1.6043 | 0.0208 | 20.6582  | <0.0001 |
| father with disorder          | 1.4445    | 1.3836 | 1.5081 | 0.0219 | 16.7272  | <0.0001 |

| 9. Respiratory - all          | exp(coef) | LCL    | UCL    | SE     | Z        | Pr(Z)   |
|-------------------------------|-----------|--------|--------|--------|----------|---------|
|                               | surgery   | 1.4400 | 0.7488 | 2.7688 | 0.3335   | 1.0931  |
| paternal age                  | 0.9997    | 0.9879 | 1.0117 | 0.0060 | -0.0369  | 0.9705  |
| maternal age                  | 0.9594    | 0.9463 | 0.9727 | 0.0070 | -5.9061  | <0.0001 |
| gestation length              | 0.9853    | 0.9759 | 0.9949 | 0.0049 | -2.9920  | 0.0027  |
| maternal bleeding             | 1.0835    | 1.0475 | 1.1207 | 0.0172 | 4.6531   | <0.0001 |
| fetal oxygen deprivation      | 0.9174    | 0.7402 | 1.1369 | 0.1094 | -0.7875  | 0.4309  |
| pregnancy oedema              | 1.1043    | 1.0234 | 1.1917 | 0.0388 | 2.5568   | 0.0105  |
| apgar5 score                  | 1.0526    | 1.0145 | 1.0922 | 0.0188 | 2.7254   | 0.0064  |
| birth weight                  | 1.0013    | 0.9923 | 1.0104 | 0.0046 | 0.2992   | 0.7647  |
| preexisting hypertension      | 1.1665    | 0.9426 | 1.4436 | 0.1087 | 1.4171   | 0.1564  |
| preexisting diabetes          | 1.0098    | 0.8614 | 1.1838 | 0.0811 | 0.1208   | 0.9038  |
| previous induced abortion     | 1.0563    | 1.0328 | 1.0804 | 0.0114 | 4.7721   | <0.0001 |
| previous spontaneous abortion | 1.0332    | 1.0082 | 1.0587 | 0.0124 | 2.6181   | 0.0088  |
| education level               | 1.0009    | 0.9906 | 1.0113 | 0.0052 | 0.1779   | 0.8587  |
| parental income               | 0.9741    | 0.9633 | 0.9850 | 0.0056 | -4.6215  | <0.0001 |
| country                       | 1.2269    | 1.1770 | 1.2790 | 0.0211 | 9.6535   | <0.0001 |
| region Sjælland               | 0.8113    | 0.7885 | 0.8348 | 0.0145 | -14.3802 | <0.0001 |
| region Syddanmark             | 0.8773    | 0.8563 | 0.8989 | 0.0123 | -10.5596 | <0.0001 |
| region Midtjylland            | 0.7366    | 0.7185 | 0.7552 | 0.0127 | -24.0311 | <0.0001 |
| region Nordjylland            | 0.7293    | 0.7061 | 0.7533 | 0.0165 | -19.1266 | <0.0001 |
| mother with disorder          | 1.3296    | 1.3012 | 1.3586 | 0.0110 | 25.8778  | <0.0001 |
| father with disorder          | 1.2409    | 1.2142 | 1.2683 | 0.0111 | 19.4347  | <0.0001 |

| 10. Respiratory - upper       | exp(coef) | LCL    | UCL    | SE     | Z        | Pr(Z)   |
|-------------------------------|-----------|--------|--------|--------|----------|---------|
|                               | surgery   | 2.7275 | 1.5479 | 4.8062 | 0.2890   | 3.4715  |
| paternal age                  | 1.0015    | 0.9868 | 1.0165 | 0.0075 | 0.2086   | 0.8347  |
| maternal age                  | 0.9667    | 0.9503 | 0.9833 | 0.0086 | -3.8974  | <0.0001 |
| gestation length              | 0.9926    | 0.9809 | 1.0045 | 0.0060 | -1.2117  | 0.2256  |
| maternal bleeding             | 1.0770    | 1.0332 | 1.1226 | 0.0211 | 3.5040   | 0.0004  |
| fetal oxygen deprivation      | 0.8364    | 0.6316 | 1.1075 | 0.1432 | -1.2466  | 0.2125  |
| pregnancy oedema              | 1.1379    | 1.0373 | 1.2483 | 0.0472 | 2.7367   | 0.0062  |
| apgar5 score                  | 1.0880    | 1.0405 | 1.1376 | 0.0227 | 3.7046   | 0.0002  |
| birth weight                  | 1.0024    | 0.9913 | 1.0137 | 0.0056 | 0.4313   | 0.6662  |
| preexisting hypertension      | 1.1326    | 0.8669 | 1.4797 | 0.1363 | 0.9131   | 0.3611  |
| preexisting diabetes          | 0.9443    | 0.7705 | 1.1572 | 0.1037 | -0.5522  | 0.5807  |
| previous induced abortion     | 1.0955    | 1.0657 | 1.1260 | 0.0140 | 6.4950   | <0.0001 |
| previous spontaneous abortion | 1.0321    | 1.0014 | 1.0637 | 0.0153 | 2.0553   | 0.0398  |
| education level               | 1.0128    | 0.9999 | 1.0258 | 0.0065 | 1.9505   | 0.0511  |
| parental income               | 0.9899    | 0.9764 | 1.0035 | 0.0070 | -1.4477  | 0.1476  |
| country                       | 1.4076    | 1.3397 | 1.4788 | 0.0252 | 13.5635  | <0.0001 |
| region Sjælland               | 0.8285    | 0.7998 | 0.8582 | 0.0179 | -10.4782 | <0.0001 |
| region Syddanmark             | 0.9349    | 0.9076 | 0.9631 | 0.0151 | -4.4418  | <0.0001 |
| region Midtjylland            | 0.7404    | 0.7177 | 0.7638 | 0.0158 | -18.9470 | <0.0001 |
| region Nordjylland            | 0.7012    | 0.6730 | 0.7306 | 0.0209 | -16.9242 | <0.0001 |
| mother with disorder          | 1.3801    | 1.3365 | 1.4251 | 0.0163 | 19.6833  | <0.0001 |
| father with disorder          | 1.2905    | 1.2480 | 1.3345 | 0.0170 | 14.9346  | <0.0001 |

| 11. Respiratory - lower       | exp(coef) | LCL    | UCL    | SE     | Z        | Pr(Z)   |
|-------------------------------|-----------|--------|--------|--------|----------|---------|
|                               | surgery   | 1.2455 | 1.0126 | 1.5321 | 0.1056   | 2.0790  |
| paternal age                  | 1.0082    | 0.9776 | 1.0397 | 0.0157 | 0.5222   | 0.6014  |
| maternal age                  | 0.9128    | 0.8807 | 0.9459 | 0.0182 | -5.0081  | <0.0001 |
| gestation length              | 0.9405    | 0.9170 | 0.9645 | 0.0128 | -4.7639  | <0.0001 |
| maternal bleeding             | 1.1599    | 1.0662 | 1.2618 | 0.0429 | 3.4536   | 0.0005  |
| fetal oxygen deprivation      | 0.8676    | 0.4919 | 1.5305 | 0.2895 | -0.4900  | 0.6240  |
| pregnancy oedema              | 1.1776    | 0.9752 | 1.4220 | 0.0962 | 1.6992   | 0.0892  |
| apgar5 score                  | 1.1187    | 1.0193 | 1.2278 | 0.0474 | 2.3625   | 0.0181  |
| birth weight                  | 0.9817    | 0.9586 | 1.0053 | 0.0121 | -1.5233  | 0.1276  |
| preexisting hypertension      | 1.2347    | 0.7157 | 2.1302 | 0.2782 | 0.7578   | 0.4485  |
| preexisting diabetes          | 1.4446    | 1.0285 | 2.0290 | 0.1733 | 2.1225   | 0.0337  |
| previous induced abortion     | 1.0027    | 0.9444 | 1.0646 | 0.0305 | 0.0904   | 0.9279  |
| previous spontaneous abortion | 1.1349    | 1.0658 | 1.2084 | 0.0320 | 3.9511   | <0.0001 |
| education level               | 0.9658    | 0.9399 | 0.9924 | 0.0138 | -2.5042  | 0.0122  |
| parental income               | 0.9275    | 0.9010 | 0.9549 | 0.0148 | -5.0755  | <0.0001 |
| country                       | 1.0940    | 0.9836 | 1.2168 | 0.0542 | 1.6558   | 0.0977  |
| region Sjælland               | 0.7779    | 0.7235 | 0.8365 | 0.0370 | -6.7823  | <0.0001 |
| region Syddanmark             | 0.7157    | 0.6710 | 0.7633 | 0.0328 | -10.1723 | <0.0001 |
| region Midtjylland            | 0.6392    | 0.5985 | 0.6827 | 0.0335 | -13.3337 | <0.0001 |
| region Nordjylland            | 0.6467    | 0.5938 | 0.7043 | 0.0435 | -10.0182 | <0.0001 |
| mother with disorder          | 1.5768    | 1.4343 | 1.7334 | 0.0483 | 9.4255   | <0.0001 |
| father with disorder          | 1.3687    | 1.2471 | 1.5022 | 0.0474 | 6.6124   | <0.0001 |

| 12. Respiratory - chronic lower | exp(coef) | LCL    | UCL    | SE     | Z        | Pr(Z)   |
|---------------------------------|-----------|--------|--------|--------|----------|---------|
|                                 | surgery   | 1.3922 | 1.2469 | 1.5543 | 0.0562   | 5.8865  |
| paternal age                    | 0.9996    | 0.9821 | 1.0174 | 0.0089 | -0.0401  | 0.9679  |
| maternal age                    | 0.9735    | 0.9539 | 0.9935 | 0.0103 | -2.5811  | 0.0098  |
| gestation length                | 0.9689    | 0.9553 | 0.9826 | 0.0071 | -4.3906  | <0.0001 |
| maternal bleeding               | 1.1222    | 1.0693 | 1.1776 | 0.0246 | 4.6867   | <0.0001 |
| fetal oxygen deprivation        | 0.9788    | 0.7053 | 1.3584 | 0.1671 | -0.1276  | 0.8983  |
| pregnancy oedema                | 1.1210    | 0.9985 | 1.2586 | 0.0590 | 1.9357   | 0.0528  |
| apgar5 score                    | 1.0757    | 1.0207 | 1.1337 | 0.0267 | 2.7253   | 0.0064  |
| birth weight                    | 0.9788    | 0.9657 | 0.9920 | 0.0068 | -3.1255  | 0.0017  |
| preexisting hypertension        | 0.8536    | 0.5964 | 1.2217 | 0.1828 | -0.8650  | 0.3869  |
| preexisting diabetes            | 0.9364    | 0.7385 | 1.1874 | 0.1211 | -0.5417  | 0.5879  |
| previous induced abortion       | 1.0199    | 0.9863 | 1.0547 | 0.0171 | 1.1548   | 0.2481  |
| previous spontaneous abortion   | 1.0553    | 1.0178 | 1.0941 | 0.0184 | 2.9219   | 0.0034  |
| education level                 | 1.0239    | 1.0080 | 1.0401 | 0.0079 | 2.9670   | 0.0030  |
| parental income                 | 0.9440    | 0.9283 | 0.9599 | 0.0085 | -6.7432  | <0.0001 |
| country                         | 0.9591    | 0.8990 | 1.0232 | 0.0330 | -1.2630  | 0.2065  |
| region Sjælland                 | 0.8108    | 0.7768 | 0.8463 | 0.0218 | -9.5984  | <0.0001 |
| region Syddanmark               | 0.9658    | 0.9318 | 1.0010 | 0.0182 | -1.8999  | 0.0574  |
| region Midtjylland              | 0.7513    | 0.7235 | 0.7803 | 0.0192 | -14.8149 | <0.0001 |
| region Nordjylland              | 0.8606    | 0.8215 | 0.9017 | 0.0237 | -6.3126  | <0.0001 |
| mother with disorder            | 1.9910    | 1.9002 | 2.0862 | 0.0238 | 28.9090  | <0.0001 |
| father with disorder            | 1.7675    | 1.6773 | 1.8626 | 0.0267 | 21.3127  | <0.0001 |

| 13. Respiratory - asthma      | exp(coef) | LCL    | UCL    | SE     | Z        | Pr(Z)   |
|-------------------------------|-----------|--------|--------|--------|----------|---------|
|                               | surgery   | 1.4159 | 1.2684 | 1.5806 | 0.0561   | 6.1961  |
| paternal age                  | 1.0091    | 0.9914 | 1.0272 | 0.0090 | 1.0115   | 0.3117  |
| maternal age                  | 0.9742    | 0.9545 | 0.9944 | 0.0104 | -2.4931  | 0.0126  |
| gestation length              | 0.9642    | 0.9506 | 0.9779 | 0.0072 | -5.0431  | <0.0001 |
| maternal bleeding             | 1.1287    | 1.0754 | 1.1846 | 0.0246 | 4.9112   | <0.0001 |
| fetal oxygen deprivation      | 1.0129    | 0.7331 | 1.3994 | 0.1649 | 0.0778   | 0.9379  |
| pregnancy oedema              | 1.1048    | 0.9823 | 1.2425 | 0.0599 | 1.6630   | 0.0962  |
| apgar5 score                  | 1.0762    | 1.0210 | 1.1345 | 0.0268 | 2.7351   | 0.0062  |
| birth weight                  | 0.9769    | 0.9638 | 0.9902 | 0.0068 | -3.3816  | 0.0007  |
| preexisting hypertension      | 0.8542    | 0.5968 | 1.2224 | 0.1829 | -0.8615  | 0.3889  |
| preexisting diabetes          | 0.9425    | 0.7433 | 1.1951 | 0.1211 | -0.4884  | 0.6252  |
| previous induced abortion     | 1.0221    | 0.9883 | 1.0572 | 0.0171 | 1.2765   | 0.2017  |
| previous spontaneous abortion | 1.0589    | 1.0211 | 1.0980 | 0.0185 | 3.0920   | 0.0019  |
| education level               | 1.0164    | 1.0005 | 1.0325 | 0.0080 | 2.0324   | 0.0421  |
| parental income               | 0.9381    | 0.9225 | 0.9541 | 0.0085 | -7.4342  | <0.0001 |
| country                       | 0.9375    | 0.8784 | 1.0007 | 0.0332 | -1.9368  | 0.0527  |
| region Sjælland               | 0.8117    | 0.7775 | 0.8475 | 0.0219 | -9.4899  | <0.0001 |
| region Syddanmark             | 0.9631    | 0.9291 | 0.9985 | 0.0183 | -2.0394  | 0.0414  |
| region Midtjylland            | 0.7556    | 0.7274 | 0.7848 | 0.0193 | -14.4720 | <0.0001 |
| region Nordjylland            | 0.8586    | 0.8193 | 0.8998 | 0.0239 | -6.3746  | <0.0001 |
| mother with disorder          | 2.1970    | 2.0877 | 2.3121 | 0.0260 | 30.2113  | <0.0001 |
| father with disorder          | 2.0534    | 1.9294 | 2.1855 | 0.0317 | 22.6292  | <0.0001 |

| 14. Respiratory - influenza   | exp(coef) | LCL    | UCL    | SE     | Z        | Pr(Z)   |
|-------------------------------|-----------|--------|--------|--------|----------|---------|
|                               | surgery   | 1.4366 | 1.0660 | 1.9360 | 0.1522   | 2.3802  |
| paternal age                  | 1.0216    | 0.9735 | 1.0721 | 0.0246 | 0.8708   | 0.3838  |
| maternal age                  | 0.9097    | 0.8600 | 0.9622 | 0.0286 | -3.3020  | 0.0009  |
| gestation length              | 0.9182    | 0.8820 | 0.9559 | 0.0205 | -4.1529  | <0.0001 |
| maternal bleeding             | 1.0935    | 0.9541 | 1.2532 | 0.0695 | 1.2848   | 0.1988  |
| fetal oxygen deprivation      | 1.9670    | 1.0192 | 3.7961 | 0.3354 | 2.0167   | 0.0437  |
| pregnancy oedema              | 1.4519    | 1.0923 | 1.9299 | 0.1452 | 2.5680   | 0.0102  |
| apgar5 score                  | 1.1007    | 0.9486 | 1.2772 | 0.0758 | 1.2654   | 0.2057  |
| birth weight                  | 0.9723    | 0.9358 | 1.0102 | 0.0194 | -1.4389  | 0.1501  |
| preexisting hypertension      | 2.8766    | 1.6261 | 5.0890 | 0.2910 | 3.6304   | 0.0002  |
| preexisting diabetes          | 1.2246    | 0.6916 | 2.1681 | 0.2914 | 0.6952   | 0.4868  |
| previous induced abortion     | 1.0072    | 0.9154 | 1.1081 | 0.0487 | 0.1473   | 0.8828  |
| previous spontaneous abortion | 1.0814    | 0.9765 | 1.1976 | 0.0520 | 1.5039   | 0.1326  |
| education level               | 0.9496    | 0.9099 | 0.9911 | 0.0218 | -2.3665  | 0.0179  |
| parental income               | 0.8955    | 0.8551 | 0.9379 | 0.0235 | -4.6772  | <0.0001 |
| country                       | 1.9006    | 1.6636 | 2.1714 | 0.0679 | 9.4508   | <0.0001 |
| region Sjælland               | 0.7051    | 0.6293 | 0.7900 | 0.0580 | -6.0235  | <0.0001 |
| region Syddanmark             | 0.5638    | 0.5074 | 0.6265 | 0.0537 | -10.6520 | <0.0001 |
| region Midtjylland            | 0.5167    | 0.4640 | 0.5754 | 0.0548 | -12.0318 | <0.0001 |
| region Nordjylland            | 0.4883    | 0.4213 | 0.5659 | 0.0752 | -9.5242  | <0.0001 |
| mother with disorder          | 2.4573    | 1.8937 | 3.1886 | 0.1329 | 6.7638   | <0.0001 |
| father with disorder          | 1.7400    | 1.2126 | 2.4969 | 0.1842 | 3.0064   | 0.0026  |

| 15. Respiratory - pneumonia   | exp(coef) | LCL    | UCL    | SE     | Z        | Pr(Z)   |
|-------------------------------|-----------|--------|--------|--------|----------|---------|
|                               | surgery   | 1.2847 | 1.0395 | 1.5878 | 0.1080   | 2.3184  |
| paternal age                  | 1.0061    | 0.9741 | 1.0391 | 0.0164 | 0.3700   | 0.7113  |
| maternal age                  | 0.9160    | 0.8824 | 0.9509 | 0.0190 | -4.5956  | <0.0001 |
| gestation length              | 0.9419    | 0.9174 | 0.9670 | 0.0134 | -4.4541  | <0.0001 |
| maternal bleeding             | 1.2001    | 1.1004 | 1.3089 | 0.0442 | 4.1241   | <0.0001 |
| fetal oxygen deprivation      | 0.8013    | 0.4304 | 1.4920 | 0.3171 | -0.6981  | 0.4850  |
| pregnancy oedema              | 1.1802    | 0.9685 | 1.4383 | 0.1008 | 1.6428   | 0.1004  |
| apgar5 score                  | 1.1350    | 1.0308 | 1.2498 | 0.0491 | 2.5777   | 0.0099  |
| birth weight                  | 0.9923    | 0.9679 | 1.0173 | 0.0126 | -0.6071  | 0.5437  |
| preexisting hypertension      | 1.3648    | 0.7910 | 2.3550 | 0.2783 | 1.1176   | 0.2637  |
| preexisting diabetes          | 1.4049    | 0.9843 | 2.0052 | 0.1815 | 1.8729   | 0.0610  |
| previous induced abortion     | 0.9962    | 0.9356 | 1.0607 | 0.0319 | -0.1181  | 0.9059  |
| previous spontaneous abortion | 1.1315    | 1.0595 | 1.2084 | 0.0335 | 3.6849   | 0.0002  |
| education level               | 0.9619    | 0.9349 | 0.9897 | 0.0145 | -2.6652  | 0.0076  |
| parental income               | 0.9382    | 0.9101 | 0.9672 | 0.0155 | -4.1069  | <0.0001 |
| country                       | 1.0972    | 0.9820 | 1.2260 | 0.0566 | 1.6398   | 0.1010  |
| region Sjælland               | 0.7543    | 0.6990 | 0.8140 | 0.0388 | -7.2569  | <0.0001 |
| region Syddanmark             | 0.7193    | 0.6727 | 0.7691 | 0.0341 | -9.6461  | <0.0001 |
| region Midtjylland            | 0.6261    | 0.5844 | 0.6708 | 0.0351 | -13.3046 | <0.0001 |
| region Nordjylland            | 0.6020    | 0.5495 | 0.6595 | 0.0465 | -10.8978 | <0.0001 |
| mother with disorder          | 1.5816    | 1.4253 | 1.7551 | 0.0531 | 8.6340   | <0.0001 |
| father with disorder          | 1.3513    | 1.2208 | 1.4957 | 0.0518 | 5.8118   | <0.0001 |

| 16. Respiratory - COPD        | exp(coef) | LCL    | UCL    | SE       | Z       | Pr(Z)   |
|-------------------------------|-----------|--------|--------|----------|---------|---------|
|                               | surgery   | 1.2914 | 0.6683 | 2.4954   | 0.3360  | 0.7609  |
| paternal age                  | 0.9553    | 0.8652 | 1.0547 | 0.0505   | -0.9044 | 0.3657  |
| maternal age                  | 0.9423    | 0.8410 | 1.0558 | 0.0580   | -1.0236 | 0.3059  |
| gestation length              | 1.0288    | 0.9478 | 1.1166 | 0.0418   | 0.6792  | 0.4969  |
| maternal bleeding             | 1.2019    | 0.9185 | 1.5726 | 0.1371   | 1.3408  | 0.1799  |
| fetal oxygen deprivation      | 0.6765    | 0.0947 | 4.8284 | 1.0027   | -0.3897 | 0.6967  |
| pregnancy oedema              | 1.6775    | 1.0459 | 2.6904 | 0.2410   | 2.1463  | 0.0318  |
| apgar5 score                  | 1.2120    | 0.8993 | 1.6333 | 0.1522   | 1.2633  | 0.2064  |
| birth weight                  | 0.8631    | 0.7991 | 0.9323 | 0.0393   | -3.7430 | 0.0001  |
| preexisting hypertension      | 0.0000    | 0.0000 | Inf    | 715.4281 | -0.0182 | 0.9854  |
| preexisting diabetes          | 1.1341    | 0.2813 | 4.5713 | 0.7112   | 0.1769  | 0.8595  |
| previous induced abortion     | 1.1440    | 0.9484 | 1.3800 | 0.0956   | 1.4070  | 0.1594  |
| previous spontaneous abortion | 1.0416    | 0.8447 | 1.2843 | 0.1068   | 0.3815  | 0.7027  |
| education level               | 1.0035    | 0.9190 | 1.0959 | 0.0449   | 0.0795  | 0.9365  |
| parental income               | 0.8012    | 0.7301 | 0.8792 | 0.0473   | -4.6756 | <0.0001 |
| country                       | 1.1277    | 0.8026 | 1.5846 | 0.1735   | 0.6928  | 0.4884  |
| region Sjælland               | 0.8439    | 0.6709 | 1.0615 | 0.1170   | -1.4494 | 0.1472  |
| region Syddanmark             | 0.7189    | 0.5830 | 0.8864 | 0.1068   | -3.0871 | 0.0020  |
| region Midtjylland            | 0.5843    | 0.4675 | 0.7303 | 0.1137   | -4.7227 | <0.0001 |
| region Nordjylland            | 0.7244    | 0.5536 | 0.9480 | 0.1372   | -2.3490 | 0.0188  |
| mother with disorder          | 1.9004    | 1.3296 | 2.7163 | 0.1822   | 3.5232  | 0.0004  |
| father with disorder          | 1.7672    | 1.2534 | 2.4917 | 0.1752   | 3.2487  | 0.0011  |

| 17. Digestive - all           | exp(coef) | LCL    | UCL    | SE     | Z        | Pr(Z)   |
|-------------------------------|-----------|--------|--------|--------|----------|---------|
|                               | surgery   | 1.1695 | 1.0861 | 1.2592 | 0.0377   | 4.1504  |
| paternal age                  | 0.9836    | 0.9729 | 0.9944 | 0.0055 | -2.9569  | 0.0031  |
| maternal age                  | 0.9146    | 0.9031 | 0.9262 | 0.0064 | -13.8939 | <0.0001 |
| gestation length              | 0.9811    | 0.9725 | 0.9897 | 0.0044 | -4.2553  | <0.0001 |
| maternal bleeding             | 1.0617    | 1.0298 | 1.0946 | 0.0155 | 3.8483   | 0.0001  |
| fetal oxygen deprivation      | 1.0670    | 0.8996 | 1.2655 | 0.0870 | 0.7457   | 0.4558  |
| pregnancy oedema              | 1.1270    | 1.0567 | 1.2020 | 0.0328 | 3.6386   | 0.0002  |
| apgar5 score                  | 1.0604    | 1.0256 | 1.0963 | 0.0170 | 3.4448   | 0.0005  |
| birth weight                  | 0.9804    | 0.9724 | 0.9885 | 0.0041 | -4.7078  | <0.0001 |
| preexisting hypertension      | 1.0017    | 0.8085 | 1.2411 | 0.1093 | 0.0159   | 0.9872  |
| preexisting diabetes          | 1.1318    | 0.9854 | 1.2999 | 0.0706 | 1.7524   | 0.0796  |
| previous induced abortion     | 1.0362    | 1.0150 | 1.0579 | 0.0105 | 3.3693   | 0.0007  |
| previous spontaneous abortion | 1.0498    | 1.0267 | 1.0734 | 0.0113 | 4.2864   | <0.0001 |
| education level               | 0.9593    | 0.9502 | 0.9684 | 0.0048 | -8.5621  | <0.0001 |
| parental income               | 0.9852    | 0.9752 | 0.9952 | 0.0051 | -2.8741  | 0.0040  |
| country                       | 0.8471    | 0.8112 | 0.8847 | 0.0221 | -7.4960  | <0.0001 |
| region Sjælland               | 0.9638    | 0.9391 | 0.9891 | 0.0132 | -2.7818  | 0.0054  |
| region Syddanmark             | 1.0317    | 1.0087 | 1.0551 | 0.0114 | 2.7237   | 0.0064  |
| region Midtjylland            | 0.8742    | 0.8542 | 0.8947 | 0.0118 | -11.3621 | <0.0001 |
| region Nordjylland            | 0.9170    | 0.8909 | 0.9438 | 0.0147 | -5.8822  | <0.0001 |
| mother with disorder          | 1.3003    | 1.2775 | 1.3235 | 0.0090 | 29.0573  | <0.0001 |
| father with disorder          | 1.1832    | 1.1625 | 1.2044 | 0.0090 | 18.6474  | <0.0001 |

| 18. Endocrine - all           | exp(coef) | LCL    | UCL    | SE     | Z        | Pr(Z)   |
|-------------------------------|-----------|--------|--------|--------|----------|---------|
|                               | surgery   | 1.3109 | 1.1775 | 1.4594 | 0.0547   | 4.9445  |
| paternal age                  | 0.9506    | 0.9354 | 0.9660 | 0.0082 | -6.1565  | <0.0001 |
| maternal age                  | 0.8678    | 0.8518 | 0.8842 | 0.0095 | -14.8606 | <0.0001 |
| gestation length              | 0.9858    | 0.9728 | 0.9990 | 0.0067 | -2.0925  | 0.0363  |
| maternal bleeding             | 1.0583    | 1.0101 | 1.1089 | 0.0238 | 2.3841   | 0.0171  |
| fetal oxygen deprivation      | 1.1836    | 0.9271 | 1.5110 | 0.1246 | 1.3528   | 0.1760  |
| pregnancy oedema              | 1.2449    | 1.1438 | 1.3549 | 0.0432 | 5.0713   | <0.0001 |
| apgar5 score                  | 1.1617    | 1.1055 | 1.2206 | 0.0252 | 5.9314   | <0.0001 |
| birth weight                  | 1.0355    | 1.0227 | 1.0484 | 0.0063 | 5.5061   | <0.0001 |
| preexisting hypertension      | 1.0762    | 0.7946 | 1.4576 | 0.1547 | 0.4747   | 0.6349  |
| preexisting diabetes          | 1.5062    | 1.2786 | 1.7743 | 0.0835 | 4.9005   | <0.0001 |
| previous induced abortion     | 1.0243    | 0.9923 | 1.0573 | 0.0161 | 1.4831   | 0.1380  |
| previous spontaneous abortion | 1.0555    | 1.0203 | 1.0919 | 0.0173 | 3.1207   | 0.0018  |
| education level               | 0.8463    | 0.8344 | 0.8585 | 0.0072 | -22.9296 | <0.0001 |
| parental income               | 0.8855    | 0.8720 | 0.8992 | 0.0078 | -15.5256 | <0.0001 |
| country                       | 0.8490    | 0.7998 | 0.9011 | 0.0304 | -5.3800  | <0.0001 |
| region Sjælland               | 1.2465    | 1.2004 | 1.2943 | 0.0192 | 11.4728  | <0.0001 |
| region Syddanmark             | 1.1640    | 1.1250 | 1.2043 | 0.0173 | 8.7420   | <0.0001 |
| region Midtjylland            | 0.8216    | 0.7918 | 0.8525 | 0.0188 | -10.4284 | <0.0001 |
| region Nordjylland            | 0.8624    | 0.8237 | 0.9030 | 0.0234 | -6.3035  | <0.0001 |
| mother with disorder          | 1.6553    | 1.6079 | 1.7042 | 0.0148 | 33.9806  | <0.0001 |
| father with disorder          | 1.5066    | 1.4560 | 1.5590 | 0.0174 | 23.5112  | <0.0001 |



| 19. Endocrine - obesity       | exp(coef) | LCL    | UCL    | SE     | Z        | Pr(Z)   |
|-------------------------------|-----------|--------|--------|--------|----------|---------|
|                               | surgery   | 1.4035 | 1.2319 | 1.5991 | 0.0665   | 5.0951  |
| paternal age                  | 0.9270    | 0.9086 | 0.9458 | 0.0102 | -7.4072  | <0.0001 |
| maternal age                  | 0.8194    | 0.8004 | 0.8390 | 0.0120 | -16.5699 | <0.0001 |
| gestation length              | 1.0024    | 0.9858 | 1.0194 | 0.0085 | 0.2923   | 0.7700  |
| maternal bleeding             | 1.0644    | 1.0037 | 1.1288 | 0.0299 | 2.0841   | 0.0371  |
| fetal oxygen deprivation      | 1.2060    | 0.8899 | 1.6342 | 0.1550 | 1.2082   | 0.2269  |
| pregnancy oedema              | 1.2866    | 1.1650 | 1.4208 | 0.0506 | 4.9785   | <0.0001 |
| apgar5 score                  | 1.1963    | 1.1250 | 1.2722 | 0.0313 | 5.7189   | <0.0001 |
| birth weight                  | 1.0746    | 1.0579 | 1.0915 | 0.0079 | 9.0279   | <0.0001 |
| preexisting hypertension      | 1.1458    | 0.7950 | 1.6514 | 0.1864 | 0.7301   | 0.4653  |
| preexisting diabetes          | 1.6444    | 1.3380 | 2.0208 | 0.1051 | 4.7290   | <0.0001 |
| previous induced abortion     | 1.0238    | 0.9836 | 1.0657 | 0.0204 | 1.1539   | 0.2485  |
| previous spontaneous abortion | 1.0756    | 1.0303 | 1.1229 | 0.0219 | 3.3230   | 0.0008  |
| education level               | 0.7634    | 0.7497 | 0.7774 | 0.0092 | -29.1082 | <0.0001 |
| parental income               | 0.8561    | 0.8396 | 0.8728 | 0.0099 | -15.6876 | <0.0001 |
| country                       | 0.6092    | 0.5615 | 0.6610 | 0.0416 | -11.9058 | <0.0001 |
| region Sjælland               | 1.4771    | 1.4096 | 1.5479 | 0.0238 | 16.3335  | <0.0001 |
| region Syddanmark             | 1.2958    | 1.2408 | 1.3533 | 0.0221 | 11.7073  | <0.0001 |
| region Midtjylland            | 0.7949    | 0.7571 | 0.8346 | 0.0248 | -9.2347  | <0.0001 |
| region Nordjylland            | 0.8510    | 0.8016 | 0.9035 | 0.0305 | -5.2858  | <0.0001 |
| mother with disorder          | 2.3414    | 2.2320 | 2.4561 | 0.0244 | 34.8526  | <0.0001 |
| father with disorder          | 1.9915    | 1.8490 | 2.1450 | 0.0378 | 18.1910  | <0.0001 |

| 20. Genitourinary - all       | exp(coef) | LCL    | UCL    | SE     | Z        | Pr(Z)   |
|-------------------------------|-----------|--------|--------|--------|----------|---------|
|                               | surgery   | 1.2709 | 1.1337 | 1.4247 | 0.0582   | 4.1132  |
| paternal age                  | 0.9697    | 0.9533 | 0.9863 | 0.0086 | -3.5479  | 0.0003  |
| maternal age                  | 0.8892    | 0.8718 | 0.9070 | 0.0101 | -11.6181 | <0.0001 |
| gestation length              | 0.9799    | 0.9663 | 0.9936 | 0.0071 | -2.8492  | 0.0043  |
| maternal bleeding             | 1.1145    | 1.0631 | 1.1685 | 0.0241 | 4.4969   | <0.0001 |
| fetal oxygen deprivation      | 0.8451    | 0.6143 | 1.1625 | 0.1627 | -1.0340  | 0.3010  |
| pregnancy oedema              | 1.1302    | 1.0190 | 1.2536 | 0.0528 | 2.3175   | 0.0204  |
| apgar5 score                  | 1.0438    | 0.9888 | 1.1018 | 0.0275 | 1.5549   | 0.1199  |
| birth weight                  | 0.9574    | 0.9449 | 0.9701 | 0.0067 | -6.4757  | <0.0001 |
| preexisting hypertension      | 1.1551    | 0.8466 | 1.5760 | 0.1585 | 0.9100   | 0.3627  |
| preexisting diabetes          | 1.2174    | 0.9851 | 1.5046 | 0.1080 | 1.8214   | 0.0685  |
| previous induced abortion     | 1.1254    | 1.0902 | 1.1618 | 0.0162 | 7.2793   | <0.0001 |
| previous spontaneous abortion | 1.0422    | 1.0058 | 1.0799 | 0.0181 | 2.2808   | 0.0225  |
| education level               | 0.9231    | 0.9093 | 0.9370 | 0.0076 | -10.4461 | <0.0001 |
| parental income               | 0.9278    | 0.9131 | 0.9426 | 0.0081 | -9.2417  | <0.0001 |
| country                       | 0.8833    | 0.8307 | 0.9392 | 0.0313 | -3.9592  | <0.0001 |
| region Sjælland               | 0.7105    | 0.6824 | 0.7397 | 0.0205 | -16.6272 | <0.0001 |
| region Syddanmark             | 0.6690    | 0.6456 | 0.6931 | 0.0181 | -22.1925 | <0.0001 |
| region Midtjylland            | 0.6222    | 0.6002 | 0.6451 | 0.0183 | -25.8170 | <0.0001 |
| region Nordjylland            | 0.6236    | 0.5952 | 0.6535 | 0.0238 | -19.8144 | <0.0001 |
| mother with disorder          | 1.3189    | 1.2766 | 1.3625 | 0.0166 | 16.6573  | <0.0001 |
| father with disorder          | 1.2736    | 1.2166 | 1.3332 | 0.0233 | 10.3625  | <0.0001 |

| <b>21. Genitourinary - kidney infection</b> | <b>exp(coef)</b> | <b>LCL</b> | <b>UCL</b> | <b>SE</b> | <b>Z</b> | <b>Pr(Z)</b> |
|---------------------------------------------|------------------|------------|------------|-----------|----------|--------------|
| surgery                                     | 1.2889           | 0.9632     | 1.7245     | 0.1485    | 1.7081   | 0.0876       |
| paternal age                                | 0.9999           | 0.9577     | 1.0440     | 0.0220    | -0.0006  | 0.9994       |
| maternal age                                | 0.8507           | 0.8087     | 0.8949     | 0.0258    | -6.2576  | <0.0001      |
| gestation length                            | 1.0171           | 0.9818     | 1.0536     | 0.0180    | 0.9419   | 0.3462       |
| maternal bleeding                           | 1.1192           | 0.9922     | 1.2624     | 0.0614    | 1.8329   | 0.0668       |
| fetal oxygen deprivation                    | 0.9303           | 0.4169     | 2.0760     | 0.4095    | -0.1762  | 0.8601       |
| pregnancy oedema                            | 0.8642           | 0.6320     | 1.1817     | 0.1596    | -0.9138  | 0.3608       |
| apgar5 score                                | 1.1312           | 0.9897     | 1.2930     | 0.0681    | 1.8086   | 0.0705       |
| birth weight                                | 0.9892           | 0.9568     | 1.0227     | 0.0169    | -0.6345  | 0.5257       |
| preexisting hypertension                    | 0.5301           | 0.1707     | 1.6463     | 0.5780    | -1.0975  | 0.2723       |
| preexisting diabetes                        | 1.4537           | 0.8995     | 2.3495     | 0.2449    | 1.5275   | 0.1266       |
| previous induced abortion                   | 1.1812           | 1.0914     | 1.2784     | 0.0403    | 4.1275   | <0.0001      |
| previous spontaneous abortion               | 1.1176           | 1.0237     | 1.2200     | 0.0447    | 2.4839   | 0.0129       |
| education level                             | 0.9277           | 0.8927     | 0.9640     | 0.0196    | -3.8268  | 0.0001       |
| parental income                             | 0.9574           | 0.9193     | 0.9970     | 0.0207    | -2.1015  | 0.0355       |
| country                                     | 0.6379           | 0.5350     | 0.7606     | 0.0897    | -5.0086  | <0.0001      |
| region Sjælland                             | 0.6935           | 0.6261     | 0.7682     | 0.0521    | -7.0134  | <0.0001      |
| region Syddanmark                           | 0.6344           | 0.5792     | 0.6948     | 0.0464    | -9.7977  | <0.0001      |
| region Midtjylland                          | 0.6425           | 0.5872     | 0.7029     | 0.0458    | -9.6443  | <0.0001      |
| region Nordjylland                          | 0.6320           | 0.5623     | 0.7103     | 0.0595    | -7.7004  | <0.0001      |
| mother with disorder                        | 1.4632           | 1.1728     | 1.8256     | 0.1128    | 3.3724   | 0.0007       |
| father with disorder                        | 1.6448           | 1.0705     | 2.5272     | 0.2191    | 2.2711   | 0.0231       |

| <b>22. Musculoskeletal - all</b> | <b>exp(coef)</b> | <b>LCL</b> | <b>UCL</b> | <b>SE</b> | <b>Z</b> | <b>Pr(Z)</b> |
|----------------------------------|------------------|------------|------------|-----------|----------|--------------|
| surgery                          | 1.2185           | 1.1547     | 1.2857     | 0.0274    | 7.2069   | <0.0001      |
| paternal age                     | 0.9737           | 0.9658     | 0.9818     | 0.0041    | -6.3389  | <0.0001      |
| maternal age                     | 0.9359           | 0.9271     | 0.9448     | 0.0048    | -13.7206 | <0.0001      |
| gestation length                 | 1.0001           | 0.9936     | 1.0066     | 0.0033    | 0.0409   | 0.9673       |
| maternal bleeding                | 1.0874           | 1.0631     | 1.1123     | 0.0115    | 7.2734   | <0.0001      |
| fetal oxygen deprivation         | 1.1597           | 1.0294     | 1.3065     | 0.0608    | 2.4375   | 0.0147       |
| pregnancy oedema                 | 1.0978           | 1.0429     | 1.1556     | 0.0261    | 3.5663   | 0.0003       |
| apgar5 score                     | 1.0158           | 0.9904     | 1.0420     | 0.0129    | 1.2170   | 0.2235       |
| birth weight                     | 0.9904           | 0.9843     | 0.9965     | 0.0031    | -3.0694  | 0.0021       |
| preexisting hypertension         | 1.0329           | 0.8856     | 1.2047     | 0.0784    | 0.4131   | 0.6795       |
| preexisting diabetes             | 1.0178           | 0.9154     | 1.1317     | 0.0541    | 0.3275   | 0.7432       |
| previous induced abortion        | 1.0467           | 1.0307     | 1.0629     | 0.0078    | 5.8128   | <0.0001      |
| previous spontaneous abortion    | 1.0317           | 1.0146     | 1.0491     | 0.0085    | 3.6718   | 0.0002       |
| education level                  | 0.9555           | 0.9487     | 0.9624     | 0.0036    | -12.4498 | <0.0001      |
| parental income                  | 0.9929           | 0.9853     | 1.0005     | 0.0039    | -1.8176  | 0.0691       |
| country                          | 0.8543           | 0.8275     | 0.8819     | 0.0162    | -9.7021  | <0.0001      |
| region Sjælland                  | 0.8484           | 0.8315     | 0.8657     | 0.0102    | -15.9992 | <0.0001      |
| region Syddanmark                | 0.8867           | 0.8716     | 0.9022     | 0.0088    | -13.6500 | <0.0001      |
| region Midtjylland               | 1.0416           | 1.0246     | 1.0589     | 0.0084    | 4.8541   | <0.0001      |
| region Nordjylland               | 0.8347           | 0.8163     | 0.8536     | 0.0113    | -15.8763 | <0.0001      |
| mother with disorder             | 1.3431           | 1.3268     | 1.3597     | 0.0062    | 47.3507  | <0.0001      |
| father with disorder             | 1.2313           | 1.2162     | 1.2466     | 0.0062    | 33.0863  | <0.0001      |

| 23. Neoplasms - all           | exp(coef) | LCL    | UCL    | SE     | Z       | Pr(Z)   |
|-------------------------------|-----------|--------|--------|--------|---------|---------|
|                               | surgery   | 1.2211 | 1.0966 | 1.3598 | 0.0548  | 3.6415  |
| paternal age                  | 0.9855    | 0.9697 | 1.0016 | 0.0082 | -1.7577 | 0.0787  |
| maternal age                  | 0.9694    | 0.9516 | 0.9874 | 0.0094 | -3.2962 | 0.0009  |
| gestation length              | 0.9982    | 0.9855 | 1.0110 | 0.0065 | -0.2716 | 0.7859  |
| maternal bleeding             | 1.0751    | 1.0282 | 1.1240 | 0.0227 | 3.1877  | 0.0014  |
| fetal oxygen deprivation      | 1.1286    | 0.8935 | 1.4256 | 0.1191 | 1.0154  | 0.3098  |
| pregnancy oedema              | 0.9849    | 0.8908 | 1.0890 | 0.0512 | -0.2953 | 0.7677  |
| apgar5 score                  | 0.9769    | 0.9287 | 1.0277 | 0.0258 | -0.9003 | 0.3679  |
| birth weight                  | 1.0171    | 1.0049 | 1.0293 | 0.0061 | 2.7748  | 0.0055  |
| preexisting hypertension      | 0.9508    | 0.6914 | 1.3074 | 0.1625 | -0.3103 | 0.7562  |
| preexisting diabetes          | 1.0287    | 0.8326 | 1.2709 | 0.1078 | 0.2623  | 0.7930  |
| previous induced abortion     | 0.9953    | 0.9652 | 1.0262 | 0.0156 | -0.3011 | 0.7632  |
| previous spontaneous abortion | 1.0262    | 0.9934 | 1.0601 | 0.0165 | 1.5623  | 0.1182  |
| education level               | 1.0071    | 0.9932 | 1.0212 | 0.0070 | 1.0080  | 0.3134  |
| parental income               | 1.0281    | 1.0130 | 1.0434 | 0.0075 | 3.6791  | 0.0002  |
| country                       | 0.9152    | 0.8554 | 0.9792 | 0.0344 | -2.5675 | 0.0102  |
| region Sjælland               | 1.1109    | 1.0693 | 1.1542 | 0.0194 | 5.4004  | <0.0001 |
| region Syddanmark             | 1.1857    | 1.1468 | 1.2259 | 0.0170 | 10.0164 | <0.0001 |
| region Midtjylland            | 1.1391    | 1.1018 | 1.1777 | 0.0169 | 7.6675  | <0.0001 |
| region Nordjylland            | 0.9369    | 0.8963 | 0.9793 | 0.0225 | -2.8842 | 0.0039  |
| mother with disorder          | 1.1890    | 1.1599 | 1.2188 | 0.0126 | 13.7133 | <0.0001 |
| father with disorder          | 1.1534    | 1.1158 | 1.1923 | 0.0169 | 8.4357  | <0.0001 |

| 24. Neoplasms - benign        | exp(coef) | LCL    | UCL    | SE     | Z       | Pr(Z)   |
|-------------------------------|-----------|--------|--------|--------|---------|---------|
|                               | surgery   | 1.2251 | 1.0916 | 1.3749 | 0.0588  | 3.4504  |
| paternal age                  | 0.9803    | 0.9633 | 0.9975 | 0.0089 | -2.2307 | 0.0257  |
| maternal age                  | 0.9763    | 0.9571 | 0.9960 | 0.0101 | -2.3535 | 0.0185  |
| gestation length              | 0.9963    | 0.9827 | 1.0101 | 0.0070 | -0.5236 | 0.6004  |
| maternal bleeding             | 1.0647    | 1.0148 | 1.1171 | 0.0245 | 2.5610  | 0.0104  |
| fetal oxygen deprivation      | 1.1699    | 0.9111 | 1.5022 | 0.1275 | 1.2306  | 0.2184  |
| pregnancy oedema              | 0.9981    | 0.8950 | 1.1131 | 0.0556 | -0.0331 | 0.9735  |
| apgar5 score                  | 0.9698    | 0.9183 | 1.0242 | 0.0278 | -1.0993 | 0.2715  |
| birth weight                  | 1.0140    | 1.0010 | 1.0272 | 0.0065 | 2.1216  | 0.0338  |
| preexisting hypertension      | 0.8833    | 0.6208 | 1.2567 | 0.1799 | -0.6896 | 0.4903  |
| preexisting diabetes          | 1.0415    | 0.8318 | 1.3040 | 0.1146 | 0.3548  | 0.7226  |
| previous induced abortion     | 1.0013    | 0.9690 | 1.0348 | 0.0167 | 0.0814  | 0.9350  |
| previous spontaneous abortion | 1.0474    | 1.0117 | 1.0845 | 0.0177 | 2.6187  | 0.0088  |
| education level               | 1.0126    | 0.9975 | 1.0279 | 0.0076 | 1.6439  | 0.1001  |
| parental income               | 1.0253    | 1.0091 | 1.0418 | 0.0081 | 3.0778  | 0.0020  |
| country                       | 0.9220    | 0.8580 | 0.9907 | 0.0366 | -2.2124 | 0.0269  |
| region Sjælland               | 1.0985    | 1.0541 | 1.1448 | 0.0210 | 4.4670  | <0.0001 |
| region Syddanmark             | 1.1979    | 1.1557 | 1.2416 | 0.0182 | 9.8824  | <0.0001 |
| region Midtjylland            | 1.1487    | 1.1083 | 1.1905 | 0.0182 | 7.5940  | <0.0001 |
| region Nordjylland            | 0.8990    | 0.8566 | 0.9436 | 0.0246 | -4.3137 | <0.0001 |
| mother with disorder          | 1.2202    | 1.1852 | 1.2562 | 0.0148 | 13.4010 | <0.0001 |
| father with disorder          | 1.1921    | 1.1412 | 1.2452 | 0.0222 | 7.9035  | <0.0001 |

| 25. Circulatory - all         | exp(coef) | LCL    | UCL    | SE     | Z       | Pr(Z)   |
|-------------------------------|-----------|--------|--------|--------|---------|---------|
|                               | surgery   | 1.1715 | 0.9997 | 1.3729 | 0.0809  | 1.9565  |
| paternal age                  | 0.9688    | 0.9459 | 0.9922 | 0.0121 | -2.5997 | 0.0093  |
| maternal age                  | 0.9481    | 0.9227 | 0.9743 | 0.0138 | -3.8377 | 0.0001  |
| gestation length              | 0.9712    | 0.9530 | 0.9898 | 0.0096 | -3.0116 | 0.0025  |
| maternal bleeding             | 1.1373    | 1.0670 | 1.2122 | 0.0325 | 3.9549  | <0.0001 |
| fetal oxygen deprivation      | 0.8505    | 0.5782 | 1.2508 | 0.1968 | -0.8226 | 0.4107  |
| pregnancy oedema              | 1.0466    | 0.9091 | 1.2048 | 0.0718 | 0.6341  | 0.5259  |
| apgar5 score                  | 1.2291    | 1.1481 | 1.3158 | 0.0347 | 5.9292  | <0.0001 |
| birth weight                  | 0.9757    | 0.9585 | 0.9932 | 0.0090 | -2.7033 | 0.0068  |
| preexisting hypertension      | 1.1880    | 0.8233 | 1.7141 | 0.1870 | 0.9209  | 0.3570  |
| preexisting diabetes          | 0.9621    | 0.7068 | 1.3096 | 0.1573 | -0.2454 | 0.8061  |
| previous induced abortion     | 0.9862    | 0.9422 | 1.0323 | 0.0232 | -0.5927 | 0.5533  |
| previous spontaneous abortion | 1.0432    | 0.9940 | 1.0949 | 0.0246 | 1.7173  | 0.0859  |
| education level               | 0.9706    | 0.9508 | 0.9908 | 0.0105 | -2.8323 | 0.0046  |
| parental income               | 0.9825    | 0.9613 | 1.0042 | 0.0111 | -1.5761 | 0.1149  |
| country                       | 0.8854    | 0.8052 | 0.9735 | 0.0484 | -2.5134 | 0.0119  |
| region Sjælland               | 0.9937    | 0.9405 | 1.0500 | 0.0280 | -0.2215 | 0.8246  |
| region Syddanmark             | 0.9101    | 0.8661 | 0.9564 | 0.0253 | -3.7177 | 0.0002  |
| region Midtjylland            | 0.9468    | 0.9018 | 0.9941 | 0.0248 | -2.1940 | 0.0282  |
| region Nordjylland            | 0.7628    | 0.7138 | 0.8151 | 0.0338 | -8.0004 | <0.0001 |
| mother with disorder          | 1.4985    | 1.4338 | 1.5661 | 0.0225 | 17.9650 | <0.0001 |
| father with disorder          | 1.3353    | 1.2811 | 1.3917 | 0.0211 | 13.6985 | <0.0001 |

| 26. Nervous System - all      | exp(coef) | LCL    | UCL    | SE     | Z       | Pr(Z)   |
|-------------------------------|-----------|--------|--------|--------|---------|---------|
|                               | surgery   | 1.5085 | 1.2620 | 1.8031 | 0.0910  | 4.5166  |
| paternal age                  | 0.9776    | 0.9490 | 1.0070 | 0.0151 | -1.4953 | 0.1348  |
| maternal age                  | 0.8889    | 0.8588 | 0.9199 | 0.0175 | -6.7135 | <0.0001 |
| gestation length              | 0.9955    | 0.9718 | 1.0198 | 0.0122 | -0.3622 | 0.7171  |
| maternal bleeding             | 1.1232    | 1.0352 | 1.2187 | 0.0416 | 2.7909  | 0.0052  |
| fetal oxygen deprivation      | 1.5467    | 1.0724 | 2.2309 | 0.1868 | 2.3341  | 0.0195  |
| pregnancy oedema              | 1.2077    | 1.0301 | 1.4159 | 0.0811 | 2.3256  | 0.0200  |
| apgar5 score                  | 1.0712    | 0.9767 | 1.1750 | 0.0471 | 1.4605  | 0.1441  |
| birth weight                  | 0.9770    | 0.9553 | 0.9992 | 0.0114 | -2.0268 | 0.0426  |
| preexisting hypertension      | 1.1102    | 0.6296 | 1.9575 | 0.2893 | 0.3614  | 0.7177  |
| preexisting diabetes          | 1.4977    | 1.0718 | 2.0927 | 0.1706 | 2.3665  | 0.0179  |
| previous induced abortion     | 1.0604    | 1.0018 | 1.1224 | 0.0289 | 2.0252  | 0.0428  |
| previous spontaneous abortion | 1.0826    | 1.0191 | 1.1501 | 0.0308 | 2.5730  | 0.0100  |
| education level               | 0.9062    | 0.8830 | 0.9301 | 0.0132 | -7.4335 | <0.0001 |
| parental income               | 0.9368    | 0.9112 | 0.9631 | 0.0141 | -4.6145 | <0.0001 |
| country                       | 0.7051    | 0.6197 | 0.8023 | 0.0658 | -5.3038 | <0.0001 |
| region Sjælland               | 1.4341    | 1.3411 | 1.5336 | 0.0342 | 10.5360 | <0.0001 |
| region Syddanmark             | 1.1590    | 1.0880 | 1.2345 | 0.0322 | 4.5797  | <0.0001 |
| region Midtjylland            | 0.9868    | 0.9245 | 1.0534 | 0.0333 | -0.3968 | 0.6914  |
| region Nordjylland            | 0.7523    | 0.6877 | 0.8229 | 0.0457 | -6.2153 | <0.0001 |
| mother with disorder          | 1.5647    | 1.4591 | 1.6780 | 0.0356 | 12.5576 | <0.0001 |
| father with disorder          | 1.4133    | 1.2973 | 1.5397 | 0.0437 | 7.9168  | <0.0001 |

| 27. Eye/adnexa - all          | exp(coef) | LCL    | UCL    | SE     | Z        | Pr(Z)   |
|-------------------------------|-----------|--------|--------|--------|----------|---------|
|                               | surgery   | 1.2531 | 1.1274 | 1.3928 | 0.0539   | 4.1857  |
| paternal age                  | 1.0033    | 0.9880 | 1.0189 | 0.0078 | 0.4281   | 0.6685  |
| maternal age                  | 0.9744    | 0.9574 | 0.9917 | 0.0089 | -2.8761  | 0.0040  |
| gestation length              | 0.9570    | 0.9452 | 0.9690 | 0.0063 | -6.9171  | <0.0001 |
| maternal bleeding             | 1.0874    | 1.0419 | 1.1348 | 0.0218 | 3.8421   | 0.0001  |
| fetal oxygen deprivation      | 1.1464    | 0.8947 | 1.4690 | 0.1265 | 1.0804   | 0.2799  |
| pregnancy oedema              | 1.0639    | 0.9643 | 1.1737 | 0.0501 | 1.2363   | 0.2163  |
| apgar5 score                  | 1.0673    | 1.0184 | 1.1185 | 0.0239 | 2.7253   | 0.0064  |
| birth weight                  | 0.9581    | 0.9470 | 0.9694 | 0.0059 | -7.1573  | <0.0001 |
| preexisting hypertension      | 1.0024    | 0.7455 | 1.3478 | 0.1510 | 0.0159   | 0.9872  |
| preexisting diabetes          | 1.0952    | 0.9007 | 1.3318 | 0.0997 | 0.9122   | 0.3616  |
| previous induced abortion     | 1.0290    | 0.9993 | 1.0596 | 0.0149 | 1.9192   | 0.0549  |
| previous spontaneous abortion | 1.0694    | 1.0364 | 1.1034 | 0.0159 | 4.2025   | <0.0001 |
| education level               | 0.9591    | 0.9463 | 0.9720 | 0.0068 | -6.1012  | <0.0001 |
| parental income               | 0.9569    | 0.9433 | 0.9706 | 0.0072 | -6.0417  | <0.0001 |
| country                       | 1.0354    | 0.9806 | 1.0934 | 0.0277 | 1.2548   | 0.2095  |
| region Sjælland               | 0.7687    | 0.7415 | 0.7969 | 0.0183 | -14.3111 | <0.0001 |
| region Syddanmark             | 0.7515    | 0.7283 | 0.7755 | 0.0160 | -17.8031 | <0.0001 |
| region Midtjylland            | 0.6381    | 0.6176 | 0.6592 | 0.0166 | -26.9935 | <0.0001 |
| region Nordjylland            | 0.6704    | 0.6429 | 0.6991 | 0.0213 | -18.6939 | <0.0001 |
| mother with disorder          | 1.3262    | 1.2781 | 1.3761 | 0.0188 | 14.9739  | <0.0001 |
| father with disorder          | 1.2401    | 1.1941 | 1.2880 | 0.0193 | 11.1484  | <0.0001 |

| 28. Mental - all              | exp(coef) | LCL    | UCL    | SE     | Z        | Pr(Z)   |
|-------------------------------|-----------|--------|--------|--------|----------|---------|
|                               | surgery   | 1.2229 | 1.1295 | 1.3239 | 0.0405   | 4.9665  |
| paternal age                  | 1.0143    | 1.0026 | 1.0261 | 0.0059 | 2.4050   | 0.0161  |
| maternal age                  | 0.9173    | 0.9050 | 0.9299 | 0.0069 | -12.4658 | <0.0001 |
| gestation length              | 0.9821    | 0.9726 | 0.9917 | 0.0049 | -3.6345  | 0.0002  |
| maternal bleeding             | 1.1313    | 1.0953 | 1.1684 | 0.0164 | 7.4817   | <0.0001 |
| fetal oxygen deprivation      | 1.2019    | 0.9971 | 1.4489 | 0.0953 | 1.9300   | 0.0535  |
| pregnancy oedema              | 1.0852    | 1.0062 | 1.1705 | 0.0385 | 2.1203   | 0.0339  |
| apgar5 score                  | 1.0591    | 1.0206 | 1.0990 | 0.0188 | 3.0447   | 0.0023  |
| birth weight                  | 0.9710    | 0.9621 | 0.9799 | 0.0046 | -6.2740  | <0.0001 |
| preexisting hypertension      | 1.1793    | 0.9504 | 1.4633 | 0.1101 | 1.4980   | 0.1341  |
| preexisting diabetes          | 1.1352    | 0.9809 | 1.3138 | 0.0745 | 1.7015   | 0.0888  |
| previous induced abortion     | 1.1292    | 1.1047 | 1.1543 | 0.0112 | 10.8523  | <0.0001 |
| previous spontaneous abortion | 1.0692    | 1.0432 | 1.0958 | 0.0125 | 5.3334   | <0.0001 |
| education level               | 0.9600    | 0.9497 | 0.9703 | 0.0054 | -7.4523  | <0.0001 |
| parental income               | 0.7864    | 0.7774 | 0.7955 | 0.0058 | -40.8631 | <0.0001 |
| country                       | 0.4841    | 0.4590 | 0.5105 | 0.0271 | -26.7619 | <0.0001 |
| region Sjælland               | 0.8414    | 0.8177 | 0.8657 | 0.0145 | -11.8655 | <0.0001 |
| region Syddanmark             | 0.9152    | 0.8933 | 0.9377 | 0.0123 | -7.1517  | <0.0001 |
| region Midtjylland            | 0.7653    | 0.7460 | 0.7851 | 0.0130 | -20.5091 | <0.0001 |
| region Nordjylland            | 0.5591    | 0.5389 | 0.5801 | 0.0187 | -30.9937 | <0.0001 |
| mother with disorder          | 2.0420    | 1.9934 | 2.0917 | 0.0122 | 58.0955  | <0.0001 |
| father with disorder          | 1.6294    | 1.5836 | 1.6765 | 0.0145 | 33.5810  | <0.0001 |

**Table S6 - Full Cox regression outputs - impact of adenoidectomy on risk of later disease.**

| <b>1. Infectious/parasitic - all</b> | <b>exp(coef)</b> | <b>LCL</b> | <b>UCL</b> | <b>SE</b> | <b>Z</b> | <b>Pr(Z)</b> |
|--------------------------------------|------------------|------------|------------|-----------|----------|--------------|
| surgery                              | 1.2751           | 1.1931     | 1.3627     | 0.0339    | 7.1651   | <0.0001      |
| paternal age                         | 0.9933           | 0.9796     | 1.0072     | 0.0070    | -0.9405  | 0.3469       |
| maternal age                         | 0.9731           | 0.9578     | 0.9887     | 0.0081    | -3.3560  | 0.0007       |
| gestation length                     | 0.9878           | 0.9768     | 0.9989     | 0.0057    | -2.1485  | 0.0316       |
| maternal bleeding                    | 1.1079           | 1.0661     | 1.1513     | 0.0196    | 5.2296   | <0.0001      |
| fetal oxygen deprivation             | 0.8918           | 0.6948     | 1.1448     | 0.1273    | -0.8980  | 0.3691       |
| pregnancy oedema                     | 1.0579           | 0.9673     | 1.1570     | 0.0456    | 1.2333   | 0.2174       |
| apgar5 score                         | 1.0433           | 0.9994     | 1.0892     | 0.0219    | 1.9343   | 0.0530       |
| birth weight                         | 0.9913           | 0.9810     | 1.0018     | 0.0053    | -1.6162  | 0.1060       |
| preexisting hypertension             | 1.0357           | 0.7966     | 1.3465     | 0.1338    | 0.2625   | 0.7929       |
| preexisting diabetes                 | 1.0546           | 0.8814     | 1.2618     | 0.0915    | 0.5809   | 0.5612       |
| previous induced abortion            | 1.0931           | 1.0654     | 1.1216     | 0.0131    | 6.7951   | <0.0001      |
| previous spontaneous abortion        | 1.0461           | 1.0171     | 1.0760     | 0.0143    | 3.1438   | 0.0016       |
| education level                      | 0.9923           | 0.9805     | 1.0043     | 0.0061    | -1.2552  | 0.2093       |
| parental income                      | 0.9864           | 0.9739     | 0.9991     | 0.0065    | -2.0943  | 0.0362       |
| country                              | 1.2691           | 1.2104     | 1.3306     | 0.0241    | 9.8712   | <0.0001      |
| region Sjælland                      | 0.7845           | 0.7599     | 0.8099     | 0.0162    | -14.9030 | <0.0001      |
| region Syddanmark                    | 0.6846           | 0.6651     | 0.7046     | 0.0147    | -25.7642 | <0.0001      |
| region Midtjylland                   | 0.7020           | 0.6824     | 0.7223     | 0.0144    | -24.4181 | <0.0001      |
| region Nordjylland                   | 0.6156           | 0.5923     | 0.6399     | 0.0196    | -24.6213 | <0.0001      |
| mother with disorder                 | 1.3780           | 1.3346     | 1.4229     | 0.0163    | 19.6287  | <0.0001      |
| father with disorder                 | 1.2447           | 1.2036     | 1.2873     | 0.0171    | 12.7714  | <0.0001      |

| <b>2. Allergic - all</b>      | <b>exp(coef)</b> | <b>LCL</b> | <b>UCL</b> | <b>SE</b> | <b>Z</b> | <b>Pr(Z)</b> |
|-------------------------------|------------------|------------|------------|-----------|----------|--------------|
| surgery                       | 1.3799           | 1.2562     | 1.5159     | 0.0479    | 6.7173   | <0.0001      |
| paternal age                  | 1.0061           | 0.9857     | 1.0269     | 0.0104    | 0.5832   | 0.5597       |
| maternal age                  | 1.0268           | 1.0032     | 1.0511     | 0.0118    | 2.2304   | 0.0257       |
| gestation length              | 0.9972           | 0.9812     | 1.0134     | 0.0082    | -0.3397  | 0.7340       |
| maternal bleeding             | 1.1426           | 1.0816     | 1.2070     | 0.0279    | 4.7651   | <0.0001      |
| fetal oxygen deprivation      | 0.6034           | 0.3845     | 0.9468     | 0.2298    | -2.1975  | 0.0279       |
| pregnancy oedema              | 1.2391           | 1.0974     | 1.3990     | 0.0619    | 3.4611   | 0.0005       |
| apgar5 score                  | 1.0825           | 1.0193     | 1.1495     | 0.0306    | 2.5846   | 0.0097       |
| birth weight                  | 0.9780           | 0.9632     | 0.9931     | 0.0078    | -2.8362  | 0.0045       |
| preexisting hypertension      | 0.7289           | 0.4646     | 1.1435     | 0.2297    | -1.3763  | 0.1687       |
| preexisting diabetes          | 1.0399           | 0.7932     | 1.3634     | 0.1381    | 0.2834   | 0.7768       |
| previous induced abortion     | 1.0402           | 1.0012     | 1.0808     | 0.0195    | 2.0242   | 0.0429       |
| previous spontaneous abortion | 1.0433           | 1.0012     | 1.0872     | 0.0210    | 2.0175   | 0.0436       |
| education level               | 1.0654           | 1.0467     | 1.0844     | 0.0090    | 7.0149   | <0.0001      |
| parental income               | 1.0196           | 1.0006     | 1.0389     | 0.0095    | 2.0307   | 0.0422       |
| country                       | 1.3856           | 1.2911     | 1.4871     | 0.0360    | 9.0506   | <0.0001      |
| region Sjælland               | 0.7125           | 0.6772     | 0.7497     | 0.0259    | -13.0736 | <0.0001      |
| region Syddanmark             | 1.0327           | 0.9923     | 1.0747     | 0.0203    | 1.5842   | 0.1131       |
| region Midtjylland            | 0.7876           | 0.7550     | 0.8217     | 0.0216    | -11.0424 | <0.0001      |
| region Nordjylland            | 0.7121           | 0.6726     | 0.7540     | 0.0291    | -11.6537 | <0.0001      |
| mother with disorder          | 1.8645           | 1.7454     | 1.9918     | 0.0336    | 18.5010  | <0.0001      |
| father with disorder          | 1.7644           | 1.6250     | 1.9158     | 0.0420    | 13.5176  | <0.0001      |

| 3. Allergic - rhinitis        | exp(coef) | LCL    | UCL    | SE     | Z       | Pr(Z)   |
|-------------------------------|-----------|--------|--------|--------|---------|---------|
|                               | surgery   | 1.6148 | 1.4252 | 1.8296 | 0.0637  | 7.5203  |
| paternal age                  | 1.0191    | 0.9898 | 1.0492 | 0.0148 | 1.2732  | 0.2029  |
| maternal age                  | 1.0643    | 1.0297 | 1.1001 | 0.0168 | 3.6957  | 0.0002  |
| gestation length              | 0.9994    | 0.9771 | 1.0222 | 0.0115 | -0.0517 | 0.9587  |
| maternal bleeding             | 1.0643    | 0.9828 | 1.1526 | 0.0406 | 1.5342  | 0.1249  |
| fetal oxygen deprivation      | 0.5550    | 0.2884 | 1.0680 | 0.3339 | -1.7629 | 0.0779  |
| pregnancy oedema              | 1.1629    | 0.9751 | 1.3870 | 0.0899 | 1.6795  | 0.0930  |
| apgar5 score                  | 1.0914    | 1.0044 | 1.1860 | 0.0423 | 2.0647  | 0.0389  |
| birth weight                  | 0.9888    | 0.9678 | 1.0103 | 0.0109 | -1.0195 | 0.3079  |
| preexisting hypertension      | 0.6024    | 0.3010 | 1.2056 | 0.3539 | -1.4315 | 0.1522  |
| preexisting diabetes          | 0.7667    | 0.4937 | 1.1908 | 0.2246 | -1.1823 | 0.2370  |
| previous induced abortion     | 1.0042    | 0.9505 | 1.0610 | 0.0280 | 0.1525  | 0.8787  |
| previous spontaneous abortion | 1.0328    | 0.9744 | 1.0947 | 0.0297 | 1.0883  | 0.2764  |
| education level               | 1.1294    | 1.1012 | 1.1582 | 0.0128 | 9.4599  | <0.0001 |
| parental income               | 1.0258    | 0.9986 | 1.0538 | 0.0137 | 1.8620  | 0.0625  |
| country                       | 1.4185    | 1.2751 | 1.5780 | 0.0543 | 6.4295  | <0.0001 |
| region Sjælland               | 0.9071    | 0.8400 | 0.9795 | 0.0391 | -2.4869 | 0.0128  |
| region Syddanmark             | 1.7590    | 1.6605 | 1.8633 | 0.0293 | 19.2115 | <0.0001 |
| region Midtjylland            | 1.1154    | 1.0473 | 1.1879 | 0.0321 | 3.3992  | 0.0006  |
| region Nordjylland            | 1.2836    | 1.1897 | 1.3849 | 0.0387 | 6.4435  | <0.0001 |
| mother with disorder          | 3.1455    | 2.8026 | 3.5304 | 0.0588 | 19.4586 | <0.0001 |
| father with disorder          | 2.8219    | 2.4535 | 3.2456 | 0.0713 | 14.5365 | <0.0001 |

| 4. Allergic - conjunctivitis  | exp(coef) | LCL    | UCL    | SE       | Z       | Pr(Z)   |
|-------------------------------|-----------|--------|--------|----------|---------|---------|
|                               | surgery   | 1.7514 | 1.3518 | 2.2691   | 0.1321  | 4.2421  |
| paternal age                  | 1.0119    | 0.9514 | 1.0762 | 0.0314   | 0.3770  | 0.7061  |
| maternal age                  | 1.0713    | 0.9990 | 1.1489 | 0.0356   | 1.9319  | 0.0533  |
| gestation length              | 1.0248    | 0.9770 | 1.0749 | 0.0243   | 1.0057  | 0.3145  |
| maternal bleeding             | 1.2086    | 1.0295 | 1.4188 | 0.0818   | 2.3155  | 0.0205  |
| fetal oxygen deprivation      | 0.0000    | 0.0000 | Inf    | 370.1012 | -0.0344 | 0.9724  |
| pregnancy oedema              | 1.4792    | 1.0510 | 2.0818 | 0.1743   | 2.2457  | 0.0247  |
| apgar5 score                  | 1.0437    | 0.8738 | 1.2466 | 0.0906   | 0.4722  | 0.6367  |
| birth weight                  | 1.0132    | 0.9678 | 1.0606 | 0.0233   | 0.5616  | 0.5743  |
| preexisting hypertension      | 0.3226    | 0.0453 | 2.2934 | 1.0006   | -1.1304 | 0.2582  |
| preexisting diabetes          | 1.2298    | 0.5832 | 2.5932 | 0.3806   | 0.5434  | 0.5868  |
| previous induced abortion     | 1.1018    | 0.9837 | 1.2340 | 0.0578   | 1.6766  | 0.0936  |
| previous spontaneous abortion | 1.1712    | 1.0398 | 1.3192 | 0.0607   | 2.6032  | 0.0092  |
| education level               | 1.0673    | 1.0116 | 1.1261 | 0.0273   | 2.3824  | 0.0171  |
| parental income               | 1.0253    | 0.9680 | 1.0860 | 0.0293   | 0.8523  | 0.3940  |
| country                       | 1.5564    | 1.2648 | 1.9152 | 0.1058   | 4.1797  | <0.0001 |
| region Sjælland               | 0.6708    | 0.5653 | 0.7960 | 0.0873   | -4.5727 | <0.0001 |
| region Syddanmark             | 1.8783    | 1.6752 | 2.1060 | 0.0583   | 10.7975 | <0.0001 |
| region Midtjylland            | 0.6978    | 0.6035 | 0.8067 | 0.0740   | -4.8608 | <0.0001 |
| region Nordjylland            | 0.9588    | 0.8091 | 1.1361 | 0.0865   | -0.4857 | 0.6271  |
| mother with disorder          | 1.6499    | 0.7851 | 3.4676 | 0.3789   | 1.3215  | 0.1863  |
| father with disorder          | 2.8925    | 1.3758 | 6.0812 | 0.3791   | 2.8014  | 0.0050  |

| 5. Allergic - eczema/dermatitis | exp(coef) | LCL    | UCL    | SE     | Z        | Pr(Z)   |
|---------------------------------|-----------|--------|--------|--------|----------|---------|
|                                 | surgery   | 1.2997 | 1.0782 | 1.5666 | 0.0953   | 2.7505  |
| paternal age                    | 0.9893    | 0.9515 | 1.0287 | 0.0199 | -0.5354  | 0.5923  |
| maternal age                    | 0.9966    | 0.9531 | 1.0422 | 0.0227 | -0.1455  | 0.8842  |
| gestation length                | 1.0211    | 0.9901 | 1.0531 | 0.0157 | 1.3314   | 0.1830  |
| maternal bleeding               | 1.2056    | 1.0883 | 1.3356 | 0.0522 | 3.5796   | 0.0003  |
| fetal oxygen deprivation        | 0.6818    | 0.3057 | 1.5204 | 0.4091 | -0.9358  | 0.3493  |
| pregnancy oedema                | 1.2988    | 1.0354 | 1.6291 | 0.1156 | 2.2610   | 0.0237  |
| apgar5 score                    | 1.0580    | 0.9411 | 1.1895 | 0.0597 | 0.9446   | 0.3448  |
| birth weight                    | 0.9816    | 0.9534 | 1.0107 | 0.0148 | -1.2429  | 0.2138  |
| preexisting hypertension        | 0.7051    | 0.2931 | 1.6961 | 0.4478 | -0.7801  | 0.4353  |
| preexisting diabetes            | 1.0918    | 0.6561 | 1.8166 | 0.2597 | 0.3381   | 0.7352  |
| previous induced abortion       | 1.0789    | 1.0044 | 1.1590 | 0.0365 | 2.0816   | 0.0373  |
| previous spontaneous abortion   | 1.0723    | 0.9920 | 1.1591 | 0.0397 | 1.7594   | 0.0785  |
| education level                 | 1.0411    | 1.0066 | 1.0768 | 0.0171 | 2.3460   | 0.0189  |
| parental income                 | 1.0582    | 1.0212 | 1.0966 | 0.0181 | 3.1159   | 0.0018  |
| country                         | 1.2608    | 1.0985 | 1.4471 | 0.0703 | 3.2970   | 0.0009  |
| region Sjælland                 | 0.6128    | 0.5559 | 0.6755 | 0.0497 | -9.8518  | <0.0001 |
| region Syddanmark               | 0.9003    | 0.8352 | 0.9704 | 0.0382 | -2.7429  | 0.0060  |
| region Midtjylland              | 0.8009    | 0.7416 | 0.8648 | 0.0391 | -5.6631  | <0.0001 |
| region Nordjylland              | 0.4031    | 0.3538 | 0.4594 | 0.0666 | -13.6332 | <0.0001 |
| mother with disorder            | 2.4876    | 2.0684 | 2.9919 | 0.0941 | 9.6778   | <0.0001 |
| father with disorder            | 2.0043    | 1.5079 | 2.6641 | 0.1451 | 4.7886   | <0.0001 |

| 6. Allergic - urticaria/angiodema | exp(coef) | LCL    | UCL    | SE     | Z        | Pr(Z)   |
|-----------------------------------|-----------|--------|--------|--------|----------|---------|
|                                   | surgery   | 1.2233 | 1.0186 | 1.4691 | 0.0934   | 2.1572  |
| paternal age                      | 1.0063    | 0.9680 | 1.0461 | 0.0197 | 0.3201   | 0.7488  |
| maternal age                      | 0.9894    | 0.9464 | 1.0344 | 0.0226 | -0.4679  | 0.6398  |
| gestation length                  | 0.9903    | 0.9597 | 1.0218 | 0.0160 | -0.6076  | 0.5434  |
| maternal bleeding                 | 1.2773    | 1.1548 | 1.4127 | 0.0514 | 4.7600   | <0.0001 |
| fetal oxygen deprivation          | 0.5341    | 0.2001 | 1.4256 | 0.5008 | -1.2519  | 0.2106  |
| pregnancy oedema                  | 1.5592    | 1.2664 | 1.9197 | 0.1061 | 4.1854   | <0.0001 |
| apgar5 score                      | 1.1153    | 0.9935 | 1.2520 | 0.0589 | 1.8507   | 0.0642  |
| birth weight                      | 0.9683    | 0.9400 | 0.9975 | 0.0151 | -2.1207  | 0.0339  |
| preexisting hypertension          | 0.7246    | 0.3011 | 1.7436 | 0.4480 | -0.7189  | 0.4721  |
| preexisting diabetes              | 1.3165    | 0.8266 | 2.0970 | 0.2374 | 1.1581   | 0.2468  |
| previous induced abortion         | 1.0613    | 0.9869 | 1.1414 | 0.0370 | 1.6055   | 0.1083  |
| previous spontaneous abortion     | 1.0461    | 0.9663 | 1.1325 | 0.0404 | 1.1153   | 0.2647  |
| education level                   | 1.0288    | 0.9947 | 1.0641 | 0.0172 | 1.6529   | 0.0983  |
| parental income                   | 0.9741    | 0.9400 | 1.0094 | 0.0181 | -1.4421  | 0.1492  |
| country                           | 1.4941    | 1.3234 | 1.6868 | 0.0619 | 6.4866   | <0.0001 |
| region Sjælland                   | 0.6060    | 0.5530 | 0.6640 | 0.0466 | -10.7258 | <0.0001 |
| region Syddanmark                 | 0.6497    | 0.6015 | 0.7018 | 0.0393 | -10.9571 | <0.0001 |
| region Midtjylland                | 0.4924    | 0.4528 | 0.5354 | 0.0427 | -16.5806 | <0.0001 |
| region Nordjylland                | 0.3630    | 0.3197 | 0.4121 | 0.0647 | -15.6455 | <0.0001 |
| mother with disorder              | 1.9275    | 1.5848 | 2.3443 | 0.0998 | 6.5704   | <0.0001 |
| father with disorder              | 1.4300    | 1.0818 | 1.8903 | 0.1423 | 2.5128   | 0.0119  |



| 7. Skin - all                 | exp(coef) | LCL    | UCL    | SE     | Z        | Pr(Z)   |
|-------------------------------|-----------|--------|--------|--------|----------|---------|
|                               | surgery   | 1.2386 | 1.1730 | 1.3078 | 0.0277   | 7.7116  |
| paternal age                  | 0.9884    | 0.9769 | 1.0000 | 0.0059 | -1.9541  | 0.0506  |
| maternal age                  | 0.9546    | 0.9418 | 0.9675 | 0.0068 | -6.7703  | <0.0001 |
| gestation length              | 0.9965    | 0.9872 | 1.0059 | 0.0047 | -0.7222  | 0.4701  |
| maternal bleeding             | 1.0696    | 1.0353 | 1.1051 | 0.0166 | 4.0493   | <0.0001 |
| fetal oxygen deprivation      | 0.8429    | 0.6874 | 1.0336 | 0.1040 | -1.6420  | 0.1005  |
| pregnancy oedema              | 1.1263    | 1.0492 | 1.2090 | 0.0361 | 3.2901   | 0.0010  |
| apgar5 score                  | 1.0963    | 1.0584 | 1.1356 | 0.0179 | 5.1213   | <0.0001 |
| birth weight                  | 1.0224    | 1.0134 | 1.0315 | 0.0045 | 4.9134   | <0.0001 |
| preexisting hypertension      | 1.0731    | 0.8603 | 1.3385 | 0.1127 | 0.6261   | 0.5311  |
| preexisting diabetes          | 1.1615    | 1.0079 | 1.3386 | 0.0723 | 2.0690   | 0.0385  |
| previous induced abortion     | 1.0888    | 1.0652 | 1.1129 | 0.0111 | 7.6198   | <0.0001 |
| previous spontaneous abortion | 1.0468    | 1.0220 | 1.0722 | 0.0122 | 3.7382   | 0.0001  |
| education level               | 0.9623    | 0.9526 | 0.9722 | 0.0051 | -7.3767  | <0.0001 |
| parental income               | 0.9707    | 0.9602 | 0.9813 | 0.0055 | -5.3601  | <0.0001 |
| country                       | 1.2997    | 1.2489 | 1.3527 | 0.0203 | 12.8804  | <0.0001 |
| region Sjælland               | 0.7951    | 0.7730 | 0.8178 | 0.0143 | -15.9584 | <0.0001 |
| region Syddanmark             | 0.8676    | 0.8470 | 0.8886 | 0.0122 | -11.6087 | <0.0001 |
| region Midtjylland            | 0.8544    | 0.8342 | 0.8751 | 0.0121 | -12.9038 | <0.0001 |
| region Nordjylland            | 0.5976    | 0.5772 | 0.6188 | 0.0177 | -29.0272 | <0.0001 |
| mother with disorder          | 1.3345    | 1.3016 | 1.3683 | 0.0127 | 22.6340  | <0.0001 |
| father with disorder          | 1.2917    | 1.2589 | 1.3254 | 0.0131 | 19.5177  | <0.0001 |

| 8. Autoimmune - all           | exp(coef) | LCL    | UCL    | SE     | Z        | Pr(Z)   |
|-------------------------------|-----------|--------|--------|--------|----------|---------|
|                               | surgery   | 1.1928 | 1.0955 | 1.2987 | 0.0433   | 4.0637  |
| paternal age                  | 0.9839    | 0.9666 | 1.0015 | 0.0090 | -1.7920  | 0.0731  |
| maternal age                  | 0.9715    | 0.9521 | 0.9914 | 0.0103 | -2.7895  | 0.0052  |
| gestation length              | 0.9934    | 0.9796 | 1.0074 | 0.0071 | -0.9192  | 0.3579  |
| maternal bleeding             | 1.0847    | 1.0333 | 1.1388 | 0.0248 | 3.2813   | 0.0010  |
| fetal oxygen deprivation      | 1.0483    | 0.7891 | 1.3925 | 0.1448 | 0.3256   | 0.7446  |
| pregnancy oedema              | 1.2107    | 1.0915 | 1.3429 | 0.0528 | 3.6166   | 0.0002  |
| apgar5 score                  | 0.9841    | 0.9316 | 1.0396 | 0.0279 | -0.5697  | 0.5688  |
| birth weight                  | 0.9950    | 0.9819 | 1.0082 | 0.0067 | -0.7438  | 0.4569  |
| preexisting hypertension      | 1.0326    | 0.7476 | 1.4263 | 0.1647 | 0.1951   | 0.8452  |
| preexisting diabetes          | 1.5553    | 1.3135 | 1.8415 | 0.0861 | 5.1250   | <0.0001 |
| previous induced abortion     | 0.9742    | 0.9419 | 1.0077 | 0.0172 | -1.5116  | 0.1306  |
| previous spontaneous abortion | 1.0520    | 1.0153 | 1.0901 | 0.0181 | 2.8010   | 0.0050  |
| education level               | 0.9911    | 0.9760 | 1.0064 | 0.0078 | -1.1384  | 0.2549  |
| parental income               | 1.0117    | 0.9953 | 1.0284 | 0.0083 | 1.3997   | 0.1615  |
| country                       | 0.8921    | 0.8315 | 0.9570 | 0.0358 | -3.1834  | 0.0014  |
| region Sjælland               | 0.9654    | 0.9266 | 1.0058 | 0.0209 | -1.6790  | 0.0931  |
| region Syddanmark             | 0.9770    | 0.9424 | 1.0129 | 0.0184 | -1.2608  | 0.2073  |
| region Midtjylland            | 0.9182    | 0.8854 | 0.9522 | 0.0185 | -4.5920  | <0.0001 |
| region Nordjylland            | 0.7767    | 0.7396 | 0.8156 | 0.0249 | -10.1193 | <0.0001 |
| mother with disorder          | 1.5299    | 1.4688 | 1.5935 | 0.0207 | 20.4572  | <0.0001 |
| father with disorder          | 1.4422    | 1.3817 | 1.5053 | 0.0218 | 16.7602  | <0.0001 |

| 9. Respiratory - all          | exp(coef) | LCL    | UCL    | SE     | Z        | Pr(Z)   |
|-------------------------------|-----------|--------|--------|--------|----------|---------|
|                               | surgery   | 1.4886 | 1.1309 | 1.9594 | 0.1402   | 2.8377  |
| paternal age                  | 0.9996    | 0.9877 | 1.0116 | 0.0060 | -0.0615  | 0.9509  |
| maternal age                  | 0.9595    | 0.9464 | 0.9728 | 0.0070 | -5.8935  | <0.0001 |
| gestation length              | 0.9852    | 0.9757 | 0.9947 | 0.0049 | -3.0253  | 0.0024  |
| maternal bleeding             | 1.0834    | 1.0474 | 1.1206 | 0.0172 | 4.6513   | <0.0001 |
| fetal oxygen deprivation      | 0.9176    | 0.7404 | 1.1371 | 0.1094 | -0.7855  | 0.4321  |
| pregnancy oedema              | 1.1050    | 1.0241 | 1.1923 | 0.0388 | 2.5740   | 0.0100  |
| apgar5 score                  | 1.0527    | 1.0146 | 1.0923 | 0.0188 | 2.7320   | 0.0062  |
| birth weight                  | 1.0015    | 0.9925 | 1.0106 | 0.0046 | 0.3321   | 0.7397  |
| preexisting hypertension      | 1.1662    | 0.9424 | 1.4432 | 0.1087 | 1.4145   | 0.1572  |
| preexisting diabetes          | 1.0094    | 0.8610 | 1.1833 | 0.0811 | 0.1158   | 0.9077  |
| previous induced abortion     | 1.0560    | 1.0324 | 1.0800 | 0.0114 | 4.7433   | <0.0001 |
| previous spontaneous abortion | 1.0331    | 1.0081 | 1.0586 | 0.0124 | 2.6136   | 0.0089  |
| education level               | 1.0008    | 0.9904 | 1.0112 | 0.0052 | 0.1548   | 0.8769  |
| parental income               | 0.9741    | 0.9634 | 0.9850 | 0.0056 | -4.6150  | <0.0001 |
| country                       | 1.2267    | 1.1768 | 1.2787 | 0.0211 | 9.6487   | <0.0001 |
| region Sjælland               | 0.8114    | 0.7886 | 0.8348 | 0.0145 | -14.3841 | <0.0001 |
| region Syddanmark             | 0.8771    | 0.8561 | 0.8986 | 0.0123 | -10.5862 | <0.0001 |
| region Midtjylland            | 0.7360    | 0.7179 | 0.7546 | 0.0127 | -24.0978 | <0.0001 |
| region Nordjylland            | 0.7285    | 0.7053 | 0.7524 | 0.0164 | -19.1977 | <0.0001 |
| mother with disorder          | 1.3296    | 1.3013 | 1.3586 | 0.0110 | 25.8926  | <0.0001 |
| father with disorder          | 1.2407    | 1.2140 | 1.2680 | 0.0111 | 19.4280  | <0.0001 |

| 10. Respiratory - upper       | exp(coef) | LCL    | UCL    | SE     | Z        | Pr(Z)   |
|-------------------------------|-----------|--------|--------|--------|----------|---------|
|                               | surgery   | 1.9998 | 1.5191 | 2.6326 | 0.1402   | 4.9410  |
| paternal age                  | 1.0013    | 0.9866 | 1.0162 | 0.0075 | 0.1786   | 0.8581  |
| maternal age                  | 0.9668    | 0.9504 | 0.9833 | 0.0086 | -3.8879  | 0.0001  |
| gestation length              | 0.9923    | 0.9806 | 1.0041 | 0.0060 | -1.2674  | 0.2049  |
| maternal bleeding             | 1.0761    | 1.0324 | 1.1217 | 0.0211 | 3.4681   | 0.0005  |
| fetal oxygen deprivation      | 0.8362    | 0.6315 | 1.1073 | 0.1432 | -1.2482  | 0.2119  |
| pregnancy oedema              | 1.1372    | 1.0366 | 1.2475 | 0.0472 | 2.7225   | 0.0064  |
| apgar5 score                  | 1.0902    | 1.0427 | 1.1399 | 0.0227 | 3.8019   | 0.0001  |
| birth weight                  | 1.0024    | 0.9913 | 1.0137 | 0.0056 | 0.4308   | 0.6665  |
| preexisting hypertension      | 1.1318    | 0.8663 | 1.4787 | 0.1363 | 0.9082   | 0.3637  |
| preexisting diabetes          | 0.9439    | 0.7702 | 1.1568 | 0.1037 | -0.5558  | 0.5783  |
| previous induced abortion     | 1.0949    | 1.0652 | 1.1254 | 0.0140 | 6.4613   | <0.0001 |
| previous spontaneous abortion | 1.0316    | 1.0010 | 1.0632 | 0.0153 | 2.0251   | 0.0428  |
| education level               | 1.0127    | 0.9998 | 1.0257 | 0.0065 | 1.9369   | 0.0527  |
| parental income               | 0.9900    | 0.9765 | 1.0036 | 0.0069 | -1.4359  | 0.1510  |
| country                       | 1.4063    | 1.3386 | 1.4775 | 0.0251 | 13.5348  | <0.0001 |
| region Sjælland               | 0.8276    | 0.7990 | 0.8572 | 0.0179 | -10.5500 | <0.0001 |
| region Syddanmark             | 0.9339    | 0.9066 | 0.9620 | 0.0151 | -4.5181  | <0.0001 |
| region Midtjylland            | 0.7395    | 0.7169 | 0.7628 | 0.0158 | -19.0335 | <0.0001 |
| region Nordjylland            | 0.6998    | 0.6716 | 0.7291 | 0.0209 | -17.0259 | <0.0001 |
| mother with disorder          | 1.3807    | 1.3371 | 1.4257 | 0.0163 | 19.7293  | <0.0001 |
| father with disorder          | 1.2904    | 1.2479 | 1.3343 | 0.0170 | 14.9377  | <0.0001 |

| 11. Respiratory - lower       | exp(coef) | LCL    | UCL    | SE     | Z        | Pr(Z)   |
|-------------------------------|-----------|--------|--------|--------|----------|---------|
|                               | surgery   | 1.6187 | 1.4204 | 1.8446 | 0.0666   | 7.2258  |
| paternal age                  | 1.0031    | 0.9730 | 1.0342 | 0.0155 | 0.2016   | 0.8401  |
| maternal age                  | 0.9158    | 0.8840 | 0.9487 | 0.0180 | -4.8791  | <0.0001 |
| gestation length              | 0.9408    | 0.9176 | 0.9646 | 0.0127 | -4.7868  | <0.0001 |
| maternal bleeding             | 1.1543    | 1.0620 | 1.2546 | 0.0425 | 3.3752   | 0.0007  |
| fetal oxygen deprivation      | 0.9896    | 0.5850 | 1.6740 | 0.2682 | -0.0388  | 0.9690  |
| pregnancy oedema              | 1.1558    | 0.9588 | 1.3934 | 0.0953 | 1.5190   | 0.1287  |
| apgar5 score                  | 1.1228    | 1.0242 | 1.2309 | 0.0468 | 2.4716   | 0.0134  |
| birth weight                  | 0.9824    | 0.9596 | 1.0058 | 0.0119 | -1.4761  | 0.1399  |
| preexisting hypertension      | 1.2103    | 0.7015 | 2.0879 | 0.2782 | 0.6861   | 0.4926  |
| preexisting diabetes          | 1.4144    | 1.0071 | 1.9864 | 0.1732 | 2.0010   | 0.0453  |
| previous induced abortion     | 1.0015    | 0.9439 | 1.0626 | 0.0302 | 0.0497   | 0.9603  |
| previous spontaneous abortion | 1.1303    | 1.0622 | 1.2029 | 0.0317 | 3.8630   | 0.0001  |
| education level               | 0.9675    | 0.9418 | 0.9939 | 0.0137 | -2.4023  | 0.0162  |
| parental income               | 0.9277    | 0.9014 | 0.9547 | 0.0146 | -5.1210  | <0.0001 |
| country                       | 1.1097    | 0.9986 | 1.2332 | 0.0538 | 1.9339   | 0.0531  |
| region Sjælland               | 0.7978    | 0.7428 | 0.8569 | 0.0364 | -6.1951  | <0.0001 |
| region Syddanmark             | 0.7261    | 0.6812 | 0.7740 | 0.0325 | -9.8266  | <0.0001 |
| region Midtjylland            | 0.6505    | 0.6093 | 0.6945 | 0.0333 | -12.8737 | <0.0001 |
| region Nordjylland            | 0.6551    | 0.6021 | 0.7128 | 0.0430 | -9.8243  | <0.0001 |
| mother with disorder          | 1.5851    | 1.4441 | 1.7399 | 0.0475 | 9.6899   | <0.0001 |
| father with disorder          | 1.3628    | 1.2430 | 1.4941 | 0.0469 | 6.5931   | <0.0001 |

| 12. Respiratory - chronic lower | exp(coef) | LCL    | UCL    | SE     | Z        | Pr(Z)   |
|---------------------------------|-----------|--------|--------|--------|----------|---------|
|                                 | surgery   | 1.4465 | 1.3335 | 1.5690 | 0.0414   | 8.8969  |
| paternal age                    | 0.9980    | 0.9807 | 1.0156 | 0.0089 | -0.2172  | 0.8280  |
| maternal age                    | 0.9755    | 0.9560 | 0.9954 | 0.0102 | -2.4069  | 0.0160  |
| gestation length                | 0.9670    | 0.9535 | 0.9806 | 0.0071 | -4.7003  | <0.0001 |
| maternal bleeding               | 1.1178    | 1.0655 | 1.1726 | 0.0244 | 4.5602   | <0.0001 |
| fetal oxygen deprivation        | 1.0408    | 0.7597 | 1.4261 | 0.1606 | 0.2493   | 0.8030  |
| pregnancy oedema                | 1.1233    | 1.0023 | 1.2590 | 0.0581 | 2.0000   | 0.0454  |
| apgar5 score                    | 1.0730    | 1.0185 | 1.1303 | 0.0265 | 2.6522   | 0.0079  |
| birth weight                    | 0.9772    | 0.9643 | 0.9903 | 0.0068 | -3.3801  | 0.0007  |
| preexisting hypertension        | 0.8698    | 0.6113 | 1.2376 | 0.1799 | -0.7747  | 0.4384  |
| preexisting diabetes            | 0.9545    | 0.7553 | 1.2062 | 0.1194 | -0.3899  | 0.6965  |
| previous induced abortion       | 1.0226    | 0.9891 | 1.0572 | 0.0169 | 1.3194   | 0.1870  |
| previous spontaneous abortion   | 1.0530    | 1.0158 | 1.0914 | 0.0183 | 2.8211   | 0.0047  |
| education level                 | 1.0239    | 1.0081 | 1.0400 | 0.0079 | 2.9890   | 0.0027  |
| parental income                 | 0.9431    | 0.9276 | 0.9589 | 0.0084 | -6.9059  | <0.0001 |
| country                         | 0.9559    | 0.8960 | 1.0197 | 0.0329 | -1.3669  | 0.1716  |
| region Sjælland                 | 0.8193    | 0.7853 | 0.8547 | 0.0215 | -9.2252  | <0.0001 |
| region Syddanmark               | 0.9663    | 0.9325 | 1.0013 | 0.0181 | -1.8852  | 0.0593  |
| region Midtjylland              | 0.7513    | 0.7235 | 0.7802 | 0.0192 | -14.8478 | <0.0001 |
| region Nordjylland              | 0.8561    | 0.8173 | 0.8967 | 0.0236 | -6.5653  | <0.0001 |
| mother with disorder            | 1.9777    | 1.8882 | 2.0715 | 0.0236 | 28.8591  | <0.0001 |
| father with disorder            | 1.7727    | 1.6831 | 1.8671 | 0.0264 | 21.6381  | <0.0001 |

| 13. Respiratory - asthma      | exp(coef) | LCL    | UCL    | SE     | Z        | Pr(Z)   |
|-------------------------------|-----------|--------|--------|--------|----------|---------|
|                               | surgery   | 1.4513 | 1.3374 | 1.5748 | 0.0416   | 8.9332  |
| paternal age                  | 1.0082    | 0.9906 | 1.0261 | 0.0089 | 0.9119   | 0.3618  |
| maternal age                  | 0.9757    | 0.9560 | 0.9957 | 0.0103 | -2.3732  | 0.0176  |
| gestation length              | 0.9623    | 0.9488 | 0.9759 | 0.0071 | -5.3570  | <0.0001 |
| maternal bleeding             | 1.1237    | 1.0710 | 1.1789 | 0.0244 | 4.7644   | <0.0001 |
| fetal oxygen deprivation      | 1.0800    | 0.7913 | 1.4739 | 0.1586 | 0.4853   | 0.6274  |
| pregnancy oedema              | 1.1080    | 0.9869 | 1.2439 | 0.0590 | 1.7372   | 0.0823  |
| apgar5 score                  | 1.0726    | 1.0180 | 1.1302 | 0.0266 | 2.6305   | 0.0085  |
| birth weight                  | 0.9758    | 0.9628 | 0.9890 | 0.0068 | -3.5724  | 0.0003  |
| preexisting hypertension      | 0.8696    | 0.6111 | 1.2373 | 0.1799 | -0.7763  | 0.4375  |
| preexisting diabetes          | 0.9582    | 0.7582 | 1.2109 | 0.1194 | -0.3573  | 0.7208  |
| previous induced abortion     | 1.0245    | 0.9908 | 1.0594 | 0.0170 | 1.4236   | 0.1545  |
| previous spontaneous abortion | 1.0565    | 1.0191 | 1.0953 | 0.0184 | 2.9903   | 0.0027  |
| education level               | 1.0159    | 1.0002 | 1.0319 | 0.0079 | 1.9914   | 0.0464  |
| parental income               | 0.9375    | 0.9219 | 0.9532 | 0.0085 | -7.5791  | <0.0001 |
| country                       | 0.9329    | 0.8740 | 0.9957 | 0.0332 | -2.0893  | 0.0366  |
| region Sjælland               | 0.8203    | 0.7861 | 0.8560 | 0.0217 | -9.1132  | <0.0001 |
| region Syddanmark             | 0.9636    | 0.9297 | 0.9987 | 0.0182 | -2.0269  | 0.0426  |
| region Midtjylland            | 0.7551    | 0.7271 | 0.7843 | 0.0193 | -14.5290 | <0.0001 |
| region Nordjylland            | 0.8550    | 0.8161 | 0.8958 | 0.0237 | -6.5858  | <0.0001 |
| mother with disorder          | 2.1842    | 2.0761 | 2.2978 | 0.0258 | 30.1915  | <0.0001 |
| father with disorder          | 2.0609    | 1.9372 | 2.1923 | 0.0315 | 22.9156  | <0.0001 |

| 14. Respiratory - influenza   | exp(coef) | LCL    | UCL    | SE     | Z        | Pr(Z)   |
|-------------------------------|-----------|--------|--------|--------|----------|---------|
|                               | surgery   | 1.4652 | 1.1845 | 1.8124 | 0.1085   | 3.5204  |
| paternal age                  | 1.0202    | 0.9726 | 1.0701 | 0.0243 | 0.8219   | 0.4111  |
| maternal age                  | 0.9128    | 0.8634 | 0.9651 | 0.0283 | -3.2111  | 0.0013  |
| gestation length              | 0.9109    | 0.8753 | 0.9479 | 0.0203 | -4.5871  | <0.0001 |
| maternal bleeding             | 1.0735    | 0.9375 | 1.2293 | 0.0691 | 1.0268   | 0.3044  |
| fetal oxygen deprivation      | 1.9432    | 1.0070 | 3.7499 | 0.3354 | 1.9807   | 0.0476  |
| pregnancy oedema              | 1.3781    | 1.0339 | 1.8368 | 0.1465 | 2.1877   | 0.0286  |
| apgar5 score                  | 1.1003    | 0.9500 | 1.2744 | 0.0749 | 1.2756   | 0.2020  |
| birth weight                  | 0.9716    | 0.9355 | 1.0091 | 0.0193 | -1.4885  | 0.1365  |
| preexisting hypertension      | 2.8172    | 1.5926 | 4.9834 | 0.2910 | 3.5592   | 0.0003  |
| preexisting diabetes          | 1.3105    | 0.7567 | 2.2694 | 0.2801 | 0.9653   | 0.3343  |
| previous induced abortion     | 1.0225    | 0.9306 | 1.1235 | 0.0480 | 0.4634   | 0.6430  |
| previous spontaneous abortion | 1.0899    | 0.9852 | 1.2056 | 0.0514 | 1.6719   | 0.0945  |
| education level               | 0.9502    | 0.9107 | 0.9913 | 0.0216 | -2.3608  | 0.0182  |
| parental income               | 0.8971    | 0.8570 | 0.9392 | 0.0233 | -4.6444  | <0.0001 |
| country                       | 1.9293    | 1.6906 | 2.2018 | 0.0673 | 9.7526   | <0.0001 |
| region Sjælland               | 0.7028    | 0.6278 | 0.7868 | 0.0575 | -6.1223  | <0.0001 |
| region Syddanmark             | 0.5771    | 0.5202 | 0.6403 | 0.0529 | -10.3719 | <0.0001 |
| region Midtjylland            | 0.5170    | 0.4643 | 0.5756 | 0.0547 | -12.0414 | <0.0001 |
| region Nordjylland            | 0.4885    | 0.4219 | 0.5656 | 0.0747 | -9.5847  | <0.0001 |
| mother with disorder          | 2.5029    | 1.9371 | 3.2339 | 0.1307 | 7.0172   | <0.0001 |
| father with disorder          | 1.7058    | 1.1888 | 2.4475 | 0.1842 | 2.8990   | 0.0037  |

| 15. Respiratory - pneumonia   | exp(coef) | LCL    | UCL    | SE     | Z        | Pr(Z)   |
|-------------------------------|-----------|--------|--------|--------|----------|---------|
|                               | surgery   | 1.6536 | 1.4459 | 1.8912 | 0.0684   | 7.3452  |
| paternal age                  | 0.9994    | 0.9680 | 1.0319 | 0.0163 | -0.0319  | 0.9745  |
| maternal age                  | 0.9195    | 0.8861 | 0.9541 | 0.0188 | -4.4449  | <0.0001 |
| gestation length              | 0.9415    | 0.9173 | 0.9663 | 0.0132 | -4.5359  | <0.0001 |
| maternal bleeding             | 1.1920    | 1.0939 | 1.2988 | 0.0437 | 4.0101   | <0.0001 |
| fetal oxygen deprivation      | 0.7814    | 0.4197 | 1.4549 | 0.3171 | -0.7775  | 0.4368  |
| pregnancy oedema              | 1.1725    | 0.9649 | 1.4247 | 0.0994 | 1.6006   | 0.1094  |
| apgar5 score                  | 1.1345    | 1.0314 | 1.2478 | 0.0485 | 2.5983   | 0.0093  |
| birth weight                  | 0.9902    | 0.9662 | 1.0149 | 0.0125 | -0.7787  | 0.4361  |
| preexisting hypertension      | 1.3374    | 0.7752 | 2.3076 | 0.2782 | 1.0449   | 0.2960  |
| preexisting diabetes          | 1.3807    | 0.9675 | 1.9705 | 0.1814 | 1.7780   | 0.0753  |
| previous induced abortion     | 0.9952    | 0.9354 | 1.0589 | 0.0316 | -0.1507  | 0.8801  |
| previous spontaneous abortion | 1.1223    | 1.0514 | 1.1979 | 0.0332 | 3.4694   | 0.0005  |
| education level               | 0.9627    | 0.9359 | 0.9902 | 0.0144 | -2.6368  | 0.0083  |
| parental income               | 0.9391    | 0.9112 | 0.9677 | 0.0153 | -4.0913  | <0.0001 |
| country                       | 1.1092    | 0.9936 | 1.2383 | 0.0561 | 1.8459   | 0.0648  |
| region Sjælland               | 0.7750    | 0.7191 | 0.8353 | 0.0381 | -6.6694  | <0.0001 |
| region Syddanmark             | 0.7303    | 0.6835 | 0.7803 | 0.0337 | -9.3001  | <0.0001 |
| region Midtjylland            | 0.6380    | 0.5957 | 0.6833 | 0.0349 | -12.8422 | <0.0001 |
| region Nordjylland            | 0.6024    | 0.5502 | 0.6596 | 0.0462 | -10.9559 | <0.0001 |
| mother with disorder          | 1.5898    | 1.4350 | 1.7613 | 0.0522 | 8.8721   | <0.0001 |
| father with disorder          | 1.3477    | 1.2190 | 1.4899 | 0.0511 | 5.8299   | <0.0001 |

| 16. Respiratory - COPD        | exp(coef) | LCL    | UCL    | SE       | Z       | Pr(Z)   |
|-------------------------------|-----------|--------|--------|----------|---------|---------|
|                               | surgery   | 2.1195 | 1.5349 | 2.9268   | 0.1646  | 4.5620  |
| paternal age                  | 0.9527    | 0.8649 | 1.0495 | 0.0493   | -0.9807 | 0.3267  |
| maternal age                  | 0.9454    | 0.8460 | 1.0566 | 0.0567   | -0.9888 | 0.3227  |
| gestation length              | 1.0242    | 0.9455 | 1.1094 | 0.0407   | 0.5867  | 0.5573  |
| maternal bleeding             | 1.2796    | 0.9911 | 1.6520 | 0.1303   | 1.8918  | 0.0585  |
| fetal oxygen deprivation      | 0.6305    | 0.0883 | 4.5002 | 1.0026   | -0.4598 | 0.6456  |
| pregnancy oedema              | 1.5897    | 0.9917 | 2.5483 | 0.2407   | 1.9255  | 0.0541  |
| apgar5 score                  | 1.1194    | 0.8310 | 1.5080 | 0.1520   | 0.7424  | 0.4578  |
| birth weight                  | 0.8669    | 0.8040 | 0.9347 | 0.0384   | -3.7147 | 0.0002  |
| preexisting hypertension      | 0.0000    | 0.0000 | Inf    | 699.1457 | -0.0186 | 0.9851  |
| preexisting diabetes          | 1.1143    | 0.2766 | 4.4894 | 0.7109   | 0.1523  | 0.8789  |
| previous induced abortion     | 1.1268    | 0.9378 | 1.3540 | 0.0936   | 1.2752  | 0.2022  |
| previous spontaneous abortion | 1.0182    | 0.8283 | 1.2515 | 0.1052   | 0.1713  | 0.8639  |
| education level               | 0.9994    | 0.9169 | 1.0892 | 0.0439   | -0.0136 | 0.9891  |
| parental income               | 0.8112    | 0.7408 | 0.8883 | 0.0463   | -4.5148 | <0.0001 |
| country                       | 1.1506    | 0.8256 | 1.6037 | 0.1693   | 0.8285  | 0.4073  |
| region Sjælland               | 0.8304    | 0.6644 | 1.0378 | 0.1137   | -1.6337 | 0.1023  |
| region Syddanmark             | 0.6986    | 0.5690 | 0.8576 | 0.1046   | -3.4268 | 0.0006  |
| region Midtjylland            | 0.5772    | 0.4634 | 0.7190 | 0.1120   | -4.9042 | <0.0001 |
| region Nordjylland            | 0.7104    | 0.5463 | 0.9238 | 0.1340   | -2.5508 | 0.0107  |
| mother with disorder          | 1.9286    | 1.3686 | 2.7177 | 0.1749   | 3.7534  | 0.0001  |
| father with disorder          | 1.6667    | 1.1832 | 2.3478 | 0.1748   | 2.9226  | 0.0034  |

| 17. Digestive - all           | exp(coef) | LCL    | UCL    | SE     | Z        | Pr(Z)   |
|-------------------------------|-----------|--------|--------|--------|----------|---------|
|                               | surgery   | 1.1319 | 1.0747 | 1.1921 | 0.0264   | 4.6864  |
| paternal age                  | 0.9811    | 0.9705 | 0.9918 | 0.0055 | -3.4424  | 0.0005  |
| maternal age                  | 0.9174    | 0.9060 | 0.9289 | 0.0063 | -13.5176 | <0.0001 |
| gestation length              | 0.9826    | 0.9741 | 0.9912 | 0.0044 | -3.9438  | <0.0001 |
| maternal bleeding             | 1.0647    | 1.0329 | 1.0974 | 0.0154 | 4.0634   | <0.0001 |
| fetal oxygen deprivation      | 1.0383    | 0.8749 | 1.2323 | 0.0873 | 0.4308   | 0.6665  |
| pregnancy oedema              | 1.1367    | 1.0668 | 1.2112 | 0.0323 | 3.9597   | <0.0001 |
| apgar5 score                  | 1.0578    | 1.0234 | 1.0934 | 0.0168 | 3.3320   | 0.0008  |
| birth weight                  | 0.9809    | 0.9729 | 0.9889 | 0.0041 | -4.6309  | <0.0001 |
| preexisting hypertension      | 1.0011    | 0.8090 | 1.2388 | 0.1086 | 0.0107   | 0.9913  |
| preexisting diabetes          | 1.1478    | 1.0010 | 1.3161 | 0.0698 | 1.9752   | 0.0482  |
| previous induced abortion     | 1.0374    | 1.0163 | 1.0590 | 0.0104 | 3.5102   | 0.0004  |
| previous spontaneous abortion | 1.0460    | 1.0231 | 1.0694 | 0.0112 | 3.9893   | <0.0001 |
| education level               | 0.9591    | 0.9501 | 0.9682 | 0.0048 | -8.6570  | <0.0001 |
| parental income               | 0.9855    | 0.9756 | 0.9955 | 0.0051 | -2.8342  | 0.0045  |
| country                       | 0.8454    | 0.8096 | 0.8828 | 0.0220 | -7.6009  | <0.0001 |
| region Sjælland               | 0.9590    | 0.9346 | 0.9840 | 0.0131 | -3.1806  | 0.0014  |
| region Syddanmark             | 1.0309    | 1.0082 | 1.0542 | 0.0113 | 2.6825   | 0.0073  |
| region Midtjylland            | 0.8759    | 0.8560 | 0.8964 | 0.0117 | -11.2440 | <0.0001 |
| region Nordjylland            | 0.9177    | 0.8918 | 0.9444 | 0.0146 | -5.8751  | <0.0001 |
| mother with disorder          | 1.3052    | 1.2825 | 1.3284 | 0.0089 | 29.7029  | <0.0001 |
| father with disorder          | 1.1841    | 1.1634 | 1.2051 | 0.0089 | 18.8522  | <0.0001 |

| 18. Endocrine - all           | exp(coef) | LCL    | UCL    | SE     | Z        | Pr(Z)   |
|-------------------------------|-----------|--------|--------|--------|----------|---------|
|                               | surgery   | 1.2498 | 1.1615 | 1.3448 | 0.0373   | 5.9680  |
| paternal age                  | 0.9493    | 0.9343 | 0.9646 | 0.0081 | -6.3778  | <0.0001 |
| maternal age                  | 0.8715    | 0.8556 | 0.8878 | 0.0094 | -14.5499 | <0.0001 |
| gestation length              | 0.9888    | 0.9758 | 1.0020 | 0.0067 | -1.6617  | 0.0965  |
| maternal bleeding             | 1.0630    | 1.0151 | 1.1131 | 0.0235 | 2.5993   | 0.0093  |
| fetal oxygen deprivation      | 1.1572    | 0.9064 | 1.4773 | 0.1246 | 1.1720   | 0.2411  |
| pregnancy oedema              | 1.2313    | 1.1321 | 1.3393 | 0.0428 | 4.8531   | <0.0001 |
| apgar5 score                  | 1.1654    | 1.1098 | 1.2237 | 0.0249 | 6.1377   | <0.0001 |
| birth weight                  | 1.0353    | 1.0227 | 1.0482 | 0.0062 | 5.5293   | <0.0001 |
| preexisting hypertension      | 1.0635    | 0.7852 | 1.4404 | 0.1547 | 0.3979   | 0.6906  |
| preexisting diabetes          | 1.5223    | 1.2944 | 1.7905 | 0.0827 | 5.0777   | <0.0001 |
| previous induced abortion     | 1.0197    | 0.9881 | 1.0524 | 0.0160 | 1.2183   | 0.2230  |
| previous spontaneous abortion | 1.0518    | 1.0169 | 1.0878 | 0.0171 | 2.9394   | 0.0032  |
| education level               | 0.8468    | 0.8349 | 0.8589 | 0.0072 | -23.0261 | <0.0001 |
| parental income               | 0.8842    | 0.8709 | 0.8978 | 0.0077 | -15.8490 | <0.0001 |
| country                       | 0.8548    | 0.8056 | 0.9070 | 0.0302 | -5.1861  | <0.0001 |
| region Sjælland               | 1.2519    | 1.2060 | 1.2995 | 0.0190 | 11.7993  | <0.0001 |
| region Syddanmark             | 1.1694    | 1.1305 | 1.2095 | 0.0172 | 9.0799   | <0.0001 |
| region Midtjylland            | 0.8271    | 0.7972 | 0.8580 | 0.0187 | -10.1180 | <0.0001 |
| region Nordjylland            | 0.8678    | 0.8292 | 0.9083 | 0.0232 | -6.0970  | <0.0001 |
| mother with disorder          | 1.6514    | 1.6044 | 1.6997 | 0.0147 | 34.1040  | <0.0001 |
| father with disorder          | 1.5128    | 1.4625 | 1.5649 | 0.0172 | 23.9887  | <0.0001 |

| 19. Endocrine - obesity       | exp(coef) | LCL    | UCL    | SE     | Z        | Pr(Z)   |
|-------------------------------|-----------|--------|--------|--------|----------|---------|
|                               | surgery   | 1.1916 | 1.0885 | 1.3046 | 0.0462   | 3.7952  |
| paternal age                  | 0.9285    | 0.9103 | 0.9471 | 0.0101 | -7.3198  | <0.0001 |
| maternal age                  | 0.8198    | 0.8009 | 0.8391 | 0.0118 | -16.6960 | <0.0001 |
| gestation length              | 1.0050    | 0.9885 | 1.0218 | 0.0084 | 0.5936   | 0.5527  |
| maternal bleeding             | 1.0765    | 1.0160 | 1.1406 | 0.0295 | 2.4979   | 0.0124  |
| fetal oxygen deprivation      | 1.1821    | 0.8724 | 1.6019 | 0.1550 | 1.0795   | 0.2803  |
| pregnancy oedema              | 1.2645    | 1.1456 | 1.3959 | 0.0504 | 4.6559   | <0.0001 |
| apgar5 score                  | 1.1945    | 1.1242 | 1.2693 | 0.0309 | 5.7399   | <0.0001 |
| birth weight                  | 1.0755    | 1.0590 | 1.0923 | 0.0079 | 9.2091   | <0.0001 |
| preexisting hypertension      | 1.1374    | 0.7892 | 1.6392 | 0.1864 | 0.6905   | 0.4898  |
| preexisting diabetes          | 1.6679    | 1.3602 | 2.0452 | 0.1040 | 4.9169   | <0.0001 |
| previous induced abortion     | 1.0187    | 0.9790 | 1.0600 | 0.0202 | 0.9145   | 0.3604  |
| previous spontaneous abortion | 1.0662    | 1.0216 | 1.1128 | 0.0218 | 2.9422   | 0.0032  |
| education level               | 0.7639    | 0.7503 | 0.7778 | 0.0092 | -29.2593 | <0.0001 |
| parental income               | 0.8557    | 0.8394 | 0.8723 | 0.0098 | -15.8812 | <0.0001 |
| country                       | 0.6193    | 0.5712 | 0.6716 | 0.0413 | -11.5984 | <0.0001 |
| region Sjælland               | 1.4857    | 1.4184 | 1.5563 | 0.0236 | 16.7269  | <0.0001 |
| region Syddanmark             | 1.3026    | 1.2478 | 1.3599 | 0.0219 | 12.0420  | <0.0001 |
| region Midtjylland            | 0.7980    | 0.7602 | 0.8377 | 0.0247 | -9.1105  | <0.0001 |
| region Nordjylland            | 0.8534    | 0.8042 | 0.9055 | 0.0302 | -5.2406  | <0.0001 |
| mother with disorder          | 2.3340    | 2.2258 | 2.4475 | 0.0242 | 34.9937  | <0.0001 |
| father with disorder          | 1.9770    | 1.8367 | 2.1281 | 0.0375 | 18.1434  | <0.0001 |

| 20. Genitourinary - all       | exp(coef) | LCL    | UCL    | SE     | Z        | Pr(Z)   |
|-------------------------------|-----------|--------|--------|--------|----------|---------|
|                               | surgery   | 1.1776 | 1.0853 | 1.2777 | 0.0416   | 3.9267  |
| paternal age                  | 0.9672    | 0.9510 | 0.9836 | 0.0086 | -3.8722  | 0.0001  |
| maternal age                  | 0.8900    | 0.8726 | 0.9076 | 0.0100 | -11.6140 | <0.0001 |
| gestation length              | 0.9816    | 0.9681 | 0.9953 | 0.0070 | -2.6129  | 0.0089  |
| maternal bleeding             | 1.1251    | 1.0738 | 1.1789 | 0.0238 | 4.9503   | <0.0001 |
| fetal oxygen deprivation      | 0.8135    | 0.5889 | 1.1239 | 0.1648 | -1.2512  | 0.2108  |
| pregnancy oedema              | 1.1380    | 1.0275 | 1.2605 | 0.0521 | 2.4806   | 0.0131  |
| apgar5 score                  | 1.0480    | 0.9934 | 1.1056 | 0.0272 | 1.7202   | 0.0853  |
| birth weight                  | 0.9581    | 0.9456 | 0.9707 | 0.0066 | -6.4206  | <0.0001 |
| preexisting hypertension      | 1.2001    | 0.8862 | 1.6252 | 0.1547 | 1.1793   | 0.2382  |
| preexisting diabetes          | 1.1710    | 0.9452 | 1.4507 | 0.1092 | 1.4447   | 0.1485  |
| previous induced abortion     | 1.1267    | 1.0917 | 1.1629 | 0.0161 | 7.4076   | <0.0001 |
| previous spontaneous abortion | 1.0440    | 1.0078 | 1.0815 | 0.0180 | 2.3915   | 0.0167  |
| education level               | 0.9250    | 0.9113 | 0.9389 | 0.0076 | -10.2393 | <0.0001 |
| parental income               | 0.9283    | 0.9138 | 0.9430 | 0.0080 | -9.2393  | <0.0001 |
| country                       | 0.8874    | 0.8347 | 0.9433 | 0.0312 | -3.8270  | 0.0001  |
| region Sjælland               | 0.7068    | 0.6791 | 0.7357 | 0.0203 | -17.0072 | <0.0001 |
| region Syddanmark             | 0.6676    | 0.6445 | 0.6915 | 0.0179 | -22.4944 | <0.0001 |
| region Midtjylland            | 0.6189    | 0.5970 | 0.6415 | 0.0183 | -26.1738 | <0.0001 |
| region Nordjylland            | 0.6194    | 0.5913 | 0.6488 | 0.0236 | -20.2316 | <0.0001 |
| mother with disorder          | 1.3177    | 1.2758 | 1.3610 | 0.0164 | 16.7316  | <0.0001 |
| father with disorder          | 1.2786    | 1.2218 | 1.3379 | 0.0231 | 10.6155  | <0.0001 |

| <b>21. Genitourinary - kidney infection</b> | <b>exp(coef)</b> | <b>LCL</b> | <b>UCL</b> | <b>SE</b> | <b>Z</b> | <b>Pr(Z)</b> |
|---------------------------------------------|------------------|------------|------------|-----------|----------|--------------|
| <b>surgery</b>                              | 1.4194           | 1.1611     | 1.7350     | 0.1024    | 3.4185   | 0.0006       |
| <b>paternal age</b>                         | 0.9844           | 0.9431     | 1.0277     | 0.0219    | -0.7128  | 0.4759       |
| <b>maternal age</b>                         | 0.8572           | 0.8151     | 0.9014     | 0.0256    | -6.0013  | <0.0001      |
| <b>gestation length</b>                     | 1.0140           | 0.9792     | 1.0502     | 0.0178    | 0.7834   | 0.4333       |
| <b>maternal bleeding</b>                    | 1.1370           | 1.0100     | 1.2799     | 0.0604    | 2.1254   | 0.0335       |
| <b>fetal oxygen deprivation</b>             | 0.7711           | 0.3202     | 1.8569     | 0.4483    | -0.5795  | 0.5622       |
| <b>pregnancy oedema</b>                     | 0.8451           | 0.6180     | 1.1555     | 0.1596    | -1.0540  | 0.2918       |
| <b>apgar5 score</b>                         | 1.1387           | 0.9981     | 1.2991     | 0.0672    | 1.9321   | 0.0533       |
| <b>birth weight</b>                         | 0.9874           | 0.9553     | 1.0206     | 0.0168    | -0.7468  | 0.4551       |
| <b>preexisting hypertension</b>             | 0.5216           | 0.1679     | 1.6195     | 0.5780    | -1.1259  | 0.2602       |
| <b>preexisting diabetes</b>                 | 1.4261           | 0.8824     | 2.3047     | 0.2449    | 1.4493   | 0.1472       |
| <b>previous induced abortion</b>            | 1.1702           | 1.0817     | 1.2659     | 0.0401    | 3.9185   | <0.0001      |
| <b>previous spontaneous abortion</b>        | 1.1164           | 1.0232     | 1.2181     | 0.0444    | 2.4758   | 0.0132       |
| <b>education level</b>                      | 0.9354           | 0.9003     | 0.9719     | 0.0194    | -3.4217  | 0.0006       |
| <b>parental income</b>                      | 0.9560           | 0.9183     | 0.9953     | 0.0205    | -2.1859  | 0.0288       |
| <b>country</b>                              | 0.6327           | 0.5305     | 0.7546     | 0.0898    | -5.0920  | <0.0001      |
| <b>region Sjælland</b>                      | 0.6796           | 0.6139     | 0.7524     | 0.0519    | -7.4392  | <0.0001      |
| <b>region Syddanmark</b>                    | 0.6308           | 0.5764     | 0.6904     | 0.0460    | -10.0116 | <0.0001      |
| <b>region Midtjylland</b>                   | 0.6346           | 0.5801     | 0.6942     | 0.0457    | -9.9351  | <0.0001      |
| <b>region Nordjylland</b>                   | 0.6390           | 0.5696     | 0.7169     | 0.0586    | -7.6325  | <0.0001      |
| <b>mother with disorder</b>                 | 1.5065           | 1.2137     | 1.8699     | 0.1102    | 3.7173   | 0.0002       |
| <b>father with disorder</b>                 | 1.7034           | 1.1196     | 2.5916     | 0.2141    | 2.4877   | 0.0128       |

| <b>22. Musculoskeletal - all</b>     | <b>exp(coef)</b> | <b>LCL</b> | <b>UCL</b> | <b>SE</b> | <b>Z</b> | <b>Pr(Z)</b> |
|--------------------------------------|------------------|------------|------------|-----------|----------|--------------|
| <b>surgery</b>                       | 1.1507           | 1.1060     | 1.1972     | 0.0201    | 6.9515   | <0.0001      |
| <b>paternal age</b>                  | 0.9734           | 0.9655     | 0.9814     | 0.0041    | -6.4612  | <0.0001      |
| <b>maternal age</b>                  | 0.9366           | 0.9278     | 0.9454     | 0.0047    | -13.6665 | <0.0001      |
| <b>gestation length</b>              | 1.0002           | 0.9937     | 1.0067     | 0.0033    | 0.0669   | 0.9465       |
| <b>maternal bleeding</b>             | 1.0876           | 1.0634     | 1.1122     | 0.0114    | 7.3392   | <0.0001      |
| <b>fetal oxygen deprivation</b>      | 1.1704           | 1.0404     | 1.3165     | 0.0600    | 2.6209   | 0.0087       |
| <b>pregnancy oedema</b>              | 1.1067           | 1.0522     | 1.1641     | 0.0257    | 3.9332   | <0.0001      |
| <b>apgar5 score</b>                  | 1.0178           | 0.9925     | 1.0437     | 0.0128    | 1.3744   | 0.1693       |
| <b>birth weight</b>                  | 0.9898           | 0.9838     | 0.9959     | 0.0031    | -3.2653  | 0.0010       |
| <b>preexisting hypertension</b>      | 1.0574           | 0.9087     | 1.2304     | 0.0773    | 0.7221   | 0.4701       |
| <b>preexisting diabetes</b>          | 1.0131           | 0.9114     | 1.1261     | 0.0539    | 0.2420   | 0.8087       |
| <b>previous induced abortion</b>     | 1.0479           | 1.0320     | 1.0640     | 0.0078    | 5.9985   | <0.0001      |
| <b>previous spontaneous abortion</b> | 1.0304           | 1.0135     | 1.0477     | 0.0084    | 3.5428   | 0.0003       |
| <b>education level</b>               | 0.9552           | 0.9484     | 0.9620     | 0.0036    | -12.6205 | <0.0001      |
| <b>parental income</b>               | 0.9932           | 0.9856     | 1.0008     | 0.0038    | -1.7512  | 0.0799       |
| <b>country</b>                       | 0.8558           | 0.8291     | 0.8834     | 0.0161    | -9.6201  | <0.0001      |
| <b>region Sjælland</b>               | 0.8460           | 0.8293     | 0.8630     | 0.0101    | -16.4093 | <0.0001      |
| <b>region Syddanmark</b>             | 0.8842           | 0.8692     | 0.8995     | 0.0087    | -14.0782 | <0.0001      |
| <b>region Midtjylland</b>            | 1.0389           | 1.0220     | 1.0561     | 0.0083    | 4.5636   | <0.0001      |
| <b>region Nordjylland</b>            | 0.8327           | 0.8144     | 0.8513     | 0.0112    | -16.2125 | <0.0001      |
| <b>mother with disorder</b>          | 1.3412           | 1.3250     | 1.3576     | 0.0061    | 47.3784  | <0.0001      |
| <b>father with disorder</b>          | 1.2297           | 1.2147     | 1.2449     | 0.0062    | 33.0616  | <0.0001      |



| 23. Neoplasms - all           | exp(coef) | LCL    | UCL    | SE     | Z       | Pr(Z)   |
|-------------------------------|-----------|--------|--------|--------|---------|---------|
|                               | surgery   | 1.1965 | 1.1090 | 1.2910 | 0.0387  | 4.6301  |
| paternal age                  | 0.9826    | 0.9669 | 0.9986 | 0.0082 | -2.1247 | 0.0336  |
| maternal age                  | 0.9713    | 0.9537 | 0.9893 | 0.0093 | -3.0998 | 0.0019  |
| gestation length              | 0.9992    | 0.9866 | 1.0120 | 0.0064 | -0.1093 | 0.9129  |
| maternal bleeding             | 1.0699    | 1.0235 | 1.1183 | 0.0225 | 2.9919  | 0.0027  |
| fetal oxygen deprivation      | 1.1125    | 0.8807 | 1.4053 | 0.1191 | 0.8948  | 0.3708  |
| pregnancy oedema              | 1.0002    | 0.9063 | 1.1039 | 0.0503 | 0.0050  | 0.9960  |
| apgar5 score                  | 0.9849    | 0.9368 | 1.0355 | 0.0255 | -0.5920 | 0.5538  |
| birth weight                  | 1.0192    | 1.0071 | 1.0314 | 0.0060 | 3.1394  | 0.0016  |
| preexisting hypertension      | 0.9166    | 0.6637 | 1.2658 | 0.1646 | -0.5285 | 0.5970  |
| preexisting diabetes          | 1.0152    | 0.8217 | 1.2542 | 0.1078 | 0.1399  | 0.8887  |
| previous induced abortion     | 0.9909    | 0.9612 | 1.0216 | 0.0155 | -0.5825 | 0.5601  |
| previous spontaneous abortion | 1.0214    | 0.9889 | 1.0550 | 0.0165 | 1.2880  | 0.1977  |
| education level               | 1.0070    | 0.9932 | 1.0210 | 0.0070 | 1.0015  | 0.3165  |
| parental income               | 1.0274    | 1.0124 | 1.0426 | 0.0074 | 3.6129  | 0.0003  |
| country                       | 0.9162    | 0.8565 | 0.9801 | 0.0343 | -2.5445 | 0.0109  |
| region Sjælland               | 1.1096    | 1.0683 | 1.1525 | 0.0193 | 5.3800  | <0.0001 |
| region Syddanmark             | 1.1874    | 1.1488 | 1.2273 | 0.0168 | 10.1777 | <0.0001 |
| region Midtjylland            | 1.1417    | 1.1044 | 1.1802 | 0.0169 | 7.8273  | <0.0001 |
| region Nordjylland            | 0.9370    | 0.8967 | 0.9790 | 0.0224 | -2.9026 | 0.0037  |
| mother with disorder          | 1.1846    | 1.1558 | 1.2140 | 0.0125 | 13.5036 | <0.0001 |
| father with disorder          | 1.1538    | 1.1164 | 1.1924 | 0.0167 | 8.5200  | <0.0001 |

| 24. Neoplasms - benign        | exp(coef) | LCL    | UCL    | SE     | Z       | Pr(Z)   |
|-------------------------------|-----------|--------|--------|--------|---------|---------|
|                               | surgery   | 1.1925 | 1.0976 | 1.2956 | 0.0423  | 4.1633  |
| paternal age                  | 0.9773    | 0.9605 | 0.9944 | 0.0088 | -2.5897 | 0.0096  |
| maternal age                  | 0.9775    | 0.9584 | 0.9970 | 0.0100 | -2.2489 | 0.0245  |
| gestation length              | 0.9976    | 0.9841 | 1.0113 | 0.0069 | -0.3386 | 0.7348  |
| maternal bleeding             | 1.0580    | 1.0086 | 1.1098 | 0.0243 | 2.3147  | 0.0206  |
| fetal oxygen deprivation      | 1.1542    | 0.8989 | 1.4820 | 0.1275 | 1.1243  | 0.2608  |
| pregnancy oedema              | 1.0003    | 0.8981 | 1.1141 | 0.0549 | 0.0062  | 0.9950  |
| apgar5 score                  | 0.9801    | 0.9286 | 1.0343 | 0.0274 | -0.7304 | 0.4651  |
| birth weight                  | 1.0163    | 1.0034 | 1.0295 | 0.0065 | 2.4868  | 0.0128  |
| preexisting hypertension      | 0.8470    | 0.5918 | 1.2121 | 0.1828 | -0.9080 | 0.3638  |
| preexisting diabetes          | 1.0284    | 0.8214 | 1.2876 | 0.1146 | 0.2447  | 0.8066  |
| previous induced abortion     | 0.9972    | 0.9651 | 1.0303 | 0.0166 | -0.1656 | 0.8683  |
| previous spontaneous abortion | 1.0420    | 1.0066 | 1.0787 | 0.0176 | 2.3338  | 0.0196  |
| education level               | 1.0121    | 0.9971 | 1.0273 | 0.0075 | 1.5853  | 0.1128  |
| parental income               | 1.0249    | 1.0088 | 1.0413 | 0.0080 | 3.0484  | 0.0023  |
| country                       | 0.9226    | 0.8588 | 0.9912 | 0.0365 | -2.2005 | 0.0277  |
| region Sjælland               | 1.0989    | 1.0548 | 1.1449 | 0.0208 | 4.5164  | <0.0001 |
| region Syddanmark             | 1.2012    | 1.1592 | 1.2447 | 0.0181 | 10.1049 | <0.0001 |
| region Midtjylland            | 1.1515    | 1.1112 | 1.1933 | 0.0181 | 7.7536  | <0.0001 |
| region Nordjylland            | 0.9003    | 0.8581 | 0.9445 | 0.0244 | -4.2881 | <0.0001 |
| mother with disorder          | 1.2137    | 1.1791 | 1.2494 | 0.0147 | 13.1172 | <0.0001 |
| father with disorder          | 1.1925    | 1.1420 | 1.2453 | 0.0220 | 7.9773  | <0.0001 |

| 25. Circulatory - all         | exp(coef) | LCL    | UCL    | SE     | Z       | Pr(Z)   |
|-------------------------------|-----------|--------|--------|--------|---------|---------|
|                               | surgery   | 1.1121 | 0.9969 | 1.2407 | 0.0558  | 1.9046  |
| paternal age                  | 0.9728    | 0.9501 | 0.9961 | 0.0120 | -2.2772 | 0.0227  |
| maternal age                  | 0.9462    | 0.9211 | 0.9721 | 0.0137 | -4.0185 | <0.0001 |
| gestation length              | 0.9690    | 0.9509 | 0.9874 | 0.0095 | -3.2755 | 0.0010  |
| maternal bleeding             | 1.1394    | 1.0697 | 1.2136 | 0.0322 | 4.0526  | <0.0001 |
| fetal oxygen deprivation      | 0.8315    | 0.5654 | 1.2229 | 0.1968 | -0.9371 | 0.3486  |
| pregnancy oedema              | 1.0120    | 0.8785 | 1.1658 | 0.0721 | 0.1661  | 0.8680  |
| apgar5 score                  | 1.2349    | 1.1544 | 1.3209 | 0.0343 | 6.1392  | <0.0001 |
| birth weight                  | 0.9760    | 0.9589 | 0.9934 | 0.0090 | -2.6886 | 0.0071  |
| preexisting hypertension      | 1.1761    | 0.8152 | 1.6970 | 0.1870 | 0.8676  | 0.3855  |
| preexisting diabetes          | 0.9493    | 0.6974 | 1.2921 | 0.1573 | -0.3307 | 0.7408  |
| previous induced abortion     | 0.9829    | 0.9393 | 1.0285 | 0.0231 | -0.7436 | 0.4571  |
| previous spontaneous abortion | 1.0404    | 0.9917 | 1.0916 | 0.0244 | 1.6201  | 0.1052  |
| education level               | 0.9741    | 0.9544 | 0.9942 | 0.0104 | -2.5081 | 0.0121  |
| parental income               | 0.9792    | 0.9582 | 1.0007 | 0.0110 | -1.8948 | 0.0581  |
| country                       | 0.8924    | 0.8121 | 0.9806 | 0.0481 | -2.3651 | 0.0180  |
| region Sjælland               | 0.9897    | 0.9370 | 1.0454 | 0.0279 | -0.3682 | 0.7126  |
| region Syddanmark             | 0.9163    | 0.8723 | 0.9625 | 0.0251 | -3.4798 | 0.0005  |
| region Midtjylland            | 0.9554    | 0.9101 | 1.0029 | 0.0247 | -1.8413 | 0.0655  |
| region Nordjylland            | 0.7704    | 0.7214 | 0.8227 | 0.0334 | -7.7861 | <0.0001 |
| mother with disorder          | 1.4909    | 1.4270 | 1.5576 | 0.0223 | 17.8648 | <0.0001 |
| father with disorder          | 1.3222    | 1.2689 | 1.3777 | 0.0209 | 13.3130 | <0.0001 |

| 26. Nervous System - all      | exp(coef) | LCL    | UCL    | SE     | Z       | Pr(Z)   |
|-------------------------------|-----------|--------|--------|--------|---------|---------|
|                               | surgery   | 1.3524 | 1.1959 | 1.5293 | 0.0627  | 4.8112  |
| paternal age                  | 0.9804    | 0.9521 | 1.0096 | 0.0149 | -1.3191 | 0.1871  |
| maternal age                  | 0.8900    | 0.8603 | 0.9208 | 0.0173 | -6.7132 | <0.0001 |
| gestation length              | 0.9920    | 0.9687 | 1.0160 | 0.0121 | -0.6543 | 0.5129  |
| maternal bleeding             | 1.1314    | 1.0441 | 1.2260 | 0.0409 | 3.0149  | 0.0025  |
| fetal oxygen deprivation      | 1.5102    | 1.0471 | 2.1782 | 0.1868 | 2.2065  | 0.0273  |
| pregnancy oedema              | 1.1832    | 1.0098 | 1.3865 | 0.0808 | 2.0807  | 0.0374  |
| apgar5 score                  | 1.0732    | 0.9799 | 1.1755 | 0.0464 | 1.5231  | 0.1277  |
| birth weight                  | 0.9768    | 0.9553 | 0.9988 | 0.0113 | -2.0651 | 0.0389  |
| preexisting hypertension      | 1.0825    | 0.6139 | 1.9085 | 0.2893 | 0.2740  | 0.7840  |
| preexisting diabetes          | 1.4650    | 1.0485 | 2.0469 | 0.1706 | 2.2380  | 0.0252  |
| previous induced abortion     | 1.0664    | 1.0082 | 1.1279 | 0.0286 | 2.2463  | 0.0246  |
| previous spontaneous abortion | 1.0933    | 1.0300 | 1.1606 | 0.0304 | 2.9303  | 0.0033  |
| education level               | 0.9016    | 0.8787 | 0.9251 | 0.0131 | -7.8894 | <0.0001 |
| parental income               | 0.9399    | 0.9145 | 0.9661 | 0.0139 | -4.4255 | <0.0001 |
| country                       | 0.6862    | 0.6027 | 0.7813 | 0.0661 | -5.6882 | <0.0001 |
| region Sjælland               | 1.3932    | 1.3035 | 1.4890 | 0.0339 | 9.7673  | <0.0001 |
| region Syddanmark             | 1.1524    | 1.0828 | 1.2265 | 0.0317 | 4.4642  | <0.0001 |
| region Midtjylland            | 0.9780    | 0.9166 | 1.0434 | 0.0330 | -0.6726 | 0.5011  |
| region Nordjylland            | 0.7574    | 0.6935 | 0.8272 | 0.0449 | -6.1784 | <0.0001 |
| mother with disorder          | 1.5697    | 1.4651 | 1.6818 | 0.0351 | 12.8151 | <0.0001 |
| father with disorder          | 1.4063    | 1.2917 | 1.5311 | 0.0433 | 7.8650  | <0.0001 |

| 27. Eye/adnexa - all          | exp(coef) | LCL    | UCL    | SE     | Z        | Pr(Z)   |
|-------------------------------|-----------|--------|--------|--------|----------|---------|
|                               | surgery   | 1.3439 | 1.2057 | 1.4980 | 0.0553   | 5.3374  |
| paternal age                  | 1.0036    | 0.9883 | 1.0191 | 0.0078 | 0.4623   | 0.6438  |
| maternal age                  | 0.9761    | 0.9591 | 0.9935 | 0.0089 | -2.6837  | 0.0072  |
| gestation length              | 0.9557    | 0.9439 | 0.9677 | 0.0063 | -7.1251  | <0.0001 |
| maternal bleeding             | 1.0895    | 1.0440 | 1.1370 | 0.0217 | 3.9370   | <0.0001 |
| fetal oxygen deprivation      | 1.1580    | 0.9055 | 1.4810 | 0.1255 | 1.1691   | 0.2423  |
| pregnancy oedema              | 1.0570    | 0.9579 | 1.1664 | 0.0502 | 1.1039   | 0.2696  |
| apgar5 score                  | 1.0668    | 1.0179 | 1.1179 | 0.0239 | 2.7062   | 0.0068  |
| birth weight                  | 0.9580    | 0.9469 | 0.9693 | 0.0059 | -7.1712  | <0.0001 |
| preexisting hypertension      | 1.0174    | 0.7591 | 1.3635 | 0.1493 | 0.1157   | 0.9078  |
| preexisting diabetes          | 1.0961    | 0.9015 | 1.3329 | 0.0997 | 0.9206   | 0.3572  |
| previous induced abortion     | 1.0355    | 1.0057 | 1.0662 | 0.0149 | 2.3417   | 0.0191  |
| previous spontaneous abortion | 1.0649    | 1.0320 | 1.0988 | 0.0159 | 3.9337   | <0.0001 |
| education level               | 0.9582    | 0.9454 | 0.9711 | 0.0068 | -6.2411  | <0.0001 |
| parental income               | 0.9567    | 0.9431 | 0.9704 | 0.0072 | -6.0702  | <0.0001 |
| country                       | 1.0333    | 0.9785 | 1.0913 | 0.0278 | 1.1797   | 0.2381  |
| region Sjælland               | 0.7686    | 0.7414 | 0.7968 | 0.0183 | -14.3026 | <0.0001 |
| region Syddanmark             | 0.7535    | 0.7302 | 0.7775 | 0.0160 | -17.6485 | <0.0001 |
| region Midtjylland            | 0.6397    | 0.6192 | 0.6610 | 0.0166 | -26.8004 | <0.0001 |
| region Nordjylland            | 0.6694    | 0.6419 | 0.6980 | 0.0213 | -18.7850 | <0.0001 |
| mother with disorder          | 1.3313    | 1.2831 | 1.3814 | 0.0188 | 15.1965  | <0.0001 |
| father with disorder          | 1.2361    | 1.1901 | 1.2838 | 0.0193 | 10.9628  | <0.0001 |

| 28. Mental - all              | exp(coef) | LCL    | UCL    | SE     | Z        | Pr(Z)   |
|-------------------------------|-----------|--------|--------|--------|----------|---------|
|                               | surgery   | 1.1956 | 1.1306 | 1.2644 | 0.0285   | 6.2604  |
| paternal age                  | 1.0122    | 1.0007 | 1.0239 | 0.0058 | 2.0859   | 0.0369  |
| maternal age                  | 0.9184    | 0.9061 | 0.9308 | 0.0068 | -12.3935 | <0.0001 |
| gestation length              | 0.9811    | 0.9717 | 0.9906 | 0.0049 | -3.8751  | 0.0001  |
| maternal bleeding             | 1.1328    | 1.0971 | 1.1696 | 0.0163 | 7.6405   | <0.0001 |
| fetal oxygen deprivation      | 1.1972    | 0.9948 | 1.4407 | 0.0944 | 1.9052   | 0.0567  |
| pregnancy oedema              | 1.0729    | 0.9953 | 1.1566 | 0.0383 | 1.8385   | 0.0659  |
| apgar5 score                  | 1.0600    | 1.0219 | 1.0995 | 0.0186 | 3.1251   | 0.0017  |
| birth weight                  | 0.9718    | 0.9630 | 0.9807 | 0.0046 | -6.1335  | <0.0001 |
| preexisting hypertension      | 1.1690    | 0.9421 | 1.4505 | 0.1100 | 1.4188   | 0.1559  |
| preexisting diabetes          | 1.0875    | 0.9378 | 1.2611 | 0.0755 | 1.1106   | 0.2667  |
| previous induced abortion     | 1.1292    | 1.1049 | 1.1541 | 0.0111 | 10.9336  | <0.0001 |
| previous spontaneous abortion | 1.0701    | 1.0443 | 1.0965 | 0.0124 | 5.4413   | <0.0001 |
| education level               | 0.9607    | 0.9505 | 0.9710 | 0.0054 | -7.3597  | <0.0001 |
| parental income               | 0.7863    | 0.7774 | 0.7953 | 0.0058 | -41.1905 | <0.0001 |
| country                       | 0.4847    | 0.4597 | 0.5111 | 0.0270 | -26.7723 | <0.0001 |
| region Sjælland               | 0.8470    | 0.8234 | 0.8713 | 0.0144 | -11.5155 | <0.0001 |
| region Syddanmark             | 0.9173    | 0.8954 | 0.9396 | 0.0122 | -7.0261  | <0.0001 |
| region Midtjylland            | 0.7687    | 0.7493 | 0.7885 | 0.0129 | -20.2398 | <0.0001 |
| region Nordjylland            | 0.5602    | 0.5402 | 0.5811 | 0.0186 | -31.1175 | <0.0001 |
| mother with disorder          | 2.0378    | 1.9897 | 2.0871 | 0.0121 | 58.4125  | <0.0001 |
| father with disorder          | 1.6307    | 1.5853 | 1.6775 | 0.0144 | 33.9188  | <0.0001 |

**Table S7 - Full Cox regression outputs - impact of adenotonsillectomy on risk of later disease.**

| 1. Infectious/parasitic - all | exp(coef) | LCL    | UCL    | SE     | Z        | Pr(Z)   |
|-------------------------------|-----------|--------|--------|--------|----------|---------|
|                               | surgery   | 1.1771 | 1.1080 | 1.2505 | 0.0308   | 5.2852  |
| paternal age                  | 0.9953    | 0.9816 | 1.0091 | 0.0070 | -0.6677  | 0.5042  |
| maternal age                  | 0.9702    | 0.9550 | 0.9858 | 0.0080 | -3.7259  | 0.0001  |
| gestation length              | 0.9896    | 0.9787 | 1.0007 | 0.0056 | -1.8208  | 0.0686  |
| maternal bleeding             | 1.1192    | 1.0773 | 1.1628 | 0.0194 | 5.7807   | <0.0001 |
| fetal oxygen deprivation      | 0.8632    | 0.6697 | 1.1125 | 0.1294 | -1.1361  | 0.2559  |
| pregnancy oedema              | 1.0653    | 0.9742 | 1.1649 | 0.0455 | 1.3888   | 0.1648  |
| apgar5 score                  | 1.0487    | 1.0048 | 1.0946 | 0.0218 | 2.1792   | 0.0293  |
| birth weight                  | 0.9941    | 0.9838 | 1.0046 | 0.0053 | -1.0977  | 0.2723  |
| preexisting hypertension      | 0.9798    | 0.7500 | 1.2799 | 0.1363 | -0.1494  | 0.8811  |
| preexisting diabetes          | 1.0066    | 0.8394 | 1.2071 | 0.0926 | 0.0717   | 0.9428  |
| previous induced abortion     | 1.0968    | 1.0690 | 1.1252 | 0.0130 | 7.0702   | <0.0001 |
| previous spontaneous abortion | 1.0436    | 1.0147 | 1.0733 | 0.0143 | 2.9790   | 0.0028  |
| education level               | 0.9911    | 0.9793 | 1.0031 | 0.0061 | -1.4516  | 0.1465  |
| parental income               | 0.9868    | 0.9743 | 0.9995 | 0.0065 | -2.0335  | 0.0419  |
| country                       | 1.2756    | 1.2171 | 1.3368 | 0.0239 | 10.1711  | <0.0001 |
| region Sjælland               | 0.7852    | 0.7605 | 0.8107 | 0.0162 | -14.8414 | <0.0001 |
| region Syddanmark             | 0.6859    | 0.6664 | 0.7060 | 0.0146 | -25.6594 | <0.0001 |
| region Midtjylland            | 0.7030    | 0.6834 | 0.7231 | 0.0144 | -24.4581 | <0.0001 |
| region Nordjylland            | 0.6169    | 0.5936 | 0.6411 | 0.0196 | -24.5919 | <0.0001 |
| mother with disorder          | 1.3806    | 1.3373 | 1.4254 | 0.0162 | 19.8202  | <0.0001 |
| father with disorder          | 1.2319    | 1.1911 | 1.2740 | 0.0171 | 12.1469  | <0.0001 |

| 2. Allergic - all             | exp(coef) | LCL    | UCL    | SE     | Z        | Pr(Z)   |
|-------------------------------|-----------|--------|--------|--------|----------|---------|
|                               | surgery   | 1.2042 | 1.1049 | 1.3125 | 0.0439   | 4.2314  |
| paternal age                  | 1.0015    | 0.9812 | 1.0222 | 0.0104 | 0.1451   | 0.8845  |
| maternal age                  | 1.0292    | 1.0055 | 1.0535 | 0.0118 | 2.4265   | 0.0152  |
| gestation length              | 0.9928    | 0.9769 | 1.0089 | 0.0082 | -0.8785  | 0.3796  |
| maternal bleeding             | 1.1314    | 1.0709 | 1.1952 | 0.0280 | 4.4082   | <0.0001 |
| fetal oxygen deprivation      | 0.6066    | 0.3866 | 0.9519 | 0.2298 | -2.1741  | 0.0296  |
| pregnancy oedema              | 1.2399    | 1.0979 | 1.4003 | 0.0620 | 3.4659   | 0.0005  |
| apgar5 score                  | 1.0841    | 1.0211 | 1.1511 | 0.0305 | 2.6437   | 0.0081  |
| birth weight                  | 0.9783    | 0.9635 | 0.9934 | 0.0077 | -2.8059  | 0.0050  |
| preexisting hypertension      | 0.7466    | 0.4813 | 1.1580 | 0.2239 | -1.3046  | 0.1920  |
| preexisting diabetes          | 1.0876    | 0.8375 | 1.4123 | 0.1333 | 0.6300   | 0.5286  |
| previous induced abortion     | 1.0345    | 0.9957 | 1.0748 | 0.0194 | 1.7436   | 0.0812  |
| previous spontaneous abortion | 1.0488    | 1.0066 | 1.0928 | 0.0209 | 2.2762   | 0.0228  |
| education level               | 1.0639    | 1.0453 | 1.0829 | 0.0090 | 6.8756   | <0.0001 |
| parental income               | 1.0197    | 1.0008 | 1.0391 | 0.0095 | 2.0445   | 0.0408  |
| country                       | 1.3837    | 1.2903 | 1.4840 | 0.0356 | 9.1027   | <0.0001 |
| region Sjælland               | 0.6975    | 0.6628 | 0.7341 | 0.0260 | -13.8274 | <0.0001 |
| region Syddanmark             | 1.0294    | 0.9893 | 1.0711 | 0.0202 | 1.4324   | 0.1520  |
| region Midtjylland            | 0.7763    | 0.7442 | 0.8097 | 0.0215 | -11.7692 | <0.0001 |
| region Nordjylland            | 0.7079    | 0.6688 | 0.7493 | 0.0290 | -11.9081 | <0.0001 |
| mother with disorder          | 1.8689    | 1.7501 | 1.9957 | 0.0335 | 18.6651  | <0.0001 |
| father with disorder          | 1.7588    | 1.6203 | 1.9091 | 0.0418 | 13.4972  | <0.0001 |

| 3. Allergic - rhinitis        | exp(coef) | LCL    | UCL    | SE     | Z       | Pr(Z)   |
|-------------------------------|-----------|--------|--------|--------|---------|---------|
|                               | surgery   | 1.2474 | 1.1082 | 1.4041 | 0.0603  | 3.6636  |
| paternal age                  | 1.0147    | 0.9855 | 1.0447 | 0.0148 | 0.9828  | 0.3256  |
| maternal age                  | 1.0653    | 1.0307 | 1.1011 | 0.0168 | 3.7532  | 0.0001  |
| gestation length              | 0.9957    | 0.9735 | 1.0183 | 0.0114 | -0.3731 | 0.7090  |
| maternal bleeding             | 1.0652    | 0.9838 | 1.1534 | 0.0405 | 1.5592  | 0.1189  |
| fetal oxygen deprivation      | 0.5600    | 0.2910 | 1.0776 | 0.3339 | -1.7360 | 0.0825  |
| pregnancy oedema              | 1.2134    | 1.0200 | 1.4434 | 0.0885 | 2.1845  | 0.0289  |
| apgar5 score                  | 1.1074    | 1.0198 | 1.2026 | 0.0420 | 2.4267  | 0.0152  |
| birth weight                  | 0.9851    | 0.9642 | 1.0065 | 0.0109 | -1.3657 | 0.1720  |
| preexisting hypertension      | 0.7307    | 0.3928 | 1.3594 | 0.3166 | -0.9903 | 0.3220  |
| preexisting diabetes          | 0.8232    | 0.5409 | 1.2528 | 0.2142 | -0.9076 | 0.3640  |
| previous induced abortion     | 1.0001    | 0.9466 | 1.0566 | 0.0280 | 0.0044  | 0.9964  |
| previous spontaneous abortion | 1.0349    | 0.9764 | 1.0968 | 0.0296 | 1.1575  | 0.2470  |
| education level               | 1.1292    | 1.1011 | 1.1580 | 0.0128 | 9.4542  | <0.0001 |
| parental income               | 1.0263    | 0.9990 | 1.0543 | 0.0137 | 1.8941  | 0.0582  |
| country                       | 1.4283    | 1.2857 | 1.5868 | 0.0536 | 6.6430  | <0.0001 |
| region Sjælland               | 0.8852    | 0.8192 | 0.9565 | 0.0395 | -3.0854 | 0.0020  |
| region Syddanmark             | 1.7586    | 1.6603 | 1.8628 | 0.0293 | 19.2333 | <0.0001 |
| region Midtjylland            | 1.0976    | 1.0308 | 1.1688 | 0.0320 | 2.9074  | 0.0036  |
| region Nordjylland            | 1.2889    | 1.1952 | 1.3901 | 0.0385 | 6.5873  | <0.0001 |
| mother with disorder          | 3.2098    | 2.8646 | 3.5967 | 0.0580 | 20.0863 | <0.0001 |
| father with disorder          | 2.8043    | 2.4399 | 3.2232 | 0.0710 | 14.5180 | <0.0001 |

| 4. Allergic - conjunctivitis  | exp(coef) | LCL    | UCL    | SE       | Z       | Pr(Z)   |
|-------------------------------|-----------|--------|--------|----------|---------|---------|
|                               | surgery   | 1.3613 | 1.0700 | 1.7321   | 0.1228  | 2.5105  |
| paternal age                  | 1.0121    | 0.9516 | 1.0763 | 0.0314   | 0.3833  | 0.7014  |
| maternal age                  | 1.0623    | 0.9905 | 1.1393 | 0.0357   | 1.6934  | 0.0903  |
| gestation length              | 1.0211    | 0.9736 | 1.0709 | 0.0242   | 0.8606  | 0.3894  |
| maternal bleeding             | 1.2102    | 1.0309 | 1.4206 | 0.0817   | 2.3328  | 0.0196  |
| fetal oxygen deprivation      | 0.0000    | 0.0000 | Inf    | 370.7101 | -0.0344 | 0.9725  |
| pregnancy oedema              | 1.4491    | 1.0246 | 2.0495 | 0.1768   | 2.0974  | 0.0359  |
| apgar5 score                  | 1.0475    | 0.8776 | 1.2502 | 0.0902   | 0.5142  | 0.6071  |
| birth weight                  | 1.0077    | 0.9627 | 1.0548 | 0.0233   | 0.3318  | 0.7400  |
| preexisting hypertension      | 0.6319    | 0.1577 | 2.5318 | 0.7081   | -0.6481 | 0.5169  |
| preexisting diabetes          | 1.1978    | 0.5680 | 2.5261 | 0.3806   | 0.4742  | 0.6353  |
| previous induced abortion     | 1.0707    | 0.9551 | 1.2002 | 0.0582   | 1.1730  | 0.2407  |
| previous spontaneous abortion | 1.1493    | 1.0198 | 1.2953 | 0.0610   | 2.2812  | 0.0225  |
| education level               | 1.0637    | 1.0082 | 1.1223 | 0.0273   | 2.2595  | 0.0238  |
| parental income               | 1.0372    | 0.9791 | 1.0988 | 0.0294   | 1.2443  | 0.2133  |
| country                       | 1.5300    | 1.2440 | 1.8817 | 0.1055   | 4.0288  | <0.0001 |
| region Sjælland               | 0.6452    | 0.5421 | 0.7679 | 0.0888   | -4.9314 | <0.0001 |
| region Syddanmark             | 1.8996    | 1.6943 | 2.1297 | 0.0583   | 10.9978 | <0.0001 |
| region Midtjylland            | 0.6906    | 0.5975 | 0.7982 | 0.0739   | -5.0081 | <0.0001 |
| region Nordjylland            | 0.9974    | 0.8439 | 1.1788 | 0.0852   | -0.0296 | 0.9763  |
| mother with disorder          | 1.8907    | 0.9436 | 3.7884 | 0.3545   | 1.7962  | 0.0724  |
| father with disorder          | 2.8409    | 1.3513 | 5.9726 | 0.3791   | 2.7541  | 0.0058  |

| 5. Allergic - eczema/dermatitis | exp(coef) | LCL    | UCL    | SE     | Z        | Pr(Z)   |
|---------------------------------|-----------|--------|--------|--------|----------|---------|
|                                 | surgery   | 1.1687 | 0.9881 | 1.3824 | 0.0856   | 1.8209  |
| paternal age                    | 0.9864    | 0.9487 | 1.0256 | 0.0198 | -0.6867  | 0.4922  |
| maternal age                    | 1.0039    | 0.9603 | 1.0496 | 0.0226 | 0.1757   | 0.8605  |
| gestation length                | 1.0206    | 0.9897 | 1.0524 | 0.0156 | 1.3021   | 0.1928  |
| maternal bleeding               | 1.2050    | 1.0880 | 1.3346 | 0.0521 | 3.5794   | 0.0003  |
| fetal oxygen deprivation        | 0.6867    | 0.3079 | 1.5313 | 0.4091 | -0.9184  | 0.3583  |
| pregnancy oedema                | 1.3291    | 1.0626 | 1.6626 | 0.1142 | 2.4916   | 0.0127  |
| apgar5 score                    | 1.0432    | 0.9276 | 1.1733 | 0.0599 | 0.7069   | 0.4795  |
| birth weight                    | 0.9868    | 0.9585 | 1.0159 | 0.0148 | -0.8910  | 0.3729  |
| preexisting hypertension        | 0.6868    | 0.2855 | 1.6522 | 0.4478 | -0.8387  | 0.4016  |
| preexisting diabetes            | 1.2062    | 0.7474 | 1.9468 | 0.2442 | 0.7679   | 0.4425  |
| previous induced abortion       | 1.0715    | 0.9976 | 1.1509 | 0.0364 | 1.8953   | 0.0580  |
| previous spontaneous abortion   | 1.0733    | 0.9933 | 1.1598 | 0.0395 | 1.7906   | 0.0733  |
| education level                 | 1.0392    | 1.0049 | 1.0747 | 0.0171 | 2.2455   | 0.0247  |
| parental income                 | 1.0477    | 1.0110 | 1.0856 | 0.0181 | 2.5668   | 0.0102  |
| country                         | 1.2562    | 1.0965 | 1.4392 | 0.0693 | 3.2881   | 0.0010  |
| region Sjælland                 | 0.6011    | 0.5451 | 0.6628 | 0.0498 | -10.2037 | <0.0001 |
| region Syddanmark               | 0.8992    | 0.8344 | 0.9689 | 0.0381 | -2.7878  | 0.0053  |
| region Midtjylland              | 0.7870    | 0.7291 | 0.8496 | 0.0390 | -6.1351  | <0.0001 |
| region Nordjylland              | 0.3941    | 0.3458 | 0.4491 | 0.0667 | -13.9580 | <0.0001 |
| mother with disorder            | 2.4378    | 2.0254 | 2.9341 | 0.0945 | 9.4239   | <0.0001 |
| father with disorder            | 1.9400    | 1.4552 | 2.5863 | 0.1467 | 4.5171   | <0.0001 |

| 6. Allergic - urticaria/angiodema | exp(coef) | LCL    | UCL    | SE     | Z        | Pr(Z)   |
|-----------------------------------|-----------|--------|--------|--------|----------|---------|
|                                   | surgery   | 1.1812 | 0.9985 | 1.3973 | 0.0857   | 1.9434  |
| paternal age                      | 1.0045    | 0.9664 | 1.0442 | 0.0197 | 0.2307   | 0.8174  |
| maternal age                      | 0.9836    | 0.9408 | 1.0282 | 0.0226 | -0.7287  | 0.4661  |
| gestation length                  | 0.9829    | 0.9526 | 1.0141 | 0.0159 | -1.0795  | 0.2803  |
| maternal bleeding                 | 1.2430    | 1.1229 | 1.3759 | 0.0518 | 4.1974   | <0.0001 |
| fetal oxygen deprivation          | 0.5339    | 0.2000 | 1.4249 | 0.5008 | -1.2529  | 0.2102  |
| pregnancy oedema                  | 1.5137    | 1.2253 | 1.8701 | 0.1078 | 3.8445   | 0.0001  |
| apgar5 score                      | 1.0982    | 0.9778 | 1.2334 | 0.0592 | 1.5820   | 0.1136  |
| birth weight                      | 0.9722    | 0.9438 | 1.0015 | 0.0151 | -1.8602  | 0.0628  |
| preexisting hypertension          | 0.7050    | 0.2929 | 1.6967 | 0.4480 | -0.7799  | 0.4354  |
| preexisting diabetes              | 1.3536    | 0.8602 | 2.1298 | 0.2312 | 1.3093   | 0.1904  |
| previous induced abortion         | 1.0644    | 0.9899 | 1.1444 | 0.0369 | 1.6881   | 0.0913  |
| previous spontaneous abortion     | 1.0504    | 0.9705 | 1.1370 | 0.0403 | 1.2188   | 0.2229  |
| education level                   | 1.0342    | 0.9998 | 1.0696 | 0.0172 | 1.9540   | 0.0506  |
| parental income                   | 0.9719    | 0.9379 | 1.0072 | 0.0181 | -1.5631  | 0.1180  |
| country                           | 1.4708    | 1.3033 | 1.6598 | 0.0616 | 6.2550   | <0.0001 |
| region Sjælland                   | 0.5977    | 0.5454 | 0.6551 | 0.0467 | -11.0020 | <0.0001 |
| region Syddanmark                 | 0.6426    | 0.5950 | 0.6941 | 0.0392 | -11.2509 | <0.0001 |
| region Midtjylland                | 0.4909    | 0.4518 | 0.5333 | 0.0423 | -16.8068 | <0.0001 |
| region Nordjylland                | 0.3534    | 0.3111 | 0.4014 | 0.0650 | -15.9940 | <0.0001 |
| mother with disorder              | 1.9059    | 1.5657 | 2.3202 | 0.1003 | 6.4283   | <0.0001 |
| father with disorder              | 1.4106    | 1.0672 | 1.8646 | 0.1423 | 2.4168   | 0.0156  |

| 7. Skin - all                 | exp(coef) | LCL    | UCL    | SE     | Z        | Pr(Z)   |
|-------------------------------|-----------|--------|--------|--------|----------|---------|
|                               | surgery   | 1.2834 | 1.2235 | 1.3462 | 0.0243   | 10.2405 |
| paternal age                  | 0.9930    | 0.9815 | 1.0046 | 0.0059 | -1.1796  | 0.2381  |
| maternal age                  | 0.9498    | 0.9372 | 0.9626 | 0.0068 | -7.5213  | <0.0001 |
| gestation length              | 0.9975    | 0.9882 | 1.0068 | 0.0047 | -0.5215  | 0.6019  |
| maternal bleeding             | 1.0672    | 1.0331 | 1.1025 | 0.0165 | 3.9223   | <0.0001 |
| fetal oxygen deprivation      | 0.8423    | 0.6870 | 1.0329 | 0.1040 | -1.6487  | 0.0992  |
| pregnancy oedema              | 1.1287    | 1.0515 | 1.2114 | 0.0361 | 3.3529   | 0.0007  |
| apgar5 score                  | 1.0966    | 1.0587 | 1.1357 | 0.0179 | 5.1493   | <0.0001 |
| birth weight                  | 1.0237    | 1.0147 | 1.0328 | 0.0045 | 5.2101   | <0.0001 |
| preexisting hypertension      | 1.0193    | 0.8149 | 1.2751 | 0.1142 | 0.1681   | 0.8664  |
| preexisting diabetes          | 1.1840    | 1.0303 | 1.3607 | 0.0709 | 2.3809   | 0.0172  |
| previous induced abortion     | 1.0865    | 1.0630 | 1.1104 | 0.0111 | 7.4543   | <0.0001 |
| previous spontaneous abortion | 1.0451    | 1.0204 | 1.0704 | 0.0122 | 3.6170   | 0.0002  |
| education level               | 0.9641    | 0.9543 | 0.9739 | 0.0051 | -7.0552  | <0.0001 |
| parental income               | 0.9681    | 0.9576 | 0.9786 | 0.0055 | -5.8508  | <0.0001 |
| country                       | 1.2951    | 1.2449 | 1.3473 | 0.0201 | 12.8258  | <0.0001 |
| region Sjælland               | 0.7942    | 0.7722 | 0.8168 | 0.0143 | -16.0742 | <0.0001 |
| region Syddanmark             | 0.8635    | 0.8431 | 0.8844 | 0.0122 | -12.0255 | <0.0001 |
| region Midtjylland            | 0.8484    | 0.8285 | 0.8688 | 0.0121 | -13.5722 | <0.0001 |
| region Nordjylland            | 0.5890    | 0.5689 | 0.6098 | 0.0177 | -29.8768 | <0.0001 |
| mother with disorder          | 1.3364    | 1.3035 | 1.3700 | 0.0126 | 22.8440  | <0.0001 |
| father with disorder          | 1.2905    | 1.2579 | 1.3239 | 0.0130 | 19.5323  | <0.0001 |

| 8. Autoimmune - all           | exp(coef) | LCL    | UCL    | SE     | Z       | Pr(Z)   |
|-------------------------------|-----------|--------|--------|--------|---------|---------|
|                               | surgery   | 1.1764 | 1.0916 | 1.2677 | 0.0381  | 4.2595  |
| paternal age                  | 0.9849    | 0.9677 | 1.0024 | 0.0090 | -1.6869 | 0.0916  |
| maternal age                  | 0.9701    | 0.9507 | 0.9899 | 0.0103 | -2.9426 | 0.0032  |
| gestation length              | 0.9924    | 0.9786 | 1.0063 | 0.0071 | -1.0669 | 0.2859  |
| maternal bleeding             | 1.0878    | 1.0363 | 1.1417 | 0.0247 | 3.4064  | 0.0006  |
| fetal oxygen deprivation      | 1.0539    | 0.7933 | 1.3999 | 0.1448 | 0.3624  | 0.7170  |
| pregnancy oedema              | 1.2427    | 1.1218 | 1.3768 | 0.0522 | 4.1593  | <0.0001 |
| apgar5 score                  | 0.9829    | 0.9306 | 1.0382 | 0.0279 | -0.6155 | 0.5381  |
| birth weight                  | 0.9945    | 0.9815 | 1.0077 | 0.0067 | -0.8113 | 0.4171  |
| preexisting hypertension      | 1.0277    | 0.7472 | 1.4136 | 0.1626 | 0.1684  | 0.8662  |
| preexisting diabetes          | 1.5506    | 1.3125 | 1.8318 | 0.0850 | 5.1579  | <0.0001 |
| previous induced abortion     | 0.9700    | 0.9379 | 1.0033 | 0.0171 | -1.7678 | 0.0770  |
| previous spontaneous abortion | 1.0443    | 1.0079 | 1.0820 | 0.0181 | 2.3953  | 0.0166  |
| education level               | 0.9910    | 0.9759 | 1.0063 | 0.0078 | -1.1541 | 0.2484  |
| parental income               | 1.0127    | 0.9963 | 1.0294 | 0.0083 | 1.5202  | 0.1284  |
| country                       | 0.9092    | 0.8484 | 0.9743 | 0.0352 | -2.6954 | 0.0070  |
| region Sjælland               | 0.9706    | 0.9317 | 1.0112 | 0.0209 | -1.4233 | 0.1546  |
| region Syddanmark             | 0.9822    | 0.9475 | 1.0183 | 0.0183 | -0.9721 | 0.3309  |
| region Midtjylland            | 0.9145    | 0.8819 | 0.9483 | 0.0185 | -4.8282 | <0.0001 |
| region Nordjylland            | 0.7812    | 0.7440 | 0.8202 | 0.0248 | -9.9344 | <0.0001 |
| mother with disorder          | 1.5423    | 1.4811 | 1.6060 | 0.0206 | 20.9806 | <0.0001 |
| father with disorder          | 1.4493    | 1.3888 | 1.5124 | 0.0217 | 17.0605 | <0.0001 |

| 9. Respiratory - all          | exp(coef) | LCL    | UCL    | SE     | Z        | Pr(Z)   |
|-------------------------------|-----------|--------|--------|--------|----------|---------|
|                               | surgery   | 1.3680 | 0.5690 | 3.2885 | 0.4475   | 0.7002  |
| paternal age                  | 0.9997    | 0.9878 | 1.0117 | 0.0060 | -0.0445  | 0.9644  |
| maternal age                  | 0.9595    | 0.9464 | 0.9728 | 0.0070 | -5.8898  | <0.0001 |
| gestation length              | 0.9853    | 0.9759 | 0.9949 | 0.0049 | -2.9932  | 0.0027  |
| maternal bleeding             | 1.0836    | 1.0476 | 1.1208 | 0.0172 | 4.6590   | <0.0001 |
| fetal oxygen deprivation      | 0.9175    | 0.7403 | 1.1370 | 0.1094 | -0.7862  | 0.4317  |
| pregnancy oedema              | 1.1045    | 1.0236 | 1.1919 | 0.0388 | 2.5613   | 0.0104  |
| apgar5 score                  | 1.0521    | 1.0139 | 1.0916 | 0.0188 | 2.6968   | 0.0070  |
| birth weight                  | 1.0013    | 0.9923 | 1.0103 | 0.0046 | 0.2831   | 0.7770  |
| preexisting hypertension      | 1.1655    | 0.9418 | 1.4424 | 0.1087 | 1.4090   | 0.1588  |
| preexisting diabetes          | 1.0093    | 0.8610 | 1.1833 | 0.0811 | 0.1153   | 0.9081  |
| previous induced abortion     | 1.0563    | 1.0327 | 1.0803 | 0.0114 | 4.7662   | <0.0001 |
| previous spontaneous abortion | 1.0331    | 1.0081 | 1.0587 | 0.0124 | 2.6138   | 0.0089  |
| education level               | 1.0008    | 0.9905 | 1.0112 | 0.0052 | 0.1600   | 0.8728  |
| parental income               | 0.9741    | 0.9633 | 0.9850 | 0.0056 | -4.6199  | <0.0001 |
| country                       | 1.2267    | 1.1768 | 1.2787 | 0.0211 | 9.6433   | <0.0001 |
| region Sjælland               | 0.8107    | 0.7880 | 0.8342 | 0.0145 | -14.4274 | <0.0001 |
| region Syddanmark             | 0.8774    | 0.8563 | 0.8989 | 0.0123 | -10.5551 | <0.0001 |
| region Midtjylland            | 0.7362    | 0.7181 | 0.7548 | 0.0127 | -24.0740 | <0.0001 |
| region Nordjylland            | 0.7288    | 0.7056 | 0.7528 | 0.0165 | -19.1648 | <0.0001 |
| mother with disorder          | 1.3300    | 1.3016 | 1.3590 | 0.0110 | 25.9046  | <0.0001 |
| father with disorder          | 1.2410    | 1.2143 | 1.2683 | 0.0111 | 19.4381  | <0.0001 |

| 10. Respiratory - upper       | exp(coef) | LCL    | UCL    | SE     | Z        | Pr(Z)   |
|-------------------------------|-----------|--------|--------|--------|----------|---------|
|                               | surgery   | 1.7428 | 0.7248 | 4.1902 | 0.4475   | 1.2410  |
| paternal age                  | 1.0016    | 0.9869 | 1.0166 | 0.0075 | 0.2207   | 0.8252  |
| maternal age                  | 0.9666    | 0.9503 | 0.9832 | 0.0086 | -3.9001  | <0.0001 |
| gestation length              | 0.9926    | 0.9809 | 1.0044 | 0.0060 | -1.2232  | 0.2212  |
| maternal bleeding             | 1.0773    | 1.0335 | 1.1230 | 0.0211 | 3.5192   | 0.0004  |
| fetal oxygen deprivation      | 0.8366    | 0.6318 | 1.1079 | 0.1432 | -1.2446  | 0.2132  |
| pregnancy oedema              | 1.1358    | 1.0352 | 1.2461 | 0.0472 | 2.6934   | 0.0070  |
| apgar5 score                  | 1.0874    | 1.0399 | 1.1370 | 0.0227 | 3.6786   | 0.0002  |
| birth weight                  | 1.0024    | 0.9912 | 1.0136 | 0.0056 | 0.4238   | 0.6716  |
| preexisting hypertension      | 1.1318    | 0.8663 | 1.4786 | 0.1363 | 0.9080   | 0.3638  |
| preexisting diabetes          | 0.9440    | 0.7703 | 1.1569 | 0.1037 | -0.5548  | 0.5790  |
| previous induced abortion     | 1.0955    | 1.0658 | 1.1261 | 0.0140 | 6.4992   | <0.0001 |
| previous spontaneous abortion | 1.0321    | 1.0014 | 1.0637 | 0.0153 | 2.0536   | 0.0400  |
| education level               | 1.0127    | 0.9998 | 1.0258 | 0.0065 | 1.9369   | 0.0527  |
| parental income               | 0.9900    | 0.9765 | 1.0037 | 0.0070 | -1.4260  | 0.1538  |
| country                       | 1.4084    | 1.3405 | 1.4797 | 0.0252 | 13.5888  | <0.0001 |
| region Sjælland               | 0.8276    | 0.7990 | 0.8573 | 0.0179 | -10.5342 | <0.0001 |
| region Syddanmark             | 0.9349    | 0.9076 | 0.9631 | 0.0151 | -4.4406  | <0.0001 |
| region Midtjylland            | 0.7396    | 0.7170 | 0.7630 | 0.0158 | -19.0094 | <0.0001 |
| region Nordjylland            | 0.7003    | 0.6721 | 0.7297 | 0.0209 | -16.9806 | <0.0001 |
| mother with disorder          | 1.3807    | 1.3371 | 1.4258 | 0.0163 | 19.7127  | <0.0001 |
| father with disorder          | 1.2904    | 1.2479 | 1.3343 | 0.0170 | 14.9262  | <0.0001 |



| 11. Respiratory - lower       | exp(coef) | LCL    | UCL    | SE     | Z        | Pr(Z)   |
|-------------------------------|-----------|--------|--------|--------|----------|---------|
|                               | surgery   | 1.3809 | 1.2198 | 1.5632 | 0.0632   | 5.1000  |
| paternal age                  | 1.0049    | 0.9747 | 1.0359 | 0.0155 | 0.3159   | 0.7520  |
| maternal age                  | 0.9151    | 0.8833 | 0.9479 | 0.0180 | -4.9272  | <0.0001 |
| gestation length              | 0.9419    | 0.9187 | 0.9657 | 0.0127 | -4.7041  | <0.0001 |
| maternal bleeding             | 1.1484    | 1.0565 | 1.2483 | 0.0425 | 3.2534   | 0.0011  |
| fetal oxygen deprivation      | 0.8564    | 0.4855 | 1.5107 | 0.2895 | -0.5350  | 0.5926  |
| pregnancy oedema              | 1.1677    | 0.9686 | 1.4077 | 0.0953 | 1.6264   | 0.1038  |
| apgar5 score                  | 1.1110    | 1.0132 | 1.2182 | 0.0470 | 2.2398   | 0.0251  |
| birth weight                  | 0.9841    | 0.9613 | 1.0074 | 0.0119 | -1.3362  | 0.1814  |
| preexisting hypertension      | 1.1838    | 0.6862 | 2.0424 | 0.2782 | 0.6066   | 0.5440  |
| preexisting diabetes          | 1.3914    | 0.9908 | 1.9540 | 0.1732 | 1.9066   | 0.0565  |
| previous induced abortion     | 1.0042    | 0.9466 | 1.0653 | 0.0301 | 0.1414   | 0.8875  |
| previous spontaneous abortion | 1.1371    | 1.0687 | 1.2098 | 0.0316 | 4.0604   | <0.0001 |
| education level               | 0.9608    | 0.9353 | 0.9870 | 0.0137 | -2.9082  | 0.0036  |
| parental income               | 0.9273    | 0.9010 | 0.9544 | 0.0146 | -5.1420  | <0.0001 |
| country                       | 1.0764    | 0.9687 | 1.1960 | 0.0537 | 1.3689   | 0.1710  |
| region Sjælland               | 0.7781    | 0.7242 | 0.8360 | 0.0366 | -6.8495  | <0.0001 |
| region Syddanmark             | 0.7139    | 0.6698 | 0.7609 | 0.0325 | -10.3531 | <0.0001 |
| region Midtjylland            | 0.6391    | 0.5989 | 0.6821 | 0.0331 | -13.4845 | <0.0001 |
| region Nordjylland            | 0.6543    | 0.6017 | 0.7115 | 0.0427 | -9.9259  | <0.0001 |
| mother with disorder          | 1.5992    | 1.4573 | 1.7548 | 0.0473 | 9.9064   | <0.0001 |
| father with disorder          | 1.3706    | 1.2502 | 1.5025 | 0.0468 | 6.7224   | <0.0001 |

| 12. Respiratory - chronic lower | exp(coef) | LCL    | UCL    | SE     | Z        | Pr(Z)   |
|---------------------------------|-----------|--------|--------|--------|----------|---------|
|                                 | surgery   | 1.3345 | 1.2440 | 1.4316 | 0.0358   | 8.0575  |
| paternal age                    | 0.9974    | 0.9802 | 1.0149 | 0.0088 | -0.2869  | 0.7741  |
| maternal age                    | 0.9741    | 0.9547 | 0.9939 | 0.0102 | -2.5555  | 0.0106  |
| gestation length                | 0.9676    | 0.9543 | 0.9812 | 0.0071 | -4.6231  | <0.0001 |
| maternal bleeding               | 1.1185    | 1.0664 | 1.1731 | 0.0243 | 4.6080   | <0.0001 |
| fetal oxygen deprivation        | 0.9566    | 0.6893 | 1.3275 | 0.1671 | -0.2651  | 0.7908  |
| pregnancy oedema                | 1.1406    | 1.0184 | 1.2774 | 0.0577 | 2.2765   | 0.0228  |
| apgar5 score                    | 1.0680    | 1.0139 | 1.1250 | 0.0265 | 2.4821   | 0.0130  |
| birth weight                    | 0.9779    | 0.9650 | 0.9910 | 0.0067 | -3.2862  | 0.0010  |
| preexisting hypertension        | 0.8525    | 0.5991 | 1.2130 | 0.1799 | -0.8865  | 0.3753  |
| preexisting diabetes            | 0.9282    | 0.7345 | 1.1730 | 0.1194 | -0.6235  | 0.5329  |
| previous induced abortion       | 1.0202    | 0.9870 | 1.0546 | 0.0168 | 1.1869   | 0.2352  |
| previous spontaneous abortion   | 1.0575    | 1.0204 | 1.0959 | 0.0182 | 3.0718   | 0.0021  |
| education level                 | 1.0246    | 1.0088 | 1.0406 | 0.0079 | 3.0751   | 0.0021  |
| parental income                 | 0.9407    | 0.9253 | 0.9565 | 0.0084 | -7.2144  | <0.0001 |
| country                         | 0.9506    | 0.8916 | 1.0134 | 0.0326 | -1.5516  | 0.1207  |
| region Sjælland                 | 0.8152    | 0.7815 | 0.8504 | 0.0215 | -9.4759  | <0.0001 |
| region Syddanmark               | 0.9580    | 0.9246 | 0.9926 | 0.0180 | -2.3672  | 0.0179  |
| region Midtjylland              | 0.7450    | 0.7176 | 0.7734 | 0.0191 | -15.4054 | <0.0001 |
| region Nordjylland              | 0.8530    | 0.8146 | 0.8932 | 0.0234 | -6.7624  | <0.0001 |
| mother with disorder            | 1.9907    | 1.9012 | 2.0844 | 0.0234 | 29.3286  | <0.0001 |
| father with disorder            | 1.7636    | 1.6746 | 1.8572 | 0.0264 | 21.4886  | <0.0001 |

| 13. Respiratory - asthma      | exp(coef) | LCL    | UCL    | SE     | Z        | Pr(Z)   |
|-------------------------------|-----------|--------|--------|--------|----------|---------|
|                               | surgery   | 1.3467 | 1.2554 | 1.4447 | 0.0358   | 8.3104  |
| paternal age                  | 1.0065    | 0.9890 | 1.0243 | 0.0089 | 0.7311   | 0.4646  |
| maternal age                  | 0.9749    | 0.9553 | 0.9948 | 0.0103 | -2.4610  | 0.0138  |
| gestation length              | 0.9631    | 0.9497 | 0.9767 | 0.0071 | -5.2622  | <0.0001 |
| maternal bleeding             | 1.1258    | 1.0733 | 1.1809 | 0.0243 | 4.8678   | <0.0001 |
| fetal oxygen deprivation      | 0.9913    | 0.7175 | 1.3696 | 0.1649 | -0.0523  | 0.9582  |
| pregnancy oedema              | 1.1248    | 1.0027 | 1.2618 | 0.0586 | 2.0062   | 0.0448  |
| apgar5 score                  | 1.0684    | 1.0141 | 1.1256 | 0.0266 | 2.4863   | 0.0129  |
| birth weight                  | 0.9759    | 0.9630 | 0.9890 | 0.0068 | -3.5757  | 0.0003  |
| preexisting hypertension      | 0.8542    | 0.6004 | 1.2155 | 0.1799 | -0.8751  | 0.3814  |
| preexisting diabetes          | 0.9348    | 0.7397 | 1.1813 | 0.1194 | -0.5645  | 0.5724  |
| previous induced abortion     | 1.0223    | 0.9888 | 1.0569 | 0.0169 | 1.3022   | 0.1928  |
| previous spontaneous abortion | 1.0612    | 1.0238 | 1.1000 | 0.0183 | 3.2489   | 0.0011  |
| education level               | 1.0173    | 1.0016 | 1.0333 | 0.0079 | 2.1715   | 0.0298  |
| parental income               | 0.9348    | 0.9193 | 0.9505 | 0.0084 | -7.9282  | <0.0001 |
| country                       | 0.9293    | 0.8713 | 0.9912 | 0.0328 | -2.2287  | 0.0258  |
| region Sjælland               | 0.8159    | 0.7820 | 0.8513 | 0.0216 | -9.3841  | <0.0001 |
| region Syddanmark             | 0.9553    | 0.9218 | 0.9900 | 0.0182 | -2.5087  | 0.0121  |
| region Midtjylland            | 0.7483    | 0.7207 | 0.7770 | 0.0191 | -15.1170 | <0.0001 |
| region Nordjylland            | 0.8505    | 0.8120 | 0.8908 | 0.0236 | -6.8525  | <0.0001 |
| mother with disorder          | 2.1944    | 2.0867 | 2.3076 | 0.0256 | 30.6122  | <0.0001 |
| father with disorder          | 2.0570    | 1.9343 | 2.1875 | 0.0313 | 22.9828  | <0.0001 |

| 14. Respiratory - influenza   | exp(coef) | LCL    | UCL    | SE     | Z        | Pr(Z)   |
|-------------------------------|-----------|--------|--------|--------|----------|---------|
|                               | surgery   | 1.4457 | 1.1971 | 1.7459 | 0.0962   | 3.8297  |
| paternal age                  | 1.0206    | 0.9732 | 1.0703 | 0.0242 | 0.8427   | 0.3993  |
| maternal age                  | 0.9085    | 0.8594 | 0.9603 | 0.0283 | -3.3877  | 0.0007  |
| gestation length              | 0.9203    | 0.8844 | 0.9576 | 0.0202 | -4.0983  | <0.0001 |
| maternal bleeding             | 1.0844    | 0.9476 | 1.2410 | 0.0688 | 1.1780   | 0.2387  |
| fetal oxygen deprivation      | 1.9236    | 0.9968 | 3.7120 | 0.3353 | 1.9506   | 0.0510  |
| pregnancy oedema              | 1.4361    | 1.0835 | 1.9034 | 0.1437 | 2.5183   | 0.0117  |
| apgar5 score                  | 1.0914    | 0.9421 | 1.2645 | 0.0750 | 1.1661   | 0.2435  |
| birth weight                  | 0.9711    | 0.9352 | 1.0085 | 0.0192 | -1.5197  | 0.1285  |
| preexisting hypertension      | 2.7574    | 1.5588 | 4.8775 | 0.2909 | 3.4855   | 0.0004  |
| preexisting diabetes          | 1.1812    | 0.6671 | 2.0915 | 0.2914 | 0.5714   | 0.5676  |
| previous induced abortion     | 1.0048    | 0.9144 | 1.1042 | 0.0481 | 0.1007   | 0.9197  |
| previous spontaneous abortion | 1.0645    | 0.9619 | 1.1782 | 0.0517 | 1.2095   | 0.2264  |
| education level               | 0.9554    | 0.9159 | 0.9967 | 0.0215 | -2.1097  | 0.0348  |
| parental income               | 0.8900    | 0.8503 | 0.9317 | 0.0233 | -4.9894  | <0.0001 |
| country                       | 1.8900    | 1.6574 | 2.1553 | 0.0670 | 9.4994   | <0.0001 |
| region Sjælland               | 0.6863    | 0.6130 | 0.7685 | 0.0576 | -6.5237  | <0.0001 |
| region Syddanmark             | 0.5597    | 0.5044 | 0.6210 | 0.0530 | -10.9338 | <0.0001 |
| region Midtjylland            | 0.5139    | 0.4622 | 0.5714 | 0.0541 | -12.3020 | <0.0001 |
| region Nordjylland            | 0.4872    | 0.4214 | 0.5633 | 0.0739 | -9.7174  | <0.0001 |
| mother with disorder          | 2.5245    | 1.9578 | 3.2551 | 0.1296 | 7.1403   | <0.0001 |
| father with disorder          | 1.7947    | 1.2649 | 2.5463 | 0.1784 | 3.2768   | 0.0010  |

| 15. Respiratory - pneumonia   | exp(coef) | LCL    | UCL    | SE     | Z        | Pr(Z)   |
|-------------------------------|-----------|--------|--------|--------|----------|---------|
|                               | surgery   | 1.3240 | 1.1608 | 1.5101 | 0.0671   | 4.1832  |
| paternal age                  | 1.0006    | 0.9691 | 1.0331 | 0.0163 | 0.0393   | 0.9686  |
| maternal age                  | 0.9206    | 0.8871 | 0.9553 | 0.0188 | -4.3808  | <0.0001 |
| gestation length              | 0.9410    | 0.9168 | 0.9658 | 0.0132 | -4.5762  | <0.0001 |
| maternal bleeding             | 1.1810    | 1.0836 | 1.2872 | 0.0439 | 3.7884   | 0.0001  |
| fetal oxygen deprivation      | 0.7919    | 0.4253 | 1.4744 | 0.3171 | -0.7355  | 0.4619  |
| pregnancy oedema              | 1.1764    | 0.9672 | 1.4309 | 0.0998 | 1.6268   | 0.1037  |
| apgar5 score                  | 1.1410    | 1.0377 | 1.2546 | 0.0484 | 2.7253   | 0.0064  |
| birth weight                  | 0.9932    | 0.9691 | 1.0180 | 0.0125 | -0.5366  | 0.5914  |
| preexisting hypertension      | 1.3055    | 0.7566 | 2.2526 | 0.2783 | 0.9580   | 0.3380  |
| preexisting diabetes          | 1.3517    | 0.9472 | 1.9291 | 0.1814 | 1.6611   | 0.0966  |
| previous induced abortion     | 1.0011    | 0.9410 | 1.0650 | 0.0315 | 0.0359   | 0.9713  |
| previous spontaneous abortion | 1.1282    | 1.0571 | 1.2041 | 0.0332 | 3.6339   | 0.0002  |
| education level               | 0.9571    | 0.9305 | 0.9846 | 0.0144 | -3.0354  | 0.0024  |
| parental income               | 0.9415    | 0.9135 | 0.9703 | 0.0153 | -3.9167  | <0.0001 |
| country                       | 1.0843    | 0.9713 | 1.2104 | 0.0561 | 1.4422   | 0.1492  |
| region Sjælland               | 0.7564    | 0.7015 | 0.8156 | 0.0384 | -7.2614  | <0.0001 |
| region Syddanmark             | 0.7169    | 0.6709 | 0.7661 | 0.0338 | -9.8329  | <0.0001 |
| region Midtjylland            | 0.6266    | 0.5853 | 0.6709 | 0.0348 | -13.4182 | <0.0001 |
| region Nordjylland            | 0.6103    | 0.5579 | 0.6675 | 0.0457 | -10.7932 | <0.0001 |
| mother with disorder          | 1.6197    | 1.4629 | 1.7933 | 0.0519 | 9.2838   | <0.0001 |
| father with disorder          | 1.3583    | 1.2287 | 1.5017 | 0.0511 | 5.9842   | <0.0001 |

| 16. Respiratory - COPD        | exp(coef) | LCL    | UCL    | SE       | Z       | Pr(Z)   |
|-------------------------------|-----------|--------|--------|----------|---------|---------|
|                               | surgery   | 0.8602 | 0.5235 | 1.4136   | 0.2534  | -0.5940 |
| paternal age                  | 0.9531    | 0.8638 | 1.0517 | 0.0502   | -0.9549 | 0.3396  |
| maternal age                  | 0.9586    | 0.8563 | 1.0731 | 0.0575   | -0.7335 | 0.4632  |
| gestation length              | 1.0362    | 0.9553 | 1.1240 | 0.0415   | 0.8584  | 0.3906  |
| maternal bleeding             | 1.2130    | 0.9290 | 1.5839 | 0.1360   | 1.4194  | 0.1557  |
| fetal oxygen deprivation      | 0.6738    | 0.0944 | 4.8088 | 1.0026   | -0.3937 | 0.6937  |
| pregnancy oedema              | 1.6544    | 1.0316 | 2.6531 | 0.2409   | 2.0893  | 0.0366  |
| apgar5 score                  | 1.3064    | 0.9802 | 1.7412 | 0.1465   | 1.8236  | 0.0682  |
| birth weight                  | 0.8751    | 0.8105 | 0.9447 | 0.0390   | -3.4140 | 0.0006  |
| preexisting hypertension      | 0.0000    | 0.0000 | Inf    | 708.9937 | -0.0183 | 0.9853  |
| preexisting diabetes          | 1.1172    | 0.2772 | 4.5027 | 0.7111   | 0.1559  | 0.8760  |
| previous induced abortion     | 1.1376    | 0.9438 | 1.3713 | 0.0952   | 1.3536  | 0.1758  |
| previous spontaneous abortion | 1.0150    | 0.8227 | 1.2522 | 0.1071   | 0.1394  | 0.8890  |
| education level               | 0.9960    | 0.9125 | 1.0870 | 0.0446   | -0.0892 | 0.9288  |
| parental income               | 0.8047    | 0.7336 | 0.8826 | 0.0471   | -4.6047 | <0.0001 |
| country                       | 1.1794    | 0.8448 | 1.6463 | 0.1701   | 0.9696  | 0.3322  |
| region Sjælland               | 0.8507    | 0.6770 | 1.0691 | 0.1165   | -1.3863 | 0.1656  |
| region Syddanmark             | 0.7234    | 0.5873 | 0.8910 | 0.1063   | -3.0445 | 0.0023  |
| region Midtjylland            | 0.5806    | 0.4647 | 0.7254 | 0.1136   | -4.7842 | <0.0001 |
| region Nordjylland            | 0.7352    | 0.5635 | 0.9593 | 0.1357   | -2.2654 | 0.0234  |
| mother with disorder          | 1.9447    | 1.3673 | 2.7659 | 0.1797   | 3.7008  | 0.0002  |
| father with disorder          | 1.8048    | 1.2858 | 2.5331 | 0.1729   | 3.4137  | 0.0006  |

| 17. Digestive - all           | exp(coef) | LCL    | UCL    | SE     | Z        | Pr(Z)   |
|-------------------------------|-----------|--------|--------|--------|----------|---------|
|                               | surgery   | 1.1473 | 1.0954 | 1.2016 | 0.0236   | 5.8203  |
| paternal age                  | 0.9842    | 0.9736 | 0.9949 | 0.0055 | -2.8773  | 0.0040  |
| maternal age                  | 0.9152    | 0.9039 | 0.9267 | 0.0063 | -13.9125 | <0.0001 |
| gestation length              | 0.9817    | 0.9733 | 0.9903 | 0.0044 | -4.1507  | <0.0001 |
| maternal bleeding             | 1.0632    | 1.0316 | 1.0958 | 0.0153 | 3.9837   | <0.0001 |
| fetal oxygen deprivation      | 1.0666    | 0.9005 | 1.2635 | 0.0864 | 0.7471   | 0.4549  |
| pregnancy oedema              | 1.1464    | 1.0762 | 1.2212 | 0.0322 | 4.2373   | <0.0001 |
| apgar5 score                  | 1.0548    | 1.0205 | 1.0902 | 0.0168 | 3.1642   | 0.0015  |
| birth weight                  | 0.9811    | 0.9732 | 0.9891 | 0.0041 | -4.5845  | <0.0001 |
| preexisting hypertension      | 1.0167    | 0.8247 | 1.2535 | 0.1068 | 0.1557   | 0.8761  |
| preexisting diabetes          | 1.1361    | 0.9917 | 1.3014 | 0.0693 | 1.8407   | 0.0656  |
| previous induced abortion     | 1.0330    | 1.0120 | 1.0544 | 0.0104 | 3.1031   | 0.0019  |
| previous spontaneous abortion | 1.0464    | 1.0236 | 1.0697 | 0.0112 | 4.0339   | <0.0001 |
| education level               | 0.9596    | 0.9506 | 0.9687 | 0.0048 | -8.5606  | <0.0001 |
| parental income               | 0.9845    | 0.9746 | 0.9944 | 0.0051 | -3.0356  | 0.0024  |
| country                       | 0.8444    | 0.8089 | 0.8814 | 0.0218 | -7.7226  | <0.0001 |
| region Sjælland               | 0.9640    | 0.9395 | 0.9891 | 0.0131 | -2.7911  | 0.0052  |
| region Syddanmark             | 1.0301    | 1.0074 | 1.0533 | 0.0113 | 2.6106   | 0.0090  |
| region Midtjylland            | 0.8758    | 0.8559 | 0.8961 | 0.0117 | -11.3160 | <0.0001 |
| region Nordjylland            | 0.9154    | 0.8896 | 0.9420 | 0.0145 | -6.0592  | <0.0001 |
| mother with disorder          | 1.2999    | 1.2773 | 1.3229 | 0.0089 | 29.3263  | <0.0001 |
| father with disorder          | 1.1919    | 1.1713 | 1.2130 | 0.0089 | 19.6794  | <0.0001 |

| 18. Endocrine - all           | exp(coef) | LCL    | UCL    | SE     | Z        | Pr(Z)   |
|-------------------------------|-----------|--------|--------|--------|----------|---------|
|                               | surgery   | 1.4219 | 1.3340 | 1.5156 | 0.0325   | 10.8107 |
| paternal age                  | 0.9523    | 0.9373 | 0.9676 | 0.0081 | -6.0194  | <0.0001 |
| maternal age                  | 0.8700    | 0.8541 | 0.8862 | 0.0094 | -14.7928 | <0.0001 |
| gestation length              | 0.9850    | 0.9721 | 0.9980 | 0.0067 | -2.2535  | 0.0242  |
| maternal bleeding             | 1.0539    | 1.0065 | 1.1035 | 0.0234 | 2.2385   | 0.0251  |
| fetal oxygen deprivation      | 1.1634    | 0.9113 | 1.4852 | 0.1245 | 1.2150   | 0.2243  |
| pregnancy oedema              | 1.2464    | 1.1468 | 1.3547 | 0.0424 | 5.1848   | <0.0001 |
| apgar5 score                  | 1.1561    | 1.1010 | 1.2140 | 0.0249 | 5.8204   | <0.0001 |
| birth weight                  | 1.0364    | 1.0238 | 1.0492 | 0.0062 | 5.7184   | <0.0001 |
| preexisting hypertension      | 1.0717    | 0.7967 | 1.4415 | 0.1512 | 0.4579   | 0.6469  |
| preexisting diabetes          | 1.5356    | 1.3089 | 1.8015 | 0.0814 | 5.2640   | <0.0001 |
| previous induced abortion     | 1.0237    | 0.9921 | 1.0563 | 0.0159 | 1.4695   | 0.1416  |
| previous spontaneous abortion | 1.0572    | 1.0224 | 1.0932 | 0.0170 | 3.2597   | 0.0011  |
| education level               | 0.8435    | 0.8317 | 0.8555 | 0.0071 | -23.6601 | <0.0001 |
| parental income               | 0.8854    | 0.8720 | 0.8989 | 0.0077 | -15.7053 | <0.0001 |
| country                       | 0.8546    | 0.8060 | 0.9062 | 0.0298 | -5.2544  | <0.0001 |
| region Sjælland               | 1.2495    | 1.2038 | 1.2968 | 0.0189 | 11.7352  | <0.0001 |
| region Syddanmark             | 1.1639    | 1.1254 | 1.2038 | 0.0171 | 8.8387   | <0.0001 |
| region Midtjylland            | 0.8184    | 0.7890 | 0.8488 | 0.0186 | -10.7530 | <0.0001 |
| region Nordjylland            | 0.8643    | 0.8260 | 0.9043 | 0.0231 | -6.3058  | <0.0001 |
| mother with disorder          | 1.6494    | 1.6028 | 1.6975 | 0.0146 | 34.1846  | <0.0001 |
| father with disorder          | 1.5019    | 1.4520 | 1.5535 | 0.0172 | 23.6047  | <0.0001 |

| 19. Endocrine - obesity       | exp(coef) | LCL    | UCL    | SE     | Z        | Pr(Z)   |
|-------------------------------|-----------|--------|--------|--------|----------|---------|
|                               | surgery   | 1.4791 | 1.3682 | 1.5989 | 0.0397   | 9.8496  |
| paternal age                  | 0.9309    | 0.9127 | 0.9495 | 0.0100 | -7.1037  | <0.0001 |
| maternal age                  | 0.8191    | 0.8003 | 0.8383 | 0.0118 | -16.8246 | <0.0001 |
| gestation length              | 1.0006    | 0.9842 | 1.0172 | 0.0084 | 0.0716   | 0.9428  |
| maternal bleeding             | 1.0597    | 1.0001 | 1.1229 | 0.0295 | 1.9663   | 0.0492  |
| fetal oxygen deprivation      | 1.1808    | 0.8714 | 1.6001 | 0.1550 | 1.0724   | 0.2834  |
| pregnancy oedema              | 1.2806    | 1.1614 | 1.4121 | 0.0498 | 4.9627   | <0.0001 |
| apgar5 score                  | 1.1922    | 1.1222 | 1.2666 | 0.0308 | 5.6922   | <0.0001 |
| birth weight                  | 1.0761    | 1.0596 | 1.0928 | 0.0078 | 9.3232   | <0.0001 |
| preexisting hypertension      | 1.1605    | 0.8149 | 1.6527 | 0.1803 | 0.8254   | 0.4091  |
| preexisting diabetes          | 1.6440    | 1.3460 | 2.0080 | 0.1020 | 4.8717   | <0.0001 |
| previous induced abortion     | 1.0239    | 0.9843 | 1.0652 | 0.0201 | 1.1774   | 0.2390  |
| previous spontaneous abortion | 1.0744    | 1.0298 | 1.1210 | 0.0216 | 3.3165   | 0.0009  |
| education level               | 0.7633    | 0.7497 | 0.7771 | 0.0091 | -29.4817 | <0.0001 |
| parental income               | 0.8559    | 0.8397 | 0.8725 | 0.0097 | -15.8830 | <0.0001 |
| country                       | 0.6170    | 0.5696 | 0.6684 | 0.0407 | -11.8338 | <0.0001 |
| region Sjælland               | 1.4695    | 1.4031 | 1.5391 | 0.0235 | 16.3228  | <0.0001 |
| region Syddanmark             | 1.2905    | 1.2364 | 1.3470 | 0.0218 | 11.6744  | <0.0001 |
| region Midtjylland            | 0.7888    | 0.7517 | 0.8277 | 0.0245 | -9.6629  | <0.0001 |
| region Nordjylland            | 0.8477    | 0.7992 | 0.8991 | 0.0300 | -5.4979  | <0.0001 |
| mother with disorder          | 2.3217    | 2.2148 | 2.4338 | 0.0240 | 35.0183  | <0.0001 |
| father with disorder          | 1.9865    | 1.8466 | 2.1370 | 0.0372 | 18.4222  | <0.0001 |

| 20. Genitourinary - all       | exp(coef) | LCL    | UCL    | SE     | Z        | Pr(Z)   |
|-------------------------------|-----------|--------|--------|--------|----------|---------|
|                               | surgery   | 1.2301 | 1.1444 | 1.3223 | 0.0368   | 5.6202  |
| paternal age                  | 0.9673    | 0.9512 | 0.9837 | 0.0085 | -3.8680  | 0.0001  |
| maternal age                  | 0.8871    | 0.8699 | 0.9047 | 0.0100 | -11.9583 | <0.0001 |
| gestation length              | 0.9828    | 0.9693 | 0.9965 | 0.0070 | -2.4554  | 0.0140  |
| maternal bleeding             | 1.1235    | 1.0723 | 1.1770 | 0.0237 | 4.9003   | <0.0001 |
| fetal oxygen deprivation      | 0.8370    | 0.6085 | 1.1514 | 0.1626 | -1.0930  | 0.2743  |
| pregnancy oedema              | 1.1196    | 1.0103 | 1.2407 | 0.0524 | 2.1562   | 0.0310  |
| apgar5 score                  | 1.0349    | 0.9809 | 1.0919 | 0.0273 | 1.2571   | 0.2087  |
| birth weight                  | 0.9589    | 0.9465 | 0.9714 | 0.0066 | -6.3134  | <0.0001 |
| preexisting hypertension      | 1.1440    | 0.8416 | 1.5549 | 0.1565 | 0.8592   | 0.3902  |
| preexisting diabetes          | 1.1792    | 0.9542 | 1.4573 | 0.1080 | 1.5260   | 0.1270  |
| previous induced abortion     | 1.1282    | 1.0932 | 1.1642 | 0.0160 | 7.5174   | <0.0001 |
| previous spontaneous abortion | 1.0498    | 1.0135 | 1.0873 | 0.0179 | 2.7116   | 0.0066  |
| education level               | 0.9235    | 0.9099 | 0.9374 | 0.0075 | -10.4747 | <0.0001 |
| parental income               | 0.9292    | 0.9146 | 0.9439 | 0.0080 | -9.1300  | <0.0001 |
| country                       | 0.8827    | 0.8307 | 0.9380 | 0.0309 | -4.0235  | <0.0001 |
| region Sjælland               | 0.7110    | 0.6832 | 0.7400 | 0.0203 | -16.7614 | <0.0001 |
| region Syddanmark             | 0.6689    | 0.6458 | 0.6928 | 0.0179 | -22.4353 | <0.0001 |
| region Midtjylland            | 0.6183    | 0.5966 | 0.6408 | 0.0182 | -26.3803 | <0.0001 |
| region Nordjylland            | 0.6184    | 0.5904 | 0.6476 | 0.0235 | -20.3667 | <0.0001 |
| mother with disorder          | 1.3248    | 1.2829 | 1.3680 | 0.0163 | 17.1603  | <0.0001 |
| father with disorder          | 1.2897    | 1.2329 | 1.3492 | 0.0229 | 11.0648  | <0.0001 |

| <b>21. Genitourinary - kidney infection</b> | <b>exp(coef)</b> | <b>LCL</b> | <b>UCL</b> | <b>SE</b> | <b>Z</b> | <b>Pr(Z)</b> |
|---------------------------------------------|------------------|------------|------------|-----------|----------|--------------|
| surgery                                     | 1.2517           | 1.0408     | 1.5053     | 0.0941    | 2.3857   | 0.0170       |
| paternal age                                | 0.9927           | 0.9511     | 1.0361     | 0.0218    | -0.3329  | 0.7391       |
| maternal age                                | 0.8495           | 0.8078     | 0.8932     | 0.0256    | -6.3609  | <0.0001      |
| gestation length                            | 1.0194           | 0.9844     | 1.0556     | 0.0178    | 1.0801   | 0.2800       |
| maternal bleeding                           | 1.1398           | 1.0127     | 1.2828     | 0.0603    | 2.1708   | 0.0299       |
| fetal oxygen deprivation                    | 0.7703           | 0.3199     | 1.8550     | 0.4483    | -0.5817  | 0.5607       |
| pregnancy oedema                            | 0.8616           | 0.6325     | 1.1736     | 0.1577    | -0.9445  | 0.3448       |
| apgar5 score                                | 1.1320           | 0.9920     | 1.2918     | 0.0673    | 1.8413   | 0.0655       |
| birth weight                                | 0.9890           | 0.9569     | 1.0221     | 0.0168    | -0.6558  | 0.5119       |
| preexisting hypertension                    | 0.5109           | 0.1645     | 1.5865     | 0.5781    | -1.1615  | 0.2454       |
| preexisting diabetes                        | 1.4170           | 0.8768     | 2.2900     | 0.2449    | 1.4232   | 0.1546       |
| previous induced abortion                   | 1.1697           | 1.0813     | 1.2652     | 0.0400    | 3.9136   | <0.0001      |
| previous spontaneous abortion               | 1.1309           | 1.0370     | 1.2332     | 0.0441    | 2.7842   | 0.0053       |
| education level                             | 0.9301           | 0.8953     | 0.9662     | 0.0194    | -3.7233  | 0.0001       |
| parental income                             | 0.9641           | 0.9260     | 1.0037     | 0.0205    | -1.7768  | 0.0756       |
| country                                     | 0.6556           | 0.5516     | 0.7791     | 0.0880    | -4.7930  | <0.0001      |
| region Sjælland                             | 0.6920           | 0.6252     | 0.7658     | 0.0517    | -7.1162  | <0.0001      |
| region Syddanmark                           | 0.6402           | 0.5852     | 0.7005     | 0.0458    | -9.7202  | <0.0001      |
| region Midtjylland                          | 0.6340           | 0.5798     | 0.6933     | 0.0456    | -9.9903  | <0.0001      |
| region Nordjylland                          | 0.6342           | 0.5651     | 0.7117     | 0.0588    | -7.7415  | <0.0001      |
| mother with disorder                        | 1.5184           | 1.2248     | 1.8824     | 0.1096    | 3.8105   | 0.0001       |
| father with disorder                        | 1.6859           | 1.1081     | 2.5650     | 0.2141    | 2.4395   | 0.0147       |

| <b>22. Musculoskeletal - all</b> | <b>exp(coef)</b> | <b>LCL</b> | <b>UCL</b> | <b>SE</b> | <b>Z</b> | <b>Pr(Z)</b> |
|----------------------------------|------------------|------------|------------|-----------|----------|--------------|
| surgery                          | 1.1867           | 1.1471     | 1.2276     | 0.0173    | 9.8858   | <0.0001      |
| paternal age                     | 0.9732           | 0.9653     | 0.9811     | 0.0041    | -6.5519  | <0.0001      |
| maternal age                     | 0.9367           | 0.9280     | 0.9455     | 0.0047    | -13.6810 | <0.0001      |
| gestation length                 | 1.0003           | 0.9939     | 1.0068     | 0.0032    | 0.1048   | 0.9165       |
| maternal bleeding                | 1.0873           | 1.0633     | 1.1119     | 0.0113    | 7.3536   | <0.0001      |
| fetal oxygen deprivation         | 1.1636           | 1.0340     | 1.3094     | 0.0602    | 2.5153   | 0.0118       |
| pregnancy oedema                 | 1.0897           | 1.0357     | 1.1465     | 0.0259    | 3.3127   | 0.0009       |
| apgar5 score                     | 1.0198           | 0.9945     | 1.0456     | 0.0127    | 1.5350   | 0.1247       |
| birth weight                     | 0.9899           | 0.9839     | 0.9960     | 0.0031    | -3.2379  | 0.0012       |
| preexisting hypertension         | 1.0509           | 0.9043     | 1.2212     | 0.0766    | 0.6481   | 0.5169       |
| preexisting diabetes             | 1.0042           | 0.9042     | 1.1153     | 0.0535    | 0.0796   | 0.9365       |
| previous induced abortion        | 1.0476           | 1.0318     | 1.0637     | 0.0077    | 5.9926   | <0.0001      |
| previous spontaneous abortion    | 1.0306           | 1.0137     | 1.0478     | 0.0084    | 3.5788   | 0.0003       |
| education level                  | 0.9542           | 0.9474     | 0.9610     | 0.0036    | -12.9474 | <0.0001      |
| parental income                  | 0.9930           | 0.9855     | 1.0006     | 0.0038    | -1.7933  | 0.0729       |
| country                          | 0.8545           | 0.8281     | 0.8818     | 0.0160    | -9.8085  | <0.0001      |
| region Sjælland                  | 0.8453           | 0.8286     | 0.8623     | 0.0101    | -16.5041 | <0.0001      |
| region Syddanmark                | 0.8856           | 0.8706     | 0.9009     | 0.0087    | -13.9288 | <0.0001      |
| region Midtjylland               | 1.0379           | 1.0211     | 1.0550     | 0.0083    | 4.4759   | <0.0001      |
| region Nordjylland               | 0.8323           | 0.8141     | 0.8508     | 0.0112    | -16.3189 | <0.0001      |
| mother with disorder             | 1.3418           | 1.3256     | 1.3581     | 0.0061    | 47.6482  | <0.0001      |
| father with disorder             | 1.2296           | 1.2147     | 1.2447     | 0.0062    | 33.1873  | <0.0001      |

| 23. Neoplasms - all           | exp(coef) | LCL    | UCL    | SE     | Z       | Pr(Z)   |
|-------------------------------|-----------|--------|--------|--------|---------|---------|
|                               | surgery   | 1.1818 | 1.1042 | 1.2648 | 0.0346  | 4.8240  |
| paternal age                  | 0.9866    | 0.9709 | 1.0026 | 0.0081 | -1.6423 | 0.1005  |
| maternal age                  | 0.9691    | 0.9516 | 0.9870 | 0.0093 | -3.3521 | 0.0008  |
| gestation length              | 1.0002    | 0.9876 | 1.0129 | 0.0064 | 0.0365  | 0.9708  |
| maternal bleeding             | 1.0718    | 1.0256 | 1.1202 | 0.0224 | 3.0862  | 0.0020  |
| fetal oxygen deprivation      | 1.1266    | 0.8933 | 1.4207 | 0.1183 | 1.0071  | 0.3138  |
| pregnancy oedema              | 1.0020    | 0.9080 | 1.1057 | 0.0502 | 0.0413  | 0.9669  |
| apgar5 score                  | 0.9880    | 0.9400 | 1.0385 | 0.0254 | -0.4717 | 0.6370  |
| birth weight                  | 1.0187    | 1.0067 | 1.0309 | 0.0060 | 3.0684  | 0.0021  |
| preexisting hypertension      | 0.9176    | 0.6673 | 1.2618 | 0.1624 | -0.5287 | 0.5969  |
| preexisting diabetes          | 0.9963    | 0.8065 | 1.2309 | 0.1078 | -0.0337 | 0.9730  |
| previous induced abortion     | 0.9947    | 0.9650 | 1.0254 | 0.0154 | -0.3395 | 0.7341  |
| previous spontaneous abortion | 1.0285    | 0.9959 | 1.0621 | 0.0164 | 1.7130  | 0.0867  |
| education level               | 1.0055    | 0.9918 | 1.0195 | 0.0070 | 0.7907  | 0.4290  |
| parental income               | 1.0278    | 1.0129 | 1.0430 | 0.0074 | 3.6747  | 0.0002  |
| country                       | 0.9095    | 0.8506 | 0.9724 | 0.0341 | -2.7797 | 0.0054  |
| region Sjælland               | 1.1015    | 1.0605 | 1.1441 | 0.0193 | 5.0010  | <0.0001 |
| region Syddanmark             | 1.1813    | 1.1429 | 1.2209 | 0.0168 | 9.8893  | <0.0001 |
| region Midtjylland            | 1.1349    | 1.0980 | 1.1729 | 0.0168 | 7.5155  | <0.0001 |
| region Nordjylland            | 0.9290    | 0.8892 | 0.9707 | 0.0223 | -3.2886 | 0.0010  |
| mother with disorder          | 1.1866    | 1.1578 | 1.2160 | 0.0125 | 13.6780 | <0.0001 |
| father with disorder          | 1.1509    | 1.1137 | 1.1894 | 0.0167 | 8.3812  | <0.0001 |

| 24. Neoplasms - benign        | exp(coef) | LCL    | UCL    | SE     | Z       | Pr(Z)   |
|-------------------------------|-----------|--------|--------|--------|---------|---------|
|                               | surgery   | 1.1734 | 1.0906 | 1.2625 | 0.0373  | 4.2819  |
| paternal age                  | 0.9808    | 0.9640 | 0.9979 | 0.0088 | -2.1957 | 0.0281  |
| maternal age                  | 0.9758    | 0.9568 | 0.9952 | 0.0100 | -2.4287 | 0.0151  |
| gestation length              | 0.9985    | 0.9850 | 1.0121 | 0.0069 | -0.2138 | 0.8306  |
| maternal bleeding             | 1.0624    | 1.0131 | 1.1142 | 0.0242 | 2.4983  | 0.0124  |
| fetal oxygen deprivation      | 1.1722    | 0.9147 | 1.5021 | 0.1265 | 1.2557  | 0.2092  |
| pregnancy oedema              | 1.0070    | 0.9046 | 1.1211 | 0.0547 | 0.1290  | 0.8973  |
| apgar5 score                  | 0.9802    | 0.9290 | 1.0344 | 0.0274 | -0.7258 | 0.4679  |
| birth weight                  | 1.0169    | 1.0040 | 1.0300 | 0.0065 | 2.5787  | 0.0099  |
| preexisting hypertension      | 0.8518    | 0.5986 | 1.2119 | 0.1799 | -0.8915 | 0.3726  |
| preexisting diabetes          | 1.0204    | 0.8161 | 1.2757 | 0.1139 | 0.1773  | 0.8592  |
| previous induced abortion     | 1.0020    | 0.9700 | 1.0351 | 0.0165 | 0.1249  | 0.9005  |
| previous spontaneous abortion | 1.0476    | 1.0122 | 1.0842 | 0.0175 | 2.6509  | 0.0080  |
| education level               | 1.0106    | 0.9957 | 1.0257 | 0.0075 | 1.4002  | 0.1614  |
| parental income               | 1.0247    | 1.0086 | 1.0411 | 0.0080 | 3.0291  | 0.0024  |
| country                       | 0.9149    | 0.8521 | 0.9823 | 0.0362 | -2.4504 | 0.0142  |
| region Sjælland               | 1.0861    | 1.0425 | 1.1315 | 0.0208 | 3.9553  | <0.0001 |
| region Syddanmark             | 1.1912    | 1.1497 | 1.2342 | 0.0180 | 9.6718  | <0.0001 |
| region Midtjylland            | 1.1392    | 1.0995 | 1.1803 | 0.0180 | 7.2084  | <0.0001 |
| region Nordjylland            | 0.8886    | 0.8471 | 0.9322 | 0.0244 | -4.8336 | <0.0001 |
| mother with disorder          | 1.2197    | 1.1850 | 1.2554 | 0.0147 | 13.5030 | <0.0001 |
| father with disorder          | 1.1915    | 1.1412 | 1.2441 | 0.0220 | 7.9609  | <0.0001 |

| 25. Circulatory - all         | exp(coef) | LCL    | UCL    | SE     | Z       | Pr(Z)   |
|-------------------------------|-----------|--------|--------|--------|---------|---------|
|                               | surgery   | 1.2572 | 1.1423 | 1.3836 | 0.0488  | 4.6819  |
| paternal age                  | 0.9735    | 0.9508 | 0.9967 | 0.0120 | -2.2269 | 0.0259  |
| maternal age                  | 0.9472    | 0.9221 | 0.9730 | 0.0137 | -3.9523 | <0.0001 |
| gestation length              | 0.9678    | 0.9499 | 0.9862 | 0.0095 | -3.4116 | 0.0006  |
| maternal bleeding             | 1.1376    | 1.0682 | 1.2115 | 0.0321 | 4.0168  | <0.0001 |
| fetal oxygen deprivation      | 0.8318    | 0.5656 | 1.2233 | 0.1968 | -0.9356 | 0.3494  |
| pregnancy oedema              | 1.0047    | 0.8718 | 1.1578 | 0.0723 | 0.0652  | 0.9479  |
| apgar5 score                  | 1.2107    | 1.1315 | 1.2955 | 0.0345 | 5.5366  | <0.0001 |
| birth weight                  | 0.9762    | 0.9592 | 0.9935 | 0.0089 | -2.6791 | 0.0073  |
| preexisting hypertension      | 1.1746    | 0.8191 | 1.6845 | 0.1839 | 0.8753  | 0.3813  |
| preexisting diabetes          | 0.8929    | 0.6535 | 1.2200 | 0.1592 | -0.7109 | 0.4771  |
| previous induced abortion     | 0.9872    | 0.9437 | 1.0327 | 0.0230 | -0.5581 | 0.5767  |
| previous spontaneous abortion | 1.0385    | 0.9900 | 1.0894 | 0.0244 | 1.5498  | 0.1211  |
| education level               | 0.9725    | 0.9528 | 0.9925 | 0.0104 | -2.6777 | 0.0074  |
| parental income               | 0.9822    | 0.9612 | 1.0038 | 0.0110 | -1.6158 | 0.1061  |
| country                       | 0.8739    | 0.7953 | 0.9603 | 0.0480 | -2.8020 | 0.0050  |
| region Sjælland               | 1.0000    | 0.9468 | 1.0561 | 0.0278 | 0.0005  | 0.9995  |
| region Syddanmark             | 0.9184    | 0.8744 | 0.9647 | 0.0250 | -3.3894 | 0.0007  |
| region Midtjylland            | 0.9612    | 0.9159 | 1.0087 | 0.0246 | -1.6048 | 0.1085  |
| region Nordjylland            | 0.7713    | 0.7224 | 0.8235 | 0.0334 | -7.7712 | <0.0001 |
| mother with disorder          | 1.5048    | 1.4406 | 1.5718 | 0.0222 | 18.3929 | <0.0001 |
| father with disorder          | 1.3268    | 1.2735 | 1.3823 | 0.0209 | 13.5241 | <0.0001 |

| 26. Nervous System - all      | exp(coef) | LCL    | UCL    | SE     | Z       | Pr(Z)   |
|-------------------------------|-----------|--------|--------|--------|---------|---------|
|                               | surgery   | 1.2465 | 1.1038 | 1.4077 | 0.0620  | 3.5523  |
| paternal age                  | 0.9775    | 0.9492 | 1.0067 | 0.0149 | -1.5108 | 0.1308  |
| maternal age                  | 0.8869    | 0.8572 | 0.9177 | 0.0173 | -6.8959 | <0.0001 |
| gestation length              | 0.9914    | 0.9681 | 1.0154 | 0.0121 | -0.7013 | 0.4830  |
| maternal bleeding             | 1.1226    | 1.0355 | 1.2169 | 0.0411 | 2.8090  | 0.0049  |
| fetal oxygen deprivation      | 1.5720    | 1.0966 | 2.2535 | 0.1837 | 2.4620  | 0.0138  |
| pregnancy oedema              | 1.2383    | 1.0597 | 1.4469 | 0.0794 | 2.6910  | 0.0071  |
| apgar5 score                  | 1.0651    | 0.9719 | 1.1673 | 0.0467 | 1.3514  | 0.1765  |
| birth weight                  | 0.9760    | 0.9545 | 0.9979 | 0.0113 | -2.1384 | 0.0324  |
| preexisting hypertension      | 1.0660    | 0.6046 | 1.8796 | 0.2893 | 0.2211  | 0.8249  |
| preexisting diabetes          | 1.4444    | 1.0338 | 2.0180 | 0.1706 | 2.1548  | 0.0311  |
| previous induced abortion     | 1.0577    | 0.9999 | 1.1189 | 0.0286 | 1.9576  | 0.0502  |
| previous spontaneous abortion | 1.0778    | 1.0151 | 1.1445 | 0.0306 | 2.4496  | 0.0142  |
| education level               | 0.9068    | 0.8837 | 0.9304 | 0.0131 | -7.4494 | <0.0001 |
| parental income               | 0.9420    | 0.9164 | 0.9682 | 0.0140 | -4.2622 | <0.0001 |
| country                       | 0.7021    | 0.6177 | 0.7980 | 0.0653 | -5.4111 | <0.0001 |
| region Sjælland               | 1.4244    | 1.3326 | 1.5225 | 0.0339 | 10.4064 | <0.0001 |
| region Syddanmark             | 1.1577    | 1.0875 | 1.2325 | 0.0319 | 4.5873  | <0.0001 |
| region Midtjylland            | 0.9924    | 0.9303 | 1.0586 | 0.0329 | -0.2293 | 0.8186  |
| region Nordjylland            | 0.7426    | 0.6793 | 0.8118 | 0.0454 | -6.5443 | <0.0001 |
| mother with disorder          | 1.5513    | 1.4474 | 1.6626 | 0.0353 | 12.4189 | <0.0001 |
| father with disorder          | 1.4043    | 1.2898 | 1.5290 | 0.0433 | 7.8257  | <0.0001 |



| 27. Eye/adnexa - all          | exp(coef) | LCL    | UCL    | SE     | Z        | Pr(Z)   |
|-------------------------------|-----------|--------|--------|--------|----------|---------|
|                               | surgery   | 1.2321 | 1.1481 | 1.3224 | 0.0360   | 5.7893  |
| paternal age                  | 1.0041    | 0.9889 | 1.0196 | 0.0077 | 0.5377   | 0.5907  |
| maternal age                  | 0.9744    | 0.9575 | 0.9916 | 0.0089 | -2.9049  | 0.0036  |
| gestation length              | 0.9555    | 0.9438 | 0.9674 | 0.0062 | -7.2176  | <0.0001 |
| maternal bleeding             | 1.0886    | 1.0435 | 1.1357 | 0.0216 | 3.9319   | <0.0001 |
| fetal oxygen deprivation      | 1.1691    | 0.9159 | 1.4923 | 0.1245 | 1.2547   | 0.2095  |
| pregnancy oedema              | 1.0748    | 0.9753 | 1.1843 | 0.0495 | 1.4569   | 0.1451  |
| apgar5 score                  | 1.0598    | 1.0116 | 1.1104 | 0.0237 | 2.4470   | 0.0144  |
| birth weight                  | 0.9579    | 0.9469 | 0.9691 | 0.0059 | -7.2482  | <0.0001 |
| preexisting hypertension      | 0.9791    | 0.7281 | 1.3165 | 0.1510 | -0.1396  | 0.8889  |
| preexisting diabetes          | 1.0886    | 0.8970 | 1.3213 | 0.0988 | 0.8599   | 0.3898  |
| previous induced abortion     | 1.0299    | 1.0004 | 1.0602 | 0.0148 | 1.9901   | 0.0465  |
| previous spontaneous abortion | 1.0697    | 1.0370 | 1.1035 | 0.0158 | 4.2557   | <0.0001 |
| education level               | 0.9576    | 0.9449 | 0.9704 | 0.0067 | -6.3771  | <0.0001 |
| parental income               | 0.9588    | 0.9453 | 0.9726 | 0.0072 | -5.7941  | <0.0001 |
| country                       | 1.0282    | 0.9741 | 1.0852 | 0.0275 | 1.0099   | 0.3125  |
| region Sjælland               | 0.7668    | 0.7399 | 0.7948 | 0.0182 | -14.5350 | <0.0001 |
| region Syddanmark             | 0.7503    | 0.7273 | 0.7741 | 0.0159 | -18.0320 | <0.0001 |
| region Midtjylland            | 0.6379    | 0.6176 | 0.6589 | 0.0165 | -27.2123 | <0.0001 |
| region Nordjylland            | 0.6678    | 0.6406 | 0.6962 | 0.0212 | -19.0308 | <0.0001 |
| mother with disorder          | 1.3216    | 1.2740 | 1.3711 | 0.0187 | 14.8854  | <0.0001 |
| father with disorder          | 1.2350    | 1.1895 | 1.2823 | 0.0191 | 11.0076  | <0.0001 |

| 28. Mental - all              | exp(coef) | LCL    | UCL    | SE     | Z        | Pr(Z)   |
|-------------------------------|-----------|--------|--------|--------|----------|---------|
|                               | surgery   | 1.2207 | 1.1617 | 1.2827 | 0.0252   | 7.8881  |
| paternal age                  | 1.0128    | 1.0013 | 1.0245 | 0.0058 | 2.1899   | 0.0285  |
| maternal age                  | 0.9186    | 0.9063 | 0.9310 | 0.0068 | -12.3982 | <0.0001 |
| gestation length              | 0.9816    | 0.9722 | 0.9911 | 0.0049 | -3.7726  | 0.0001  |
| maternal bleeding             | 1.1343    | 1.0988 | 1.1711 | 0.0162 | 7.7552   | <0.0001 |
| fetal oxygen deprivation      | 1.1764    | 0.9759 | 1.4180 | 0.0953 | 1.7046   | 0.0882  |
| pregnancy oedema              | 1.0797    | 1.0019 | 1.1635 | 0.0381 | 2.0109   | 0.0443  |
| apgar5 score                  | 1.0604    | 1.0224 | 1.0998 | 0.0186 | 3.1532   | 0.0016  |
| birth weight                  | 0.9713    | 0.9625 | 0.9802 | 0.0046 | -6.2651  | <0.0001 |
| preexisting hypertension      | 1.1697    | 0.9451 | 1.4477 | 0.1087 | 1.4410   | 0.1495  |
| preexisting diabetes          | 1.0996    | 0.9505 | 1.2721 | 0.0743 | 1.2782   | 0.2011  |
| previous induced abortion     | 1.1278    | 1.1035 | 1.1525 | 0.0110 | 10.8546  | <0.0001 |
| previous spontaneous abortion | 1.0700    | 1.0443 | 1.0964 | 0.0124 | 5.4555   | <0.0001 |
| education level               | 0.9604    | 0.9502 | 0.9706 | 0.0054 | -7.4472  | <0.0001 |
| parental income               | 0.7861    | 0.7772 | 0.7951 | 0.0058 | -41.2779 | <0.0001 |
| country                       | 0.4837    | 0.4589 | 0.5098 | 0.0267 | -27.1019 | <0.0001 |
| region Sjælland               | 0.8449    | 0.8214 | 0.8691 | 0.0144 | -11.6955 | <0.0001 |
| region Syddanmark             | 0.9181    | 0.8963 | 0.9404 | 0.0122 | -6.9658  | <0.0001 |
| region Midtjylland            | 0.7672    | 0.7480 | 0.7869 | 0.0129 | -20.5154 | <0.0001 |
| region Nordjylland            | 0.5602    | 0.5402 | 0.5809 | 0.0185 | -31.2647 | <0.0001 |
| mother with disorder          | 2.0486    | 2.0005 | 2.0979 | 0.0121 | 59.1078  | <0.0001 |
| father with disorder          | 1.6284    | 1.5831 | 1.6749 | 0.0143 | 33.9213  | <0.0001 |

**Table S8. Relative risks (RR), absolute risk difference (ARD), number needed to treat (NNT(B/H) or benefit/harm) for conditions surgeries aim to treat**

| Conditions                 | adenoidectomy      |       |          |           | tonsillectomy      |        |          |          | adenotonsillectomy |        |          |          | CR    |
|----------------------------|--------------------|-------|----------|-----------|--------------------|--------|----------|----------|--------------------|--------|----------|----------|-------|
|                            | RR                 | ER    | ARD      | NNT(B/H)  | RR                 | ER     | ARD      | NNT(B/H) | RR                 | ER     | ARD      | NNT(B/H) |       |
| <b>Sleep disorders</b>     | 0.30(0.15-0.60)*   | 1.05  | -0.083 % | -1209 (B) | 0.24(0.07-0.75)    | -      | -        | -        | 0.46(0.28-0.77)    | -      | -        | -        | 0.119 |
| <b>Abnormal breathing</b>  | 1.04(0.61-1.78)    | -     | -        | -         | 0.70(0.26-1.89)    | -      | -        | -        | 0.59(0.30-1.14)    | -      | -        | -        | 0.045 |
| <b>Sinusitis</b>           | 1.54(1.14-2.08)    | -     | -        | -         | 1.03(0.63-1.69)    | -      | -        | -        | 1.68(1.32-2.14)*** | 0.479  | +0.116%  | 865 (H)  | 0.169 |
| <b>Chronic sinusitis</b>   | 2.25(1.69-3.00)*** | 1.47  | +0.11%   | 905 (H)   | 1.25(0.75-2.08)    | -      | -        | -        | 1.17(0.84-1.63)    | -      | -        | -        | 0.088 |
| <b>Otitis media</b>        | 4.84(4.48-5.23)*** | 57.75 | +19.495% | 5 (H)     | 2.22(1.94-2.54)*** | 10.263 | +6.217%  | 16 (H)   | 2.06(1.88-2.25)*** | 27.513 | +5.385%  | 19 (H)   | 5.073 |
| <b>Tonsillitis</b>         | 0.21(0.16-0.29)*** | 5.86  | -1.815 % | -55 (B)   | 0.09(0.05-0.17)*** | 16.487 | -2.102 % | -48 (B)  | 0.09(0.06-0.14)*** | 14.685 | -2.092 % | -48 (B)  | 2.321 |
| <b>Chronic tonsillitis</b> | 0.54(0.39-0.74)**  | 92.36 | -0.299 % | -334 (B)  | 0.20(0.11-0.38)*** | 80.486 | -0.52 %  | -192 (B) | 0.11(0.06-0.19)*** | 98.315 | -0.582 % | -172 (B) | 0.657 |

Footnotes:

- CR - Control Risk (i.e. event rate (%) in the control group)
- ER - Experimental Risk (i.e. event rate (%) in the case (surgery) group)
- ARD - Absolute Risk Difference (a.k.a. absolute risk reduction/increase) [ARD=100 X CR X (1-RR)]
- NNT(B/H) - Number Needed to Treat-Benefit or Harm [NNT=100/ARD]
- RR exclusion: Relative risks (RR) are presented only for analyses with sufficient power for hypothesis testing (see methods)
  - > i.e. there was insufficient power to test obstructive sleep apnea in any analysis (hence, there are no results here)
- ER, ARD and NNT exclusion: these values are presented only when Bonferroni corrected p-value (21 tests;  $\alpha=0.05/21=0.00238$ ) for relative risks (RR) were significant
  - > Bonferroni corrected p-values are given in RR column (\* $p<0.05$ , \*\* $p<0.01$ , \*\*\* $p<0.001$ )

## Supplementary Methods

**Study sample:** While we had access to health data on individuals older than 30 years, we focused on individuals born and living between 1979-2009 for two important reasons. Firstly, we needed to code whether surgery was performed for adenoidectomy, tonsillectomy or adenotonsillectomy between birth and nine years of age. For any individual born before 1979 (who had no record of these surgeries after 1979), we could not determine that. Secondly, for individuals born before 1979, we had no prior disease history or information on most of their covariates. Therefore, including those individuals would have introduced both bias in censoring in the Cox regression model between those born before or after 1979, as well as introducing large amounts of missing information for those born before 1979 (i.e. they would have had to be removed before analysis anyway). Electronic health data were not available before 1977-78 in Denmark, and data after 2009 were not available at the time of request permission to use the data.

**Propensity analysis considerations:** Utilizing Danish medical history data collected from birth, we matched the health of cases and controls prior to surgery (see ‘Study sample obtained from the Danish health registries’ in the main paper and ‘Testing for biases in early general health between cases and controls’ below). This approach is comparable (and perhaps more accurate) than propensity analysis for at least some purposes of our study as we discuss below.

Technically, the aim of propensity analysis is to reduce baseline differences between control and treatment individuals for their outcome variables (i.e. disease) that may have existed before the predictor variable (i.e. surgery) was measured. For example, under a normal scenario for observational studies, propensity analysis would utilize predictor variables measured at/before baseline that correlate with disease outcomes – these are used to provide a propensity score and/or match cases and controls to reduce this baseline variation, or in other words reduce disease covariation that existed for control and treatment individuals at baseline. This reduces potential disease confounding/correlation that existed before any main predictor variable was measured.

The reason for using the propensity approach is that in typical observational studies the entire disease life histories of individuals is rarely if ever available, so the ‘disease covariates’ that form the propensity score/matching variables serve as a proxy for pre-existing indicators of disease outcomes. In our study we had the complete disease histories (main disease, general health) of all individuals measured from birth. Thus, rather than having to use proxy ‘disease covariates’ to control for potential pre-existing disease indications/biases, we used actual indications of pre-existing disease measured from birth to match health of cases and controls prior to surgery. This should provide more accurate and direct controls for pre-existing disease confounding.

Obviously, our approach cannot be done for the majority of health studies because complete health records from birth are rarely available for the individuals who are chosen to enter those studies. This is one of the major advantages of working with the public health databases of Denmark and other Nordic countries.

On a technical note, propensity analysis would also limit the number of diseases we could investigate as the matching process typically involves selecting smaller sample sizes than we use in our study. As noted in our text on statistical power analyses, there were some diseases that only just passed (some did not) the power threshold even with the massive sample sizes we had access to. One of the aims of our study was to provide a survey of risks for a wide range of diseases, which was only possible with the large sample sizes we had. Propensity analysis would have greatly limited our ability to evaluate broad impacts. Also note that propensity analysis has received some criticisms because it can only account for observed (not hidden) covariation,<sup>1</sup> meaning biases may still be present after matching,<sup>2</sup> and some have argued it may increase bias in some instances.<sup>3</sup>

**Power analyses:** To reduce the possibility of encountering false negative results, we carried out power analyses with the powerSurvEpi package in R v 3.4.1, which checks whether sample sizes are large enough to test the null hypothesis of no association between predictor and subsequent disease. The powerSurvEpi algorithm calculates the minimum sample size needed to detect an effect of a given size with a given degree of confidence based on the risk ratio, which we derived from the actual relative risks for outcome diseases, the variance of the main covariate of interest (surgery), the proportion of subjects who were diagnosed with the disease, the postulated power, and the type I error rate. Most diseases within each surgery group met these thresholds. Of the 84 disease x surgery combinations examined (28 disease groups x 3 surgery groups = 84), six (~7%) did not and were excluded from the results reported. Power analyses performed for general health (see ‘Testing for biases in early general health before surgery’ in the main paper) utilized a conservative postulated ratio of  $\exp(0.05)$  or 1.05 given relative risks were not available for this general health category.

**Converting RR to AR and NNT:** To interpret risks based on their actual effect size in the population<sup>4</sup> and provide statistics that are more clinically useful,<sup>5</sup> we used risks derived from Cox regressions and prevalence of disease in control samples (control risk, CR) to estimate absolute risk difference (ARD, also known as absolute risk reduction or increase) and number needed to treat (NNT).  $ARD = 100 \times CR \times (1 - RR)$  and  $NNT = 100 / ARD$ . Conversion between RR and ARD is mainly modified by the control risk, i.e. if RR for a disease is large but its prevalence in the population is low, it will generally have a small ARD and thus low impact. Conversion between ARD and NNT implies they are inversely linked, i.e. if ARD is large, very few patients need to be treated to observe benefit or harm in one of them. If ARD is small, many patients need to be treated to observe benefit or harm in one of them. Positive and negative NNT values are used to indicate whether treatment results in harm (NNT-harm) or benefit (NNT-benefit) respectively, with numbers closer to zero indicating harm or benefit more often than larger values. For example, an NNT-benefit value of 5 suggests that treatment in 5 patients would need to be performed for one of them to benefit. An NNT-harm value of 100 suggests that treatment in 100 patients would need to be performed for one of them to experience an adverse effect.

**Testing for biases in early general health between cases and controls:** In order to test whether there were significant differences between (surgery) cases and controls regarding diseases diagnosed in the first 9 years of life, i.e. testing whether individuals who underwent surgery in the first 9 years of life represented a generally ‘more sickly’

sample of individuals that could bias estimation of incident disease risk beyond 9 years of age, we tested two null hypotheses. *Null hypothesis 1*: There is no difference between case and control age distributions for diseases diagnosed in the first 9 years of life. This sought to compare age at diagnosis distributions for any disease (potentially multiple diagnoses for each individual) to see whether individuals who underwent the three target surgeries also tended to have more disease diagnoses overall in the first 9 years of life. *Null hypothesis 2*: There is no difference in age at first disease diagnosed in the first 9 years of life between cases and controls. This sought to compare age at diagnosis distributions for the first disease diagnosed to see whether individuals who underwent the three target surgeries received their first disease diagnosis earlier in life within the first 9 years. General health: In order to test for differences in general health, we pooled ICD diagnoses that capture almost all of the main disease groups described by ICD10, i.e. the same broad set defined in Hollegaard et al. <sup>6</sup> These capture a much wider range of diseases and should be more representative of general health in a population.

*For null hypothesis 1*, we randomly sampled from the control individuals (those who did not undergo surgery during 1979-2009) the same number of individuals who had undergone each specific surgery. For example, there were 20,238 (out of 1,668,632) individuals who underwent adenoidectomy between birth and 9 years of age in our sample. We randomly sampled the same number (n=20,238) from the control sample (n=1,648,394 without surgery) and tested whether distributions for general health diseases diagnosed at any age within the first 9 years between surgery individuals and controls were significantly different with a Kolmogorov-Smirnov test. We repeated this 1000 times, each time randomly sampling 20,238 individuals (with replacement) from the control sample and comparing this to the surgery group's distribution for age at any general health disease diagnosis within the first 9 years. The permuted p value was based on the number of times (out of 1000) that the two distributions were the same. Permuted p was >0.05 in all cases supporting the null hypothesis of no difference between case and control age distributions for general health diseases diagnosed in the first 9 years of life. *For null hypothesis 2*, the same permutation procedure was carried out as for null hypothesis 1, except only the age at first diagnosis was considered. For all three surgery groups, permuted p was > 0.05, supporting the null hypothesis. These results show that general health in the first 9 years of life was not significantly different between the surgery groups versus control individuals. In other words, individuals who underwent these surgeries in the first 9 years of life were not sicker prior to surgery, compared to the general population.

**The Danish National Patient Registry (DNPR) <sup>7</sup> – comprehensive and accurate records of health and disease:** There are three key pieces of information that provide confidence that our target disease groups (to assess disease risk following surgery) and definition of general health above (to test for pre-existing differences in health between cases and controls) were comprehensive and accurate based on DNPR data:

- 1) The Danish health care system is free for all residents so there are no financial concerns about GP or hospital visits, meaning there is minimal bias in health care access based on socioeconomic differences.
- 2) Healthcare professionals are paid per diagnosis, so it is in their interest to rigorously document all patient diagnoses. Therefore patient medical history in the DNPR is extremely comprehensive.

- 3) The DNPR includes inpatient and outpatient admissions, primary and where relevant secondary diagnoses. For any inpatient or outpatient visit, further information is available including for example duration, date and location of visit and age of participant. This ensures that the medical history of patients is very complete, diagnoses can be tracked and validated, and disease co-morbidity can be accounted for.

## References

1. Garrido MM, Kelley AS, Paris J, et al. Methods for constructing and assessing propensity scores. *Health services research*. Oct2014;49(5):1701-1720.
2. Shadish WR, Cook TD, Campbell DT. *Experimental and quasi-experimental designs for generalized causal inference*. Boston: Houghton Mifflin;2001.
3. Pearl J. *Causality : models, reasoning, and inference*. 2nd ed. Cambridge ; New York: Cambridge University Press; 2009.
4. King NB, Harper S, Young ME. Use of relative and absolute effect measures in reporting health inequalities: structured review. *BMJ*. 2012;345:e5774.
5. Barratt A, Wyer PC, Hatala R, et al. Tips for learners of evidence-based medicine: 1. Relative risk reduction, absolute risk reduction and number needed to treat. *CMAJ*. Aug 17 2004;171(4):353-358.
6. Hollegaard B, Byars SG, Lykke J, Boomsma JJ. Parent-offspring conflict and the persistence of pregnancy-induced hypertension in modern humans. *PLoS One*. 2013;8(2):e56821.
7. Schmidt M, Schmidt SA, Sandegaard JL, Ehrenstein V, Pedersen L, Sorensen HT. The Danish National Patient Registry: a review of content, data quality, and research potential. *Clinical epidemiology*. 2015;7:449-490.

## Supplementary Results and Discussion

**Consistent impact of covariates on risk of many diseases:** Some covariates showed very consistent effects on risk for many diseases. Accounting for these effects is therefore likely to be important in any longitudinal population-based study examining these types of disease risks.

The most consistent effect in Fig. 2 in terms of disease relative risk magnitude (e.g. RR ranged from 1.10 to 3.71) and direction of effect (i.e. risk was increased for every disease) was whether either parent had previously been diagnosed within the same disease group (i.e. had received an ICD diagnosis code for the same disease). The largest relative risks were found for asthma (RR ranged from 2.05 to 2.19 across all analyses), allergies (RR ranged from 1.10 to 3.26), obesity (RR ranged from 1.97 to 2.34), and mental disorders (RR ranged from 1.60 to 2.04): a family history of these diseases greatly increased risk of these in their children. As would be expected for polygenic diseases, these effects were largely consistent regardless of whether that disease was diagnosed on the maternal or paternal side. The exceptions were urticaria/angioedema, influenza, and kidney infections, where risk was significantly increased only if the mother (and not father) had a history of these diseases.

Maternal age at birth of individuals in our sample was consistently significantly associated with decreased risk for 16 of the 28 disease groups in Fig. 2. This effect was largest in endocrine (RR 0.79 to 0.87 across all analyses), kidney (RR 0.84 to 0.89), and nervous system (RR 0.87 to 0.89) diseases. The exception was allergic rhinitis, where older mothers conferred increased risk (RR 1.05 to 1.07). Maternal bleeding during pregnancy had many widespread and consistent effects, with 16 out of 28 diseases examined showing significantly elevated risks if this complication occurred (RR 1.02 to 1.27).

Other covariates such as parental education, income and country of origin also showed many significant effects, but risk direction varied considerably depending on the disease considered. For example, mental disorders were less frequent in Danish nationals than in immigrants (RR 0.48 to 0.49), yet risk of influenza was much higher in Danes (RR 1.89 to 2.06). Higher parental education and income mostly decreased the risk of many diseases (RR 0.76 to 0.99), but increased the risk of a few, including some allergic diseases (RR 1.04-1.06). Both effects could result from differences in the microbiota children are exposed to. Many complex patterns highlighted regional differences in diseases. For example, obesity risk was higher in Sjælland (RR 1.46 to 1.48) and Syddanmark (RR 1.29 to 1.39) but lower in Midtjylland (RR 0.78 to 0.84) and Nordjylland (RR 0.84 to 0.92) relative to Hovedstaden.

**Other important and interesting associations of covariates with disease risk:** That risk for several diseases was sensitive to many covariates suggests that these diseases may have particularly complex causation. For example, risk of skin (group: all), digestive (group: all) endocrine (group: all, obesity) and mental diseases (group: all) were influenced by many (up to 15 out of 21) covariates. There were also very specific disease risk-covariate interactions. For example, the relative risk of influenza (RR 2.75 to 3.12) (but no other disease) was significantly and massively increased by maternal

hypertension prior to pregnancy; oedema during pregnancy greatly increased relative risk for urticaria/angiodema (RR 1.51 to 1.56); and diabetes prior to pregnancy greatly increased risk for all endocrine (RR 1.44 to 1.66) and autoimmune diseases (RR 1.47 to 1.55).

**Increased risk of otitis media associated with adenoidectomy:** Increased long-term risk of otitis media associated with adenoidectomy was unexpected and therefore deserves further consideration here. Here we 1) speculate over possible reasons why some conditions such as otitis media were increased after adenoidectomy given the lack of evidence in previous studies, 2) provide evidence that the assumed beneficial effects of these surgeries is not always supported, and 3) discuss a possible mechanistic link between adenoidectomy increasing subsequent otitis media.

*1) why is adenoidectomy associated with increased long-term otitis media risk?* Perhaps the simplest explanation is that no previous study has looked at long-term associations between these surgeries and the conditions they aim to treat. Studies commonly investigate short-term health impacts after these surgeries (i.e. typically within 1-3 years post-operation). No previous study has looked at the long-term risks of otitis media after adenoidectomy, so we have no comparison for our study. Perhaps disease risks associated with these surgeries only begin to become apparent longer-term? Of the few studies that have investigated longer-term health risks (i.e. >3 years) after these surgeries, disease risks tended to increase. We only found one study that had a similar follow-up time to our study (i.e. 20 years post-surgery) - Johansson et al 2003<sup>1</sup> investigated chronic disease 20 years after tonsillectomy and found disease prevalence was greater in the tonsillectomy group compared to the control group with a massive relative risk of 9.41 (95% CI 1.13-78.14). In a Taiwanese study<sup>2</sup> they found that tonsillectomy was significantly associated with all cancer types and breast cancer, but importantly, this was only apparent when follow-up was greater than 3 years. In a study by Mészáros et al 2010<sup>3</sup>, they found that tonsillectomy before age 7 was associated with a 1.5-fold increase in mortality.

*2) variable health effects of these surgeries.* It is perhaps often assumed that these surgeries always have positive short-term effects for the conditions they aim to treat, but this is not the case. The literature for improvement of otitis media after adenoidectomy is quite variable with some studies demonstrating an improvement after surgery<sup>4</sup>, others show limited short-term efficacy<sup>5</sup>, while others show no reduction in risk following surgery<sup>6</sup>.

*3) mechanistic link between adenoidectomy and subsequent otitis media.* There is a potential indirect mechanistic link that might explain the association between these surgeries otitis media, which would possibly take years to develop. A recent study by Chung et al 2016<sup>7</sup> found that tonsillectomy was significantly associated with the subsequent development of rhinosinusitis, which is an infection by bacteria or viruses of the sinuses. According to Corren & Rachelefsky 2007<sup>8</sup> rhinosinusitis is a predisposing factor for otitis media, where the infection may spread from sinuses to Eustachian tubes and middle ear where local inflammation and infection (otitis media) develops.



## References

1. Johansson E, Hultcrantz E. Tonsillectomy--clinical consequences twenty years after surgery? *Int J Pediatr Otorhinolaryngol*. Sep 2003;67(9):981-988.
2. Sun LM, Chen HJ, Li TC, Sung FC, Kao CH. A nationwide population-based cohort study on tonsillectomy and subsequent cancer incidence. *The Laryngoscope*. Jan 2015;125(1):134-139.
3. Meszaros D, Dharmage SC, Matheson MC, et al. Poor lung function and tonsillectomy in childhood are associated with mortality from age 18 to 44. *Respiratory medicine*. Jun 2010;104(6):808-815.
4. Maw AR. Chronic otitis media with effusion (glue ear) and adenotonsillectomy: prospective randomised controlled study. *British medical journal*. Nov 26 1983;287(6405):1586-1588.
5. Paradise JL, Bluestone CD, Colborn DK, et al. Adenoidectomy and adenotonsillectomy for recurrent acute otitis media: parallel randomized clinical trials in children not previously treated with tympanostomy tubes. *JAMA*. Sep 8 1999;282(10):945-953.
6. Morris PS, Leach AJ. Acute and chronic otitis media. *Pediatr Clin North Am*. Dec 2009;56(6):1383-1399.
7. Chung SD, Lin HC, Wu CS, Kao LT, Hung SH. A tonsillectomy increased the risk of chronic rhinosinusitis among children: A three-year follow-up study. *Int J Pediatr Otorhinolaryngol*. Dec 2016;91:82-85.
8. Corren J, Rachelefsky G. Sinusitis and Otitis Media. In: Lieberman P, Anderson JA, eds. *Allergic Diseases - Current Clinical Practice*: Humana Press; 2007.
